# Supplementary material for: Hidden in plain sight: commonly used copper N-heterocyclic carbene catalysts gain stabilization from anagostic Cu⋯H–C interactions
Source: Royal Society of Chemistry journal article supplement (doi:10.1039/d5sc09643j), 2026-01-01
Supplement: d5sc09643j1.xlsx [file d5sc09643j1.xlsx]

## Sheet: 2,6-iPr2
Query	Refcode	DIST1	DIST2	DIST9	DIST10	DIST3	DIST4	DIST5	DIST6	DIST7	DIST8	DIST11	DIST12	Min		Min
1	BABNUR	3.94	4.589	3.945	4.509	5.085	4.586	5.066	5.963	4.722	5.033	4.894	5.899	3.94
1	BAGDAS	3.916	4.426	3.845	4.403	5.303	4.235	5.939	3.949	3.712	5.336	3.929	5.917	3.712		Mean	3.7225
1	CADNOO	4.863	3.677	4.897	3.553	5.344	6.217	4.364	4.858	5.316	6.306	4.689	4.166	3.553		Standard Error	0.00651228
1	EJUXEP	4.162	4.223	4.022	4.164	5.684	4.035	4.084	5.747	3.821	5.54	5.669	3.67	3.67		Median	3.726
1	IJOHAT	4.473	3.989	4.587	3.956	5.86	3.943	5.155	4.649	6.092	4.247	4.317	5.344	3.943		Mode	3.249
1	IJOHEX	4.271	4.216	4.303	4.42	5.755	4.392	4.462	5.652	3.906	5.827	4.993	5.737	3.906		Standard Deviation	0.160578
1	IKUKIL	4.209	4.268	3.99	3.922	3.934	5.737	3.726	5.76	3.902	5.517	5.432	3.915	3.726		Sample Variance	0.0257852
1	IKULEI	4.001	4.448	3.848	4.273	3.596	5.506	4.575	5.901	3.695	5.341	5.772	4.193	3.596		Kurtosis	1.14409
1	OJOHIH	4.561	3.594	4.557	3.887	3.823	5.933	5.097	3.655	5.998	4.875	3.808	5.373	3.594		Skewness	-0.347666
1	OJOHIH01	4.547	4.53	3.909	3.608	4.818	5.991	3.841	5.929	3.83	5.394	5.11	3.685	3.608		Range	0.956
1	OJOHIH02	4.543	3.926	4.52	3.616	5.986	4.791	5.406	3.837	3.851	5.933	5.119	3.698	3.616		Minimum	3.249
1	OJOHIH03	4.537	3.933	4.51	3.624	4.776	5.983	5.418	3.85	3.87	5.928	5.12	3.721	3.624		Maximum	4.205
1	OJOHIH04	4.49	4.524	3.633	3.945	3.964	6.015	5.947	4.911	3.738	5.12	3.833	5.416	3.633		Sum	2263.28
1	OJOHIH05	4.485	3.64	4.521	3.951	3.919	5.947	5.124	3.756	5.939	4.904	3.854	5.429	3.64		Count	608
1	QACVAV	4.135	4.144	4.135	4.144	5.638	3.994	5.642	4.028	5.638	3.994	4.028	5.642	3.994
1	RADJAL	4.037	4.462	4.177	4.607	4.585	5.273	4.194	5.956	5.724	3.966	4.853	6.06	3.966
1	RADJAL	4.485	4.32	4.259	4.159	5.914	4.995	3.811	5.684	5.758	4.033	5.693	3.879	3.811
1	RADJAL	4.26	4.59	3.837	3.904	4.33	5.74	6.087	4.087	5.016	4.414	5.074	4.612	3.837
1	ULEWAM	4.131	4.383	4.198	4.433	5.527	4.652	5.164	5.592	3.865	5.714	4.834	5.835	3.865
1	ULEWAM	4.06	3.907	4.543	4.645	4.162	5.526	4.763	4.954	4.173	6.056	6.194	4.068	3.907
1	ULEWEQ	4.148	4.225	3.941	4.14	3.678	5.663	5.694	4.388	5.465	3.757	5.658	3.704	3.678
1	ULEWIU	4.272	4.286	4.248	4.178	5.609	4.818	5.671	4.73	4.829	5.553	5.51	4.749	4.178
1	ULEWUG	4.45	4.314	4.346	3.925	5.845	4.862	4.713	5.688	4.314	5.848	4.722	5.1	3.925
1	AFOCEE	3.972	3.898	4.415	4.268	3.708	5.486	3.87	5.407	5.933	3.923	5.768	3.637	3.637
1	AFUPEZ	3.819	4.501	3.848	4.321	5.251	3.86	5.781	5.09	4.923	4.56	3.985	5.822	3.819
1	AFUPID	3.78	4.334	4.082	4.541	4.963	4.443	5.851	4.279	4.5	5.454	6.068	4.45	3.78
1	AFUPID	4.389	3.997	4.457	3.892	5.895	4.192	4.717	5.135	4.387	5.963	4.499	5.199	3.892
1	AFUPOJ	4.15	4.299	4.07	4.123	5.602	4.131	5.664	4.634	4.871	5.177	3.811	5.699	3.811
1	AFUPUP	3.782	4.245	4.296	4.329	4.642	4.853	4.976	5.426	4.59	5.697	3.821	5.828	3.782
1	AFUPUP	4.12	4.18	3.995	4.428	5.069	5.124	5.705	3.832	4.068	5.481	5.869	4.701	3.832
1	AFUQAW	4.183	4.266	4.045	4.221	3.803	5.707	3.714	5.768	4.067	5.514	5.731	4.02	3.714
1	AGUVIK	4.381	3.855	4.278	4.289	4.523	5.838	5.286	4.099	4.15	5.801	5.807	3.859	3.855
1	AGUVIK	3.879	4.559	3.617	4.466	5.265	4.198	4.596	6.064	4.241	4.819	4.234	5.976	3.617
1	AGUVOQ	4.157	4.325	4.068	4.181	5.678	3.822	3.754	5.819	4.268	5.504	5.712	3.74	3.74
1	AGUVOQ	4.401	3.674	4.434	4.273	4.03	5.912	4.125	4.991	3.851	5.906	3.879	5.796	3.674
1	AGUYAF	4.044	4.073	4.118	4.328	4.601	5.576	4.469	5.426	3.84	5.65	5.849	3.936	3.84
1	AKONAQ	4.038	4.48	3.683	4.377	5.544	3.8	5.99	4.051	5.147	3.607	3.94	5.901	3.607
1	AKONEU	4.452	3.818	4.452	3.818	5.912	4.65	4.764	4.044	5.912	4.65	4.044	4.764	3.818
1	AKONIY	4.295	4.336	3.89	4.091	3.914	5.832	5.871	3.918	3.821	5.387	5.616	3.718	3.718
1	AKONUK	4.115	3.854	4.296	4.329	5.545	4.21	5.083	4.513	5.813	3.919	4.912	5.604	3.854
1	AMOHIV	3.919	4.336	4.115	4.29	5.326	4.244	5.854	4.027	5.463	4.45	3.826	5.804	3.826
1	AMOHIV	4.353	4.197	4.032	4.056	5.877	3.978	5.726	3.976	5.566	3.722	3.864	5.563	3.722
1	AMOHOB	4.171	3.91	3.938	4.507	5.672	3.818	5.364	4.236	5.332	4.561	4.016	6.032	3.818
1	AMOHOB	4.377	3.945	3.951	4.244	5.901	3.838	5.396	4.205	5.353	4.527	4.015	5.771	3.838
1	AMOHOB	4.397	4.03	3.939	4.255	5.922	4.072	5.398	4.245	5.383	4.152	3.829	5.813	3.829
1	AMOHUH	3.588	4.097	4.229	4.575	4.839	4.147	5.608	3.87	5.749	3.815	4.061	6.068	3.588
1	AMOHUH	4.168	4.532	3.693	4.142	5.694	3.863	6.05	4.079	5.197	3.582	4.428	5.528	3.582
1	AMOJAP	4.214	4.324	4.069	4.05	3.612	5.708	3.965	5.844	3.746	5.583	5.582	3.802	3.612
1	AMOJAP	4.313	3.914	4.346	4.012	3.842	5.831	3.656	5.427	3.802	5.84	5.522	3.712	3.656
1	AVIDEQ	4.486	4.069	4.486	4.069	6.012	4.313	3.891	5.587	6.012	4.313	5.587	3.891	3.891
1	AVIDIU	4.038	4.014	4.308	4.42	5.551	3.54	3.688	5.504	4.659	5.705	4.003	5.948	3.54
1	AVIDOA	4.314	3.923	4.432	4.115	5.839	4.062	3.705	5.443	4.183	5.958	5.628	3.933	3.705
1	AVIDUG	4.537	3.939	4.537	3.939	6.053	4.103	5.372	4.172	6.053	4.103	4.172	5.372	3.939
1	AVIFAO	4.321	4.608	3.676	4.051	5.839	3.855	6.122	4.325	3.833	5.142	3.631	5.565	3.631
1	AVIFES	4.409	4.251	4.204	4.138	5.872	4.589	4.029	5.766	3.742	5.704	4.083	5.617	3.742
1	AVIFIW	4.169	4.367	4.185	4.265	5.685	3.694	4.579	5.796	4.071	5.684	4.053	5.779	3.694
1	AVIFOC	4.261	4.244	4.157	4.103	5.796	3.994	5.759	4.014	5.673	3.994	3.569	5.605	3.569
1	BAJQAG	3.688	4.244	4.058	4.745	4.936	4.299	5.753	4.052	5.565	3.723	5.375	6.06	3.688
1	BAJQAG	4.018	4.307	4.053	4.478	5.446	4.346	5.828	4.083	5.579	3.764	5.176	5.747	3.764
1	BAJQAG	4.617	4.069	4.235	3.678	6.002	5.061	5.554	4.024	5.724	3.832	4.522	4.734	3.678
1	BAJQAG	4.624	3.941	4.419	3.783	6.072	4.897	5.423	3.803	5.941	3.947	4.454	4.982	3.783
1	BAJQEK	3.9	4.317	3.907	4.405	4.052	5.367	3.854	5.836	4.559	5.089	5.894	4.508	3.854
1	BAJQEK	4.144	4.295	3.777	4.37	4.273	5.582	3.969	5.826	3.683	5.272	5.886	4.001	3.683
1	BAJQIO	4.335	3.966	4.291	4.082	5.868	4.062	5.515	3.712	5.815	3.976	3.71	5.601	3.71
1	BAJQIO	4.579	4.186	4.138	3.816	5.983	4.991	5.701	4.07	5.659	4.109	3.649	5.332	3.649
1	BAJQOU	4.289	4.186	4.002	3.927	5.815	3.927	5.702	3.784	5.524	3.739	3.871	5.428	3.739
1	BAJQUA	4.095	4.223	4.166	4.134	3.716	5.616	3.847	5.743	4.255	5.634	5.656	3.753	3.716
1	BIBPIM	4.406	4.263	4.138	3.822	3.833	5.881	4.43	5.683	3.766	5.653	5.332	3.783	3.766
1	BIBPOS	3.768	4.302	4.122	4.356	4.034	5.179	4.002	5.815	4.091	5.576	5.843	4.466	3.768
1	BIBPOS	3.8	4.31	4.144	4.417	5.218	4.092	4.038	5.821	4.241	5.602	5.939	4.215	3.8
1	BIBPOS	4.228	4.406	3.781	4.441	4.001	5.758	4.296	5.934	4.308	5.023	5.974	4.04	3.781
1	BIBPOS	4.417	4.094	4.315	3.85	4.293	5.943	4.605	5.459	4.169	5.805	5.277	4.079	3.85
1	BIBPOS	3.794	4.339	3.873	4.491	4.152	5.083	4.406	5.797	4.167	5.22	5.974	4.29	3.794
1	BIBPOS	3.989	4.178	4.154	4.314	3.939	5.499	4.104	5.692	4.047	5.66	5.819	4.016	3.939
1	BIBPOS	4.328	3.909	4.507	4.158	4.37	5.859	4.053	5.372	4.137	6.04	5.65	4.17	3.909
1	BIBPOS	4.366	3.991	4.365	3.97	4.039	5.903	4.036	5.43	5.862	4.353	5.41	4.159	3.97
1	BIBPUY	4.073	4.239	3.985	4.316	3.824	5.591	5.681	4.33	4.012	5.429	5.83	3.791	3.791
1	BISZIO	4.215	4.244	4.06	4.038	3.778	5.742	3.87	5.783	5.587	3.763	3.773	5.557	3.763
1	BISZIO	4.377	3.543	4.801	3.813	4.929	5.729	3.795	4.876	6.314	4.441	5.316	3.796	3.543
1	BISZIO	4.431	3.934	4.159	4.009	5.932	4.046	3.956	5.419	3.899	5.688	5.52	3.671	3.671
1	BISZIO	3.575	3.729	4.383	4.883	3.602	5.036	3.691	5.222	4.19	5.839	6.291	5.238	3.575
1	BISZOU	3.966	4.061	4.234	4.445	5.49	3.753	3.802	5.59	3.735	5.737	4.326	5.966	3.735
1	BISZOU	3.86	3.845	4.607	4.265	3.785	5.379	3.882	5.313	4.825	6.053	4.419	5.744	3.785
1	BODKAJ	4.673	3.8	4.235	3.903	6.182	4.204	3.683	5.318	5.747	4.148	5.394	3.573	3.573
1	BODKEN	3.725	4.132	4.123	4.414	3.718	5.234	5.658	3.984	3.757	5.651	5.874	3.858	3.718
1	BODKIR	4.168	3.99	4.397	3.917	5.653	4.275	5.514	3.792	4.495	5.887	3.707	5.44	3.707
1	BODPES	4.159	3.989	4.474	4.387	5.653	4.239	4.666	5.229	5.955	3.908	5.761	4.886	3.908
1	BODPIW	3.724	4.306	4.017	4.625	3.844	5.183	4.275	5.82	3.626	5.541	4.046	6.071	3.626
1	BODPOC	3.828	4.241	4.285	4.542	5.003	4.556	4.471	5.692	5.609	4.822	5.917	5.013	3.828
1	BOLHIW	4.133	4.309	3.885	4.256	3.803	5.657	4.245	5.812	4.11	5.334	5.785	3.818	3.803
1	BOLHOC	4.118	4.122	4.118	4.122	5.648	3.935	3.977	5.634	5.648	3.935	5.634	3.977	3.935
1	BOLHUI	3.885	4.271	3.92	4.582	5.399	3.588	5.787	4.217	4.534	5.178	6.088	3.997	3.588
1	BOLJAQ	4.02	4.351	3.979	4.01	5.511	3.912	5.844	3.738	3.837	5.5	3.783	5.544	3.738
1	BOLJAQ	4.026	3.749	4.374	4.245	3.577	5.545	5.211	3.867	3.991	5.898	3.865	5.773	3.577
1	BUJWEL	4.19	3.931	4.184	4.331	5.692	3.653	5.409	4.011	5.703	4.291	4.287	5.84	3.653
1	BUJWEL	3.845	4.134	4.133	4.615	5.36	3.926	5.682	3.816	5.653	3.962	5.104	6.018	3.816
1	BUJWIP	3.953	4.251	4.028	4.553	3.926	5.369	3.684	5.757	3.914	5.535	6.082	4.456	3.684
1	BUJWIP	4.181	4.204	4.128	4.118	4.799	5.465	5.718	3.677	3.856	5.656	4.409	5.533	3.677
1	BUJWIP	4.059	4.353	3.838	4.345	4.26	5.478	3.887	5.856	4.222	5.207	5.861	3.92	3.838
1	BUJWIP	4.233	4.333	3.735	4.443	3.931	5.762	3.942	5.81	4.524	4.909	5.895	4.586	3.735
1	BUJWIP	3.881	3.799	4.427	4.505	5.365	3.837	4.799	4.63	5.865	4.494	4.12	5.934	3.799
1	BUJWIP	4.264	4.074	4.324	3.916	5.767	3.711	5.372	4.397	5.742	4.521	4.08	5.383	3.711
1	BUJWIP	4.129	4.209	4.032	4.228	5.633	3.646	5.73	3.917	5.552	3.585	5.609	4.598	3.585
1	BUJWIP	4.332	3.785	4.241	4.369	5.857	4.043	4.989	4.478	5.759	4.28	4.213	5.88	3.785
1	CEDHOJ	4.364	4.102	4.144	3.821	4.164	5.875	5.614	3.831	5.671	3.955	5.312	3.721	3.721
1	CEDHUP	3.8	4.225	4.103	4.588	4.382	4.904	3.816	5.754	3.578	5.616	6	4.923	3.578
1	CERKES	4.312	4.629	4.033	3.701	5.777	3.818	4.262	6.156	5.535	4.025	5.186	3.864	3.701
1	CEZDUH	3.867	4.51	3.953	4.244	3.85	5.338	6.006	3.894	3.73	5.431	4.091	5.755	3.73
1	CEZDUH	4.282	3.895	4.313	4.18	4.412	5.773	3.709	5.407	5.834	4.025	5.696	4.012	3.709
1	CIDGIG	4.026	4.01	4.149	4.211	5.525	3.968	3.838	5.535	5.659	4.073	3.972	5.74	3.838
1	CIRZUZ	4.295	4.093	4.484	4.293	5.691	3.534	4.974	4.209	5.017	5.888	5.787	4.515	3.534
1	CIRZUZ	4.265	3.991	4.409	4.347	3.511	5.771	4.883	4.987	4.555	5.87	4.455	5.765	3.511
1	CIRZUZ01	4.28	4.042	4.446	4.321	3.523	5.73	4.927	4.985	4.783	5.876	4.485	5.775	3.523
1	CODGUZ	4.175	3.953	4.335	4.044	3.652	5.682	5.379	4.147	3.983	5.856	5.546	3.981	3.652
1	CODGUZ	4.395	4.273	4.202	3.998	3.958	5.909	4.234	5.77	3.68	5.712	5.514	3.911	3.68
1	CODHAG	4.428	3.963	4.352	3.755	3.878	5.909	3.738	5.48	3.906	5.881	5.091	4.166	3.738
1	COXSIT	4.064	4.463	3.843	4.262	5.284	4.691	4.53	5.931	4.645	4.869	4.132	5.83	3.843
1	CUNVEO	3.591	4.255	3.683	4.663	5.072	3.522	5.702	3.59	3.546	5.198	4.353	6.188	3.522
1	CUNVEO	4.267	4.227	3.869	3.824	5.782	3.87	4.275	5.706	5.386	3.529	3.671	5.326	3.529
1	CUNVIS	3.766	4.148	3.914	4.887	3.543	5.274	5.661	3.923	3.569	5.434	4.457	6.399	3.543
1	CUNVIS	5.052	3.892	3.927	3.731	5.464	6.441	3.745	5.423	3.572	5.439	3.555	5.204	3.555
1	CUNVOY	4.264	3.949	4.366	3.918	3.699	5.761	3.921	5.47	5.866	3.77	3.874	5.427	3.699
1	CUNVOY	3.652	3.877	4.281	4.801	5.176	3.564	5.391	3.785	5.819	3.991	4.708	6.333	3.564
1	CUNVUE	3.935	4.588	3.713	4.398	3.656	5.454	6.099	4.21	5.235	3.635	5.906	3.834	3.635
1	CUNWAL	4.334	3.926	4.023	3.93	5.815	3.911	5.46	3.665	3.685	5.495	5.174	3.625	3.625
1	CUNWAL	3.627	4.292	4.069	4.255	3.661	5.146	5.812	4.173	3.7	5.561	5.736	3.731	3.627
1	DEGVOB	4.276	4.267	4.108	3.915	5.8	4.109	3.915	5.785	3.836	5.636	5.273	4.489	3.836
1	DEGVUH	4.205	4.401	4.111	3.889	3.782	5.724	4.001	5.919	4.276	5.566	5.403	3.764	3.764
1	DELFIM	3.578	4.355	3.918	4.743	4.967	3.77	4.583	5.819	3.799	5.453	4.496	6.277	3.578
1	DIMHAL	4.299	4.336	4.038	3.889	4.119	5.817	3.906	5.823	3.798	5.49	5.438	3.919	3.798
1	DOFVUR	4.32	3.867	4.432	3.847	5.749	4.629	5.132	4.299	3.995	5.959	3.808	5.323	3.808
1	DOFWAY	3.765	4.016	4.253	4.404	4.231	5.063	5.219	4.684	5.778	3.917	3.788	5.889	3.765
1	DOFWEC	4.171	4.117	3.949	4.467	4.247	5.626	5.631	4.283	3.539	5.268	5.918	3.642	3.539
1	DOFWEC	4.162	4.12	4.12	4.208	3.948	5.645	4.573	5.457	3.989	5.636	5.448	4.893	3.948
1	DOWQIS	4.245	3.847	4.422	4.067	5.768	3.987	4.524	5.066	3.843	5.893	4.036	5.563	3.843
1	DOWQIS	4.33	4.032	4.338	3.92	5.848	4.177	4.68	5.178	5.854	4.207	5.441	3.868	3.868
1	DOWRAL	4.091	3.951	4.371	4.282	5.617	3.984	4.305	5.358	5.823	4.304	4.007	5.806	3.951
1	DOWREP	3.949	3.656	4.846	4.513	3.649	5.46	4.721	4.493	5.329	6.203	4.814	5.939	3.649
1	DOWRIT	4.082	4.261	4.082	4.261	3.912	5.602	4.029	5.785	3.912	5.602	5.785	4.029	3.912
1	DOZVUM	4.062	4.384	4.07	4.085	5.57	3.876	5.895	3.919	3.651	5.594	3.987	5.603	3.651
1	DOZWIB	3.876	4.213	3.961	4.368	3.71	5.39	5.764	4.174	3.729	5.508	3.842	5.893	3.71
1	DOZWIB	4.321	4.107	4.087	3.999	3.876	5.838	5.637	3.841	4.17	5.471	3.648	5.506	3.648
1	DUMDOG	3.783	3.938	4.335	4.451	5.223	3.961	3.742	5.409	4.04	5.86	4.417	5.975	3.742
1	EDEKAB	4.345	4.324	4.357	3.802	3.832	5.846	5.833	3.869	5.85	3.989	4.373	5.077	3.802
1	EDEKEF	4.245	4.074	4.195	4.055	3.967	5.75	5.571	3.606	5.704	3.925	5.557	4.016	3.606
1	EGEJIM	3.935	4.455	3.93	4.238	3.705	5.453	5.959	3.982	5.427	3.868	5.735	4.142	3.705
1	EGEJIM	4.144	4.182	3.798	4.228	3.681	5.656	3.902	5.702	3.747	5.303	5.74	3.84	3.681
1	EHEBOK	4.05	4.059	4.499	4.287	4.624	5.314	5.573	3.967	5.083	5.817	5.748	4.563	3.967
1	EHEBOK	4.296	4.025	4.52	4.067	4.14	5.795	3.945	5.509	5.832	5.08	5.415	4.574	3.945
1	EHEBUQ	4.308	3.695	4.783	4.032	4.185	5.833	3.564	5.201	6.216	5.207	5.548	3.974	3.564
1	EHEBUQ	4.445	4.608	3.822	3.911	4.266	5.97	6.118	4.299	3.87	5.291	3.812	5.429	3.812
1	ENUWER	3.894	4.34	3.929	4.439	5.324	4.161	4.083	5.866	3.447	5.433	5.946	4.071	3.447
1	EVAHEO	4.099	4.217	4.099	4.217	5.661	3.813	5.748	3.867	5.661	3.813	3.867	5.748	3.813
1	EVAHEO01	4.146	4.182	4.146	4.182	5.682	3.845	3.899	5.701	5.682	3.845	5.701	3.899	3.845
1	EVICER	4.451	3.842	4.451	3.842	5.965	4.332	3.669	5.36	5.965	4.332	3.669	5.36	3.669
1	EVICIV	4.262	4.242	4.07	3.866	3.967	5.817	5.769	3.821	5.615	3.876	5.235	4.306	3.821
1	EVICIV	4.475	4.017	4.248	3.8	3.958	5.958	5.531	3.88	4.127	5.758	5.291	3.746	3.746
1	EVICOB	3.831	4.477	3.831	4.477	3.666	5.332	6.013	4.216	3.666	5.332	4.216	6.013	3.666
1	EWEJAT	3.99	4.323	3.728	4.535	5.474	3.968	5.799	3.764	5.236	3.671	6.004	4.605	3.671
1	FAFYAO	4.285	4.28	3.965	4.17	4.032	5.788	4.085	5.794	3.924	5.446	4.247	5.633	3.924
1	FAFYES	3.948	4.215	4.213	4.427	3.722	5.464	5.729	3.746	5.708	4.299	4.732	5.824	3.722
1	FAGBAS	3.654	4.386	3.845	4.583	4.385	4.729	5.904	4.259	5.356	3.775	4.128	6.095	3.654
1	FENDEJ	3.934	4.315	4.309	4.574	4.962	4.781	3.562	5.765	5.765	4.376	5.012	5.961	3.562
1	FENDIN	4.261	4.221	4.587	4.401	5.736	4.015	5.632	4.107	4.403	6.059	4.416	5.879	4.015
1	FENDIN	4.206	4.476	4.186	4.451	4.698	5.323	5.8	4.886	4.211	5.678	3.884	5.817	3.884
1	FIQVUZ	4.167	4.108	4.15	4.404	5.663	4.158	3.581	5.611	5.674	3.78	4.754	5.79	3.581
1	FOBHUC	4.669	3.995	4.319	3.643	6.175	4.171	5.542	3.663	4.239	5.836	3.983	5.014	3.643
1	FOBJAK	4.19	4.06	4.05	4.486	4.545	5.557	4.427	5.427	3.625	5.468	5.911	3.779	3.625
1	FOBJAK	4.304	3.979	4.163	4.184	5.894	3.856	4.363	5.326	5.423	4.82	5.407	4.871	3.856
1	FOBJEO	4.2	3.959	4.704	3.967	5.661	4.379	3.633	5.485	6.217	4.228	5.44	4.123	3.633
1	FOBJEO	3.967	4.255	3.966	4.74	3.614	5.475	5.735	4.396	3.76	5.492	6.147	5.052	3.614
1	FOBJIS	3.586	4.086	4.105	4.67	4.299	4.711	5.554	4.238	3.758	5.644	6.186	4.257	3.586
1	FORDAU	3.89	4.208	3.886	4.531	5.4	3.706	5.722	4.08	5.416	3.675	4.088	6.047	3.675
1	FORDEY	3.59	3.998	4.622	4.301	4.873	4.194	5.259	4.64	6.057	4.869	4.353	5.776	3.59
1	FORDEY	3.874	4.26	4.117	4.251	5.321	3.884	5.51	4.929	5.601	4.132	3.934	5.743	3.874
1	FORDIC	3.9	3.817	4.171	4.588	5.427	3.719	5.354	3.72	5.711	3.89	4.389	6.038	3.719
1	FORDIC	4.722	4.036	4.054	3.767	6.22	4.459	5.562	3.791	5.555	4.038	3.621	5.276	3.621
1	FORDOI	3.784	3.84	4.499	4.55	4.91	4.485	4.961	4.581	5.962	4.689	4.824	5.977	3.784
1	FORDUO	4.084	4.237	4.083	4.276	5.594	3.783	5.731	3.676	5.496	4.272	4.377	5.771	3.676
1	FORFAW	4.163	3.898	4.553	4.005	5.671	3.675	5.43	3.614	5.888	5.091	3.772	5.529	3.614
1	FORFEA	3.998	4.167	4.079	4.244	5.599	3.84	5.68	3.971	5.652	3.758	3.836	5.748	3.758
1	FORFEA	3.84	4.097	4.027	4.646	5.176	3.969	5.604	3.93	5.556	3.81	4.286	6.141	3.81
1	FORFIE	4.163	3.906	4.415	4.1	5.683	4.06	5.431	3.793	5.921	3.938	4.111	5.577	3.793
1	GADZET	4.186	3.666	4.402	4.21	5.696	3.582	3.814	5.146	5.937	4.055	5.738	3.958	3.582
1	GADZET	4.204	4.1	4.335	3.952	5.691	4.187	5.627	3.843	5.844	3.736	5.485	3.548	3.548
1	GERLIB	3.912	4.525	3.978	4.244	3.969	5.391	5.932	4.875	3.862	5.474	3.927	5.774	3.862
1	GEVDOD	4.256	4.147	4.317	4.153	5.761	4.085	5.505	4.554	3.868	5.821	4.373	5.577	3.868
1	GEVDUJ	3.978	4.441	3.943	4.336	5.5	3.643	3.899	5.913	5.441	3.985	5.822	4.338	3.643
1	GOQSUC	4.616	4.28	4.235	3.82	3.925	6.038	3.994	5.8	3.942	5.74	5.02	4.499	3.82
1	GOQTAJ	4.233	3.945	4.343	4.194	5.75	3.832	5.349	4.232	5.848	4.299	4.027	5.707	3.832
1	GOQTAJ	4.249	3.996	4.383	3.99	4.082	5.769	3.751	5.483	4.088	5.911	5.453	4.116	3.751
1	GOTGIH	4.338	4.081	4.029	3.853	5.83	3.79	5.624	3.913	5.567	3.795	5.355	3.855	3.79
1	GOTGIH	4.464	3.908	4.452	3.799	4.512	5.928	3.772	5.438	4.383	5.957	5.309	3.544	3.544
1	GOTGIH	3.745	3.824	4.381	4.538	3.587	5.276	3.789	5.309	5.899	4.079	6.057	4.115	3.587
1	GOTGIH	4.34	4.332	3.829	3.855	5.859	4.191	5.832	4.246	5.34	3.622	5.382	3.703	3.622
1	GUFJIC	3.752	3.971	4.455	4.359	3.984	5.186	5.492	3.736	5.972	4.315	4.187	5.883	3.736
1	GUFVAG	3.776	4.407	3.975	4.401	5.22	3.911	4.278	5.908	3.762	5.5	5.921	4.261	3.762
1	GUFVEK	4.084	3.854	4.525	4.139	5.583	3.906	5.026	4.633	6.018	4.6	3.928	5.66	3.854
1	GUFVIO	4.034	4.256	4.086	4.246	5.545	3.645	4.481	5.694	5.612	3.831	4.454	5.645	3.645
1	GUJNOR	3.731	3.88	4.271	4.294	4.802	4.535	5.278	4.119	5.809	3.965	4.065	5.83	3.731
1	GUJNOR	3.866	3.83	4.31	4.383	5.199	4.23	5.348	3.826	5.837	3.967	4.242	5.914	3.826
1	HEPTAY	4.248	4.177	4.161	4.055	5.767	4.174	5.726	3.9	3.918	5.688	5.477	4.292	3.9
1	HEPTAY	4.338	4.148	4.206	3.934	5.861	4.14	5.665	3.982	3.96	5.725	5.341	4.256	3.934
1	HEPTAY	4.413	4.021	4.442	3.844	4.199	5.922	5.542	3.966	4.158	5.953	5.107	4.496	3.844
1	HETWUB	3.923	4.554	3.77	4.374	4.486	5.212	6.048	4.022	4.376	5.028	5.871	4.419	3.77
1	HETWUB	4.282	4.085	4.228	4.054	4.649	5.672	3.798	5.616	4.681	5.601	4.901	5.125	3.798
1	HEWGIC	3.977	3.82	4.363	4.291	3.748	5.5	3.302	5.336	3.677	5.81	5.719	4.572	3.302
1	HEWPIL	4.025	4.333	4.124	4.378	5.533	3.904	5.726	4.572	5.547	4.4	5.885	4.083	3.904
1	HEWPOR	4.412	4.385	3.854	3.912	5.893	4.463	5.905	4.271	5.099	4.495	5.172	4.564	3.854
1	HOBPAR	3.985	4.36	4.042	4.15	5.504	3.917	5.854	3.742	5.567	3.85	3.799	5.672	3.742
1	HOBPAR	4.12	3.827	4.403	4.223	5.637	3.607	5.286	3.993	5.927	3.989	3.863	5.75	3.607
1	HOKSEI	4.024	4.341	4.001	4.233	4.061	5.494	3.993	5.888	3.769	5.61	5.799	3.979	3.769
1	HUTVIE	3.966	3.708	4.496	4.592	5.438	3.865	4.963	4.316	3.923	5.987	5.963	4.924	3.708
1	ICADEY	4.2	4.228	4.175	4.31	4.449	5.639	5.762	3.974	5.701	3.826	5.802	4.368	3.826
1	INUSOA	3.873	4.285	4.045	4.319	5.341	3.794	5.787	3.784	3.929	5.528	3.915	5.785	3.784
1	INUSOA	3.833	4.087	4.377	4.224	3.45	5.393	5.567	4.102	5.83	4.275	3.673	5.689	3.45
1	INUSUG	4.45	4.353	3.94	3.999	5.902	4.659	3.855	5.855	3.858	5.457	5.475	4.034	3.855
1	INUTAN	3.856	3.884	4.188	4.517	3.694	5.411	5.416	3.619	3.647	5.661	4.924	5.89	3.619
1	ITAYUZ	4.199	3.97	4.199	3.97	5.763	3.961	5.486	3.882	5.763	3.961	3.882	5.486	3.882
1	ITAZAG	4.005	4.11	4.29	4.205	3.76	5.53	5.619	3.908	3.911	5.793	3.979	5.707	3.76
1	ITAZIO	4.282	3.896	4.258	3.98	3.977	5.8	5.437	3.79	3.969	5.753	5.479	3.79	3.79
1	IYAWIP	3.997	4.199	4.087	4.372	3.74	5.522	4.011	5.728	5.532	4.114	5.938	4.165	3.74
1	IYAWOV	4.255	3.991	4.284	4.092	5.707	4.397	5.478	4.001	5.79	3.834	5.608	3.768	3.768
1	IYAWOV	4.498	3.906	4.26	3.766	6.012	4.43	3.757	5.416	5.765	3.835	4.243	5.073	3.757
1	JANYIJ	4.242	4.081	4.124	3.998	4.344	5.72	4.031	5.606	5.605	4.213	3.794	5.517	3.794
1	JEZSUF	3.755	3.842	4.342	4.745	5.251	3.665	3.8	5.352	5.859	4.029	4.235	6.236	3.665
1	JEZTAM	4.028	4.322	4.028	4.322	4.081	5.485	5.832	4.189	4.081	5.485	4.189	5.832	4.028
1	JEZWOD	3.806	4.198	3.897	4.647	5.251	3.99	3.807	5.725	5.421	3.614	6.036	4	3.614
1	JOVNOZ	4.066	4.086	4.1	4.416	3.804	5.603	5.582	4.049	4.819	5.334	4.031	5.959	3.804
1	JOVNOZ	4.354	4.253	4.269	3.899	4.768	5.782	3.927	5.769	5.78	3.794	5.401	3.94	3.794
1	KAMCOT	4.423	3.953	4.424	3.935	5.256	5.556	4.489	5.061	4.65	5.694	4.893	4.914	3.935
1	KAQSON	4.196	3.801	4.572	4.067	5.502	4.788	3.963	5.237	4.18	6.08	3.715	5.598	3.715
1	KAQSUT	4.06	3.95	4.369	4.211	5.581	3.96	4.72	5.111	4.04	5.906	4.539	5.651	3.95
1	KAVBAN	3.637	3.466	4.716	4.978	4.4	4.703	4.404	4.372	6.051	5.14	5.467	6.303	3.466
1	KAYSOV	4.233	4.078	4.516	3.776	3.804	5.747	4.884	5.145	3.963	6.027	5.286	3.745	3.745
1	KAYSUB	4.389	3.853	4.339	3.951	4.062	5.914	3.668	5.374	5.863	3.948	3.963	5.454	3.668
1	KECVAS	3.782	3.73	4.651	4.715	5.015	4.377	4.358	4.973	4.146	6.15	4.91	6.177	3.73
1	KECVAS	3.91	4.299	4.104	4.439	4.468	5.195	4.615	5.727	4.89	5.231	5.947	4.36	3.91
1	KECVAS	4.231	3.924	4.363	4.14	4.549	5.644	5.239	4.368	5.86	4.414	5.31	4.897	3.924
1	KEHHOX	4.402	4.108	4.401	3.99	3.891	5.909	5.578	4.116	5.913	4.066	5.242	4.495	3.891
1	KEKKUJ	3.974	3.66	4.748	4.372	5.187	4.591	4.734	4.473	6.258	4.748	4.464	5.842	3.66
1	KEKKUJ	4.176	3.933	4.462	4.238	4.613	5.531	4.711	5.072	5.805	4.967	4.899	5.516	3.933
1	KEKLAQ	3.984	3.676	4.756	4.381	5.199	4.621	4.75	4.499	6.267	4.83	4.481	5.843	3.676
1	KEKLAQ	4.169	3.941	4.501	4.264	4.623	5.531	4.718	5.049	5.858	4.953	4.9	5.54	3.941
1	KEMVOP	4.392	3.756	4.509	4.027	5.832	4.542	5.082	3.891	4.02	6.019	3.626	5.55	3.626
1	KIKKAS	4.13	3.932	4.355	4.225	3.946	5.653	5.424	3.806	5.892	4.075	5.732	4.058	3.806
1	KIQYAM	3.971	4.168	4.339	4.226	3.766	5.496	4.126	5.678	4.023	5.852	5.729	3.817	3.766
1	KIQYAM	4.178	4.252	4.306	4.091	4.131	5.678	3.861	5.768	4.201	5.816	5.609	3.648	3.648
1	KIQYEQ	4.226	4.624	3.919	3.882	4.289	5.684	4.702	6.108	3.597	5.424	5.324	4.043	3.597
1	KIQYIU	3.695	4.058	4.681	4.216	3.839	5.174	4.051	5.55	4.657	6.161	3.928	5.744	3.695
1	KIWNUB	4.057	4.183	4.057	4.183	4.263	5.524	3.715	5.687	4.263	5.524	5.687	3.715	3.715
1	KIWPAJ	4.046	3.822	4.31	4.475	4.176	5.519	3.717	5.358	4.002	5.811	5.983	4.379	3.717
1	KIWPEN	4.207	4.347	3.872	4.247	5.706	3.734	4.097	5.873	5.336	4.069	4.393	5.727	3.734
1	KIWPIR	4.2	4.087	4.246	3.99	5.633	4.676	5.607	3.811	4.313	5.747	3.794	5.49	3.794
1	KIWPOX	4.113	3.797	4.61	4.446	5.415	4.66	4.991	4.49	5.067	6.016	4.241	5.974	3.797
1	KIWPOX	4.456	3.824	4.65	3.981	5.901	4.578	4.922	4.639	6.04	5.075	4.617	5.233	3.824
1	KIWPUD	4.713	3.864	4.985	3.733	6.02	5.349	4.899	4.657	6.304	5.565	4.573	4.748	3.733
1	KUWLUK	3.828	3.952	4.143	4.658	3.73	5.321	4.464	5.3	5.661	3.899	4.319	6.179	3.73
1	KUWMAR	4.682	3.991	4.275	3.672	4.395	6.208	3.662	5.51	5.774	4.271	3.575	5.163	3.575
1	LAJMUG	4.138	4.347	3.859	4.262	4.019	5.577	4.031	5.963	3.652	5.387	5.727	4.178	3.652
1	LAJNAN	3.818	3.906	4.457	4.303	4.383	5.132	5.067	4.496	3.945	5.957	4.017	5.82	3.818
1	LUJVUI	4.195	4.26	3.947	4.198	3.809	5.72	4.221	5.774	4.05	5.394	5.685	4.264	3.809
1	LUJWAP	3.672	4.15	4.07	4.583	5.081	3.935	5.665	3.976	3.615	5.582	4.878	6.044	3.615
1	LUJWAP	4.205	3.889	4.641	3.985	4.006	5.723	3.685	5.329	6.057	4.965	5.451	4.114	3.685
1	LUJWET	3.936	3.778	4.604	4.393	3.779	5.452	5.286	3.387	4.024	6.089	5.783	4.813	3.387
1	LUJWET	4.344	4.578	3.857	4.031	4.044	5.867	3.927	6.056	5.362	3.581	5.518	4.048	3.581
1	LUKKUA	3.994	4.874	3.78	4.522	4.405	5.285	5.401	6.185	4.164	5.092	5.715	5.244	3.78
1	LUKLAH	4.736	4.56	3.81	3.703	4.767	6.239	6.081	4.14	4.296	5.119	4.874	4.443	3.703
1	LUKLAH	4.73	4.696	3.821	3.948	4.446	6.25	6.129	5.003	4.405	5.114	5.305	4.445	3.821
1	LUVZIO	4.421	4.55	3.663	3.953	5.927	4.267	6.083	4.353	4.846	4.439	3.714	5.463	3.663
1	LUVZOU	4.416	4.533	3.722	3.931	5.924	4.325	6.05	4.322	4.934	4.449	3.75	5.436	3.722
1	LUVZUA	4.114	3.705	4.558	4.048	3.773	5.639	3.722	5.156	4.258	6.08	5.578	3.78	3.705
1	LUWBAJ	4.117	4.522	3.7	4.061	5.65	3.81	6.037	4.262	5.095	3.8	3.801	5.601	3.7
1	LUWBEN	4.053	4.47	3.875	4.352	5.596	3.857	5.93	3.857	4.452	4.987	4.549	5.717	3.857
1	LUWBEN	3.982	4.718	3.997	4.388	4.823	5.125	4.822	6.226	4.848	5.016	5.801	4.797	3.982
1	MALYOP	3.925	4.625	3.839	4.37	5.476	3.774	4.306	6.161	3.748	5.316	4.422	5.821	3.748
1	MALYUV	3.901	4.408	3.901	4.408	3.866	5.402	4.103	5.904	3.866	5.402	5.904	4.103	3.866
1	MEQZAM	3.762	4.255	4.002	4.577	3.533	5.281	5.728	4.567	3.476	5.5	4.281	6.062	3.476
1	MOHXEO	3.836	4.065	4.007	4.513	3.688	5.326	5.592	3.764	3.645	5.534	6.03	4.333	3.645
1	MOHXOY	3.89	4.234	4.245	4.146	5.399	3.781	5.756	3.867	5.733	3.65	3.677	5.665	3.65
1	MOHXOY	4.356	4.182	4.32	3.767	5.766	4.77	3.76	5.712	3.735	5.825	3.606	5.305	3.606
1	MUSWAA	4.216	4.225	4.356	4.095	5.733	3.972	5.173	5.176	5.786	4.486	4.95	5.082	3.972
1	NAMWUW	3.947	4.518	3.796	4.258	3.847	5.448	4.222	6.045	3.845	5.261	5.777	4.056	3.796
1	NAMXAD	4.22	3.868	4.446	3.984	4.12	5.728	4.119	5.23	4.294	5.958	5.469	3.955	3.868
1	NAZPAI	4.515	3.565	4.683	3.895	6.043	4.276	4.275	4.739	6.208	4.47	3.529	5.419	3.529
1	NAZPAI	4.521	4.6	3.966	3.801	4.347	6.047	5.985	4.985	4.981	4.848	4.034	5.261	3.801
1	NETLOQ	4.377	4.492	3.894	3.878	5.879	3.849	5.95	4.673	5.383	3.806	3.942	5.337	3.806
1	NETLUW	3.849	4.474	4.017	4.621	5.041	4.575	5.893	4.814	5.245	4.686	5.126	5.993	3.849
1	NETMAD	4.308	4.42	4.13	3.882	5.598	4.898	5.667	5.054	5.424	4.619	4.348	5.191	3.882
1	NETMEH	3.766	4.327	4.138	4.655	4.832	4.496	5.772	4.442	5.325	4.826	5.125	6.004	3.766
1	NETMIL	3.761	4.448	3.761	4.448	5.207	3.79	5.9	4.543	5.207	3.79	4.543	5.9	3.761
1	NETMOR	4.478	3.772	4.478	3.772	5.935	4.614	5.242	3.799	5.935	4.614	3.799	5.242	3.772
1	NETMUX	3.983	4.025	4.391	4	5.303	4.456	5.505	3.672	5.885	3.844	3.722	5.502	3.672
1	NETMUX	4.409	4.257	3.926	3.965	5.929	4.211	5.755	3.722	5.445	3.603	3.885	5.451	3.603
1	NIHXAG	4.168	4.191	4.191	4.168	4.517	5.564	3.702	5.692	3.702	5.692	5.564	4.517	3.702
1	NIHYEL	4.349	4.194	4.216	4.066	5.72	4.809	5.429	4.879	5.706	4.243	4.109	5.574	4.066
1	NIHYEL	4.365	4.241	4.113	4.048	4.872	5.691	4.732	5.557	4.409	5.502	5.46	4.311	4.048
1	NIHZOV	4.157	4.077	4.263	4.129	3.769	5.68	3.826	5.583	3.738	5.778	5.6	4.168	3.738
1	NIJBIT	4.356	3.873	4.315	3.962	4.326	5.858	5.398	3.688	5.834	3.909	5.469	3.748	3.688
1	NIWROD	4.238	3.748	4.555	3.925	3.823	5.74	3.825	5.182	4.039	6.056	3.838	5.461	3.748
1	NIWSAQ	3.94	4.645	3.787	4.313	3.735	5.473	6.109	4.122	5.273	3.708	4.13	5.808	3.708
1	NOSNEQ	4.231	4.563	3.558	4.256	5.762	3.87	4.614	6.041	4.729	4.249	4.052	5.772	3.558
1	NOSNIU	4.251	4.431	3.913	4.128	3.949	5.775	5.953	4.117	5.066	4.683	4.078	5.637	3.913
1	NOSNOA	3.761	3.976	4.398	4.497	5.247	3.662	5.502	3.728	5.919	4.086	4.068	6.018	3.662
1	NOSNOA	3.78	4.534	3.671	4.541	4.967	4.402	5.991	4.812	5.195	3.482	4.936	5.899	3.482
1	NOSNOA	4.268	3.83	4.338	4.098	5.786	4.047	5.337	3.618	5.84	3.824	4.044	5.605	3.618
1	NOSNOA	4.441	4.04	4.141	3.869	5.917	4.47	5.57	3.7	5.673	3.976	4.1	5.269	3.7
1	NOSNUG	3.991	4.138	4.107	4.279	5.485	3.992	5.664	3.805	5.634	3.71	4.024	5.81	3.71
1	NOSNUG	4.25	4.014	4.283	4	5.757	4.145	5.53	3.803	5.807	3.892	3.778	5.522	3.778
1	NURYUX	3.698	4.552	3.829	4.716	5.062	3.935	6.064	4.104	5.397	3.586	4.815	6.185	3.586
1	NURYUX	4.316	4.555	3.769	4.307	5.88	3.875	6.032	4.622	5.242	3.847	4.284	5.801	3.769
1	NURYUX	4.398	4.483	3.831	4.096	5.889	4.312	5.99	4.404	5.345	3.676	3.761	5.612	3.676
1	NURYUX	4.682	3.781	4.623	3.74	6.151	4.822	5.295	3.629	6.066	4.064	4.086	5.004	3.629
1	NURZAE	4.086	4.108	4.224	4.339	3.497	5.554	5.634	3.672	4.618	5.617	4.005	5.861	3.497
1	NURZAE	4.099	3.888	4.386	4.333	5.61	3.759	3.746	5.404	4.229	5.911	4.17	5.87	3.746
1	NUSCAI	4.447	4.576	3.775	3.802	5.844	4.874	6.104	4.19	4.965	4.258	4.076	5.254	3.775
1	OSEJUS	4.44	4.481	3.989	4.042	4.566	5.923	5.1	5.777	4.5	5.321	5.515	4.138	3.989
1	OSEKAZ	4.29	3.776	4.533	4.194	4.05	5.812	4.567	4.885	4.35	6.049	5.306	5.013	3.776
1	OXUFAP	5.298	5.291	3.294	3.249	5.911	4.827	4.818	5.863	4.427	3.888	4.499	3.776	3.249
1	OXUFAP	5.298	5.291	3.294	3.249	5.911	4.827	4.818	6.627	4.427	3.888	4.499	3.776	3.249
1	OXUFAP	5.298	5.291	3.294	3.249	5.911	4.827	5.863	6.627	4.427	3.888	4.499	3.776	3.249
1	OXUFAP	5.298	5.291	3.294	3.249	5.911	6.608	4.818	5.863	4.427	3.888	4.499	3.776	3.249
1	OXUFAP	5.298	5.291	3.294	3.249	5.911	6.608	4.818	6.627	4.427	3.888	4.499	3.776	3.249
1	OXUFAP	5.298	5.291	3.294	3.249	5.911	6.608	5.863	6.627	4.427	3.888	4.499	3.776	3.249
1	OXUFAP	5.298	5.291	3.294	3.249	6.608	4.827	4.818	5.863	4.427	3.888	4.499	3.776	3.249
1	OXUFAP	5.298	5.291	3.294	3.249	6.608	4.827	4.818	6.627	4.427	3.888	4.499	3.776	3.249
1	OXUFAP	5.298	5.291	3.294	3.249	6.608	4.827	5.863	6.627	4.427	3.888	4.499	3.776	3.249
1	OXUFAP	3.27	3.298	5.193	5.323	3.74	4.513	4.628	3.823	5.875	4.778	6.576	4.857	3.27
1	OXUFAP	3.27	3.298	5.193	5.323	3.74	4.513	4.628	3.823	5.875	6.462	6.576	4.857	3.27
1	OXUFAP	3.27	3.298	5.193	5.323	3.74	4.513	4.628	3.823	6.462	4.778	6.576	4.857	3.27
1	OXUFAP	3.27	3.298	5.193	5.323	3.74	4.513	4.628	3.823	5.875	4.778	6.037	4.857	3.27
1	OXUFAP	3.27	3.298	5.193	5.323	3.74	4.513	4.628	3.823	5.875	6.462	6.037	4.857	3.27
1	OXUFAP	3.27	3.298	5.193	5.323	3.74	4.513	4.628	3.823	6.462	4.778	6.037	4.857	3.27
1	OXUFAP	3.27	3.298	5.193	5.323	3.74	4.513	4.628	3.823	5.875	4.778	6.037	6.576	3.27
1	OXUFAP	3.27	3.298	5.193	5.323	3.74	4.513	4.628	3.823	5.875	6.462	6.037	6.576	3.27
1	OXUFAP	3.27	3.298	5.193	5.323	3.74	4.513	4.628	3.823	6.462	4.778	6.037	6.576	3.27
1	PEMXIP	4.471	4.027	4.048	3.926	4.445	5.978	5.541	3.828	5.51	4.075	5.39	3.846	3.828
1	PEMXIP01	4.02	3.958	4.499	4.043	3.775	5.541	3.665	5.473	4.502	5.999	4.065	5.516	3.665
1	PEMXOV	4.205	4.254	4.016	3.995	4.216	5.733	4.043	5.794	3.908	5.486	5.499	3.815	3.815
1	PEPKOM	4.25	4.398	4.136	3.922	3.997	5.794	3.861	5.927	4.12	5.634	3.96	5.424	3.861
1	PEPKUS	4.188	3.849	4.448	4.271	5.718	3.838	3.881	5.349	4.046	5.96	5.763	4.257	3.838
1	PEPKUS	4.082	3.816	4.239	4.556	5.599	3.922	4.349	5.108	3.951	5.766	6.07	4.16	3.816
1	PIPKIL	4.598	4.48	3.785	3.888	4.154	6.109	5.996	4.038	5.298	3.683	4.425	5.194	3.683
1	PITCED	4.01	4.581	3.686	4.114	3.586	5.662	4.001	6.046	5.131	3.92	4.193	5.597	3.586
1	PITCED	4.043	4.366	4.035	4.179	4.581	5.355	3.986	5.883	3.784	5.546	3.675	5.641	3.675
1	PITCIH	4.215	4.245	4.049	4.102	4.27	5.663	4.525	5.685	5.513	4.21	3.837	5.622	3.837
1	PITCUT	3.895	3.991	4.478	4.128	5.13	4.552	5.501	3.636	5.978	3.974	3.726	5.638	3.636
1	PITCUT	4.19	4.268	4.109	4.027	3.661	5.706	5.626	4.619	5.623	3.83	5.488	4.229	3.661
1	PITDAA	4.254	4.272	4.098	4.04	3.673	5.741	5.615	4.759	5.63	3.815	5.508	4.144	3.673
1	PITDAA	4.508	4.103	3.889	3.915	3.96	6.003	3.675	5.625	5.128	4.525	3.646	5.433	3.646
1	PITDEE	4.046	4.249	4.154	4.21	5.568	3.603	5.631	4.408	5.687	3.845	5.683	4.345	3.603
1	PITDEE	4.081	4.11	4.393	4.047	5.384	4.663	3.576	5.625	5.905	3.955	3.723	5.55	3.576
1	PITDEE	4.131	4.014	4.037	4.36	3.706	5.647	4.138	5.601	5.355	4.619	5.871	3.94	3.706
1	PITDEE	4.567	4.182	4.06	3.896	4.009	6.059	3.919	5.71	4.23	5.506	5.343	4.128	3.896
1	POFXAL	4.311	4.157	4.087	3.981	5.81	3.704	5.681	3.773	5.613	3.819	3.816	5.481	3.704
1	POFXAL	4.181	4.391	3.898	4.23	3.695	5.691	4.349	5.892	3.79	5.41	5.672	4.394	3.695
1	POGCEV	4.381	3.971	4.381	3.971	4.243	5.889	4.543	5.24	4.243	5.889	5.24	4.543	3.971
1	POGYIV	4.101	4.417	3.825	4.215	4.676	5.391	4.108	5.949	4.474	5.09	5.36	5.038	3.825
1	POKNEK	3.512	4.71	4.185	5.05	3.887	4.849	5.17	6.084	4.876	5.433	6.391	5.583	3.512
1	POKNIO	4.048	3.895	4.842	4.398	5.566	3.837	5.148	4.486	4.28	6.318	5.911	3.908	3.837
1	POKNOU	4.008	3.899	4.849	4.434	3.827	5.519	5.171	4.465	4.308	6.33	3.927	5.943	3.827
1	POKNUA	3.486	4.884	3.671	4.864	4.739	4.048	6.413	4.435	5.057	4.071	6.18	5.506	3.486
1	POKPAI	4.137	3.713	4.561	4.081	5.668	3.871	4.983	4.297	4.021	6.042	5.574	3.806	3.713
1	POKPEM	4.421	4.214	4.03	3.838	4.879	5.784	3.788	5.697	5.541	3.631	5.284	3.934	3.631
1	PUBRAI	4.077	3.762	4.39	4.142	5.571	3.55	3.693	5.289	3.962	5.903	5.631	4.227	3.55
1	PUBRAI	4.186	4.325	3.85	4.185	5.683	3.651	4.006	5.834	3.679	5.377	4.155	5.704	3.651
1	PUBREM	4.285	4.157	4.23	3.758	4.287	5.799	3.578	5.67	4.135	5.746	5.265	3.759	3.578
1	PUQWEF	4.06	4.196	4.131	4.336	5.37	4.535	5.59	4.557	4.775	5.385	3.759	5.851	3.759
1	PUQWEF	4.361	3.823	4.352	4.093	4.567	5.809	5.319	3.747	5.711	4.825	4.693	5.328	3.747
1	PUQWEF	4.205	4.099	3.973	4.205	4.442	5.639	4.547	5.449	3.846	5.476	5.735	3.897	3.846
1	PUQWEF	3.781	4.511	4.081	4.298	5.295	3.718	4.372	6.04	4.46	5.467	4.716	5.685	3.718
1	PUQWIJ	3.595	4.102	4.228	4.638	5.037	3.665	4.551	5.457	5.743	3.681	4.739	6.123	3.595
1	PUQWIJ	4.182	4.025	4.353	4.175	5.598	4.508	3.797	5.519	5.881	3.919	4.519	5.584	3.797
1	PUTZEM	4.134	4.312	3.98	3.905	5.629	3.6	3.82	5.826	3.822	5.484	5.395	4.006	3.6
1	QAXKAC	4.374	4.004	4.374	4.004	4.82	5.737	4.521	5.275	4.82	5.737	5.275	4.521	4.004
1	QEGTII	3.818	4.166	4.409	4.467	4.576	4.988	5.606	4.421	5.175	5.627	5.911	3.834	3.818
1	QENLON	4.185	4.069	4.198	4.129	5.343	4.808	5.384	4.474	5.689	4.146	4.668	5.362	4.069
1	QENMOO	3.944	4.263	4.122	4.391	5.159	4.525	5.739	3.773	5.488	4.578	4.468	5.828	3.773
1	QENMOO	4.068	4.384	3.971	4.202	5.379	4.495	5.876	4.397	5.295	4.332	3.766	5.733	3.766
1	QENMOO	4.009	3.939	4.186	4.346	5.547	3.716	5.227	4.415	5.463	4.602	4.549	5.768	3.716
1	QENMOO	4.142	4.378	4.052	4.035	5.38	4.658	5.716	4.687	5.482	4.084	4.187	5.442	4.035
1	QENMUU	3.899	3.66	4.578	4.322	5.122	4.414	4.673	4.504	5.894	4.983	5.794	4.256	3.66
1	QICVUU	4.121	4.189	4.12	4.238	3.824	5.642	4.124	5.704	4.013	5.652	4.072	5.761	3.824
1	QICVUU	4.124	4.181	4.246	4.13	5.607	4.16	5.696	3.893	5.761	4.038	4.046	5.646	3.893
1	QICWAB	4.195	4.466	3.928	4.05	3.905	5.716	4.451	5.966	3.818	5.448	5.566	3.857	3.818
1	QICWEF	4.284	4.467	3.855	3.905	3.908	5.802	3.927	5.966	3.884	5.32	5.384	3.865	3.855
1	QICWIJ	3.94	4.385	3.917	4.245	5.41	3.92	5.912	3.984	5.391	3.933	4.021	5.767	3.917
1	QIFXOU	3.956	4.341	3.927	4.234	4.089	5.45	4.282	5.858	3.701	5.412	3.779	5.754	3.701
1	QIFXOU	4.344	3.913	4.146	4.007	4.116	5.858	5.411	3.925	3.79	5.669	3.771	5.556	3.771
1	QIFZIQ	3.934	4.432	3.934	4.432	3.609	5.465	3.972	5.935	3.609	5.465	5.935	3.972	3.609
1	QIFZOW	4.282	3.778	4.693	4.049	5.795	3.898	5.292	3.552	5.887	4.05	3.832	5.568	3.552
1	QIFZUC	4.122	4.122	4.122	4.122	5.631	4.007	5.631	4.007	5.631	4.007	4.007	5.631	4.007
1	QIGBAL	4.175	4.413	4.048	4.252	3.781	5.701	4.401	5.881	4.967	5.028	5.771	3.88	3.781
1	QIGBAL	4.216	4.372	4	4.174	4.979	5.328	5.883	4.196	5.142	4.829	5.37	4.873	4
1	QIGBEP	4.006	4.355	4.006	4.355	3.763	5.509	4.019	5.878	3.763	5.509	5.878	4.019	3.763
1	QIGBIT	4.09	4.016	4.48	4.052	5.611	3.672	5.192	4.806	5.998	4.289	4.778	5.303	3.672
1	QIGBIT	4.618	4.214	4.132	3.655	6.125	4.328	5.506	4.858	5.672	3.865	4.412	4.829	3.655
1	QIGBOZ	3.605	3.918	4.657	4.669	5.041	3.889	5.435	3.668	5.304	5.956	5.99	5.291	3.605
1	QIGBOZ	3.84	4.695	3.551	4.635	3.762	5.338	5.322	6.018	4.7	4.334	5.188	5.98	3.551
1	QIGBUF	4.316	3.943	4.324	4.176	4.505	5.783	4.751	5.108	3.786	5.811	5.702	4.063	3.786
1	QIGCAM	4.266	4.154	4.377	3.972	3.752	5.772	5.679	3.979	5.89	4.39	4.754	5.168	3.752
1	QOMDIH	4.769	3.997	4.207	3.584	4.298	6.273	5.519	3.657	5.731	3.971	4.742	4.322	3.584
1	QUBZIX	4.18	4.228	4.174	3.961	3.847	5.74	5.755	3.857	4.116	5.665	3.827	5.495	3.827
1	RAKDUE	4.234	4.168	3.931	4.357	5.75	4.13	5.673	3.967	5.454	3.774	4.008	5.893	3.774
1	RENYOB	3.887	4.246	4.373	4.446	5.09	4.579	5.704	4.431	5.847	4.205	4.673	5.865	3.887
1	RENYOB	3.942	4.049	4.518	4.344	5.184	4.638	4.376	5.45	6.018	4.482	4.682	5.792	3.942
1	RESGAZ	4.684	4.735	3.802	3.78	4.091	6.069	4.955	6.189	4.646	4.89	5.05	4.227	3.78
1	RESZEW	4.503	4.214	4.118	3.713	4.35	6.007	5.731	4.049	5.585	4.079	5.162	3.587	3.587
1	ROQPOE	4.436	4.105	4.383	4.022	3.82	5.892	4.983	5.181	3.823	5.881	5.099	4.932	3.82
1	RUMKAN	4.211	4.383	3.931	4.134	3.977	5.741	4.138	5.907	5.377	4.009	5.671	3.901	3.901
1	RUMKER	4.173	4.288	4.22	4.062	5.69	3.959	5.71	4.265	5.502	4.856	4.154	5.486	3.959
1	RUMKIV	4.169	4.192	4.198	4.204	5.729	3.776	5.718	4.255	5.678	3.767	4.155	5.699	3.767
1	RUMKOB	4.211	4.363	4.109	3.992	4.247	5.703	4.531	5.833	3.948	5.623	5.502	3.843	3.843
1	RUMKUH	3.766	4.406	3.897	4.561	4.99	4.373	5.813	4.75	5.186	4.37	4.151	6.09	3.766
1	RUMKUH	4.431	4.3	4.037	4.126	5.867	4.607	5.803	4.219	5.546	3.79	4.755	5.357	3.79
1	SEQRAI	4.446	4.251	4.004	3.761	4.185	5.955	3.961	5.786	3.825	5.509	5.193	3.825	3.761
1	SEQREM	4.021	4.06	4	4.273	4.065	5.523	3.99	5.572	3.987	5.502	5.793	3.823	3.823
1	SEQREM	4.176	4.285	3.997	3.948	3.952	5.714	4.325	5.792	3.695	5.511	5.492	3.558	3.558
1	SESNOV	3.95	4.537	3.97	4.474	5.455	3.924	6.047	4.403	5.432	4.105	4.66	5.945	3.924
1	SESNUB	3.978	3.936	4.474	4.438	3.724	5.514	5.457	3.552	5.676	5.136	5.501	5.369	3.552
1	SESPAJ	3.925	4.161	4.072	4.585	3.702	5.439	3.645	5.668	4.835	5.216	5.764	5.291	3.645
1	SETJEJ	3.856	4.375	3.856	4.375	3.665	5.372	4.078	5.898	3.665	5.372	5.898	4.078	3.665
1	SETKOS	4.074	3.764	4.637	3.996	5.601	3.767	5.136	3.938	6.15	4.392	3.669	5.517	3.669
1	SIJJIH	4.368	3.984	4.305	4.356	4.525	5.839	4.077	5.469	5.815	4.309	4.086	5.879	3.984
1	SILZOE	4.204	4.401	4.119	3.992	5.706	4.199	5.872	4.597	5.631	3.91	3.772	5.505	3.772
1	SINQAK	4.447	3.886	4.241	4.124	3.954	5.954	3.726	5.401	4.094	5.766	5.648	3.939	3.726
1	SOQZUV	3.781	4.335	4.023	4.49	3.689	5.289	3.884	5.862	3.936	5.525	4.085	6.006	3.689
1	SORNOE	4.403	4.195	4.181	3.924	5.658	5.1	5.714	3.694	5.693	3.891	5.398	3.981	3.694
1	SORNUK	4.211	3.83	4.543	4.128	4.406	5.67	5.342	3.608	5.975	4.87	3.808	5.653	3.608
1	SORPAS	3.979	4.288	3.967	4.487	5.508	3.819	3.931	5.803	4.606	5.22	4.585	5.969	3.819
1	SORPEW	4.136	4.464	3.969	4.424	3.791	5.657	5.965	4.286	3.924	5.45	4.314	5.937	3.791
1	SORPIA	3.72	4.197	4.243	4.658	5.071	4.122	3.734	5.716	3.799	5.776	4.549	6.148	3.72
1	SORPOG	4.148	4.295	4.151	4.37	5.665	3.761	5.602	4.695	3.85	5.67	4.508	5.843	3.761
1	SORPUM	3.986	4.241	3.986	4.241	5.491	3.908	5.764	3.847	5.491	3.908	3.847	5.764	3.847
1	SUGPES	4.601	3.875	4.379	3.698	6.087	4.677	3.673	5.39	3.98	5.892	5.193	3.604	3.604
1	TAJQIH	4.309	4.242	3.835	3.886	5.815	4.118	5.762	4.037	5.354	3.732	4.35	5.226	3.732
1	TATTIT	3.689	4.32	4.111	4.48	5.129	3.842	5.854	3.963	3.957	5.601	5.978	4.092	3.689
1	TAVRUF	4.556	3.734	4.556	3.734	6.001	4.675	3.748	5.194	6.001	4.675	5.194	3.748	3.734
1	TAXGUX	4.12	4.556	3.924	4.116	3.78	5.639	4.689	6.033	5.2	4.561	3.854	5.642	3.78
1	TOQRUO	4.061	3.853	4.541	4.088	3.747	5.583	3.745	5.363	4.531	6.052	5.631	3.73	3.73
1	TOQSAV	4.199	4.371	3.891	4.026	5.727	3.878	5.881	3.879	5.26	4.229	3.657	5.557	3.657
1	TOQSEZ	4.171	3.882	4.314	4.148	5.686	4.066	5.404	3.654	5.839	3.892	3.904	5.677	3.654
1	TOQSOJ	4.072	3.64	4.754	4.159	3.93	5.58	4.285	4.807	5	6.196	5.661	3.746	3.64
1	TOQSOJ	3.762	4.069	4.095	4.478	3.878	5.239	4.017	5.577	4.005	5.613	5.966	3.967	3.762
1	TOQSUP	4.372	4.222	3.966	4.021	4.602	5.833	3.998	5.728	3.626	5.498	5.546	4.038	3.626
1	TOVPIG	4.066	3.942	4.473	4.65	5.609	3.78	5.48	3.661	4	5.91	4.832	6.129	3.661
1	TOVPOM	4.206	4.465	3.89	4.182	5.718	4.048	4.186	5.965	4.558	5.099	5.452	4.785	3.89
1	UFAVUV	4.193	4.07	4.233	3.943	5.727	3.975	5.588	4.023	4.029	5.769	5.5	3.718	3.718
1	UFOROX	3.95	4.242	3.966	4.409	5.467	3.709	5.767	4.125	5.496	3.65	3.945	5.933	3.65
1	UFOROX	4.229	4.022	4.365	3.964	5.746	3.796	3.777	5.519	5.888	4.029	5.416	4.203	3.777
1	UFORUD	3.91	4.165	4.244	4.143	3.808	5.434	3.708	5.686	5.772	3.889	5.668	3.827	3.708
1	UFORUD	4.465	4.232	3.905	4.081	3.888	5.961	5.73	4.075	3.608	5.436	5.589	4.006	3.608
1	UJOVEV	3.586	4.231	4.103	4.552	4.849	4.132	5.774	3.824	5.612	3.894	4.122	6.042	3.586
1	UJOVEV	4.163	3.694	4.541	4.139	5.696	3.847	5.186	3.6	6.061	4.104	4.635	5.508	3.6
1	UJOVIZ	3.68	4.397	3.988	4.792	3.989	4.991	5.793	4.808	5.197	4.642	4.711	6.31	3.68
1	UJOVIZ	3.995	4.225	4.008	4.299	3.445	5.488	3.753	5.749	5.51	3.946	5.785	4.295	3.445
1	UJOVOF	4.132	4.007	4.307	4.241	5.647	3.909	3.958	5.511	4.089	5.817	3.913	5.774	3.909
1	UWIMUK	4.216	4.265	4.425	4.335	5.502	3.624	5.713	4.402	4.556	5.862	5.8	3.8	3.624
1	UYUSIS	3.707	4.498	3.707	4.498	4.819	4.401	5.996	4.401	4.819	4.401	4.401	5.996	3.707
1	VAFLOF	4.179	4.115	4.179	4.115	3.836	5.711	5.649	3.85	3.836	5.711	3.85	5.649	3.836
1	VAFLUL	4.136	4.149	4.136	4.149	5.655	3.896	5.669	3.885	5.655	3.896	3.885	5.669	3.885
1	VAFMAS	4.077	4.091	4.077	4.091	3.88	5.6	3.87	5.616	3.88	5.6	5.616	3.87	3.87
1	VEVSAS	4.224	4.108	4.224	4.108	3.941	5.727	5.633	3.971	3.941	5.727	3.971	5.633	3.941
1	VUCKIP	4.045	3.781	4.392	4.398	5.392	4.422	5.295	3.688	5.909	3.92	4.626	5.836	3.688
1	VUCKIP	4.353	3.937	4.108	4.14	5.837	4.355	5.437	3.459	5.619	3.91	3.67	5.651	3.459
1	VUPYOW	3.828	4.049	3.99	4.702	5.039	4.408	5.403	4.531	5.134	4.769	5.559	5.878	3.828
1	VUPYOW	4.238	4.254	4.087	3.823	4.582	5.623	4.827	5.466	4.452	5.402	4.984	4.515	3.823
1	VUPYUC	4.04	4.047	4.02	4.111	5.363	4.393	4.8	5.089	5.193	4.644	3.986	5.601	3.986
1	VUQBIU	4.19	4.113	4.19	4.113	3.816	5.718	5.646	3.865	3.816	5.718	3.865	5.646	3.816
1	WAPKAC	3.938	3.961	4.343	4.181	5.463	3.791	5.489	3.733	4.103	5.872	5.678	3.974	3.733
1	WAPKAC	3.999	4.121	4.175	4.131	3.816	5.52	5.644	3.853	3.95	5.694	5.665	3.946	3.816
1	WAPKEG	4.339	4.016	4.206	4.054	5.861	4.012	5.541	3.726	5.744	4.021	5.581	3.841	3.726
1	WAPKEG	4.437	4.377	3.891	3.955	5.968	4.249	5.898	4.08	3.742	5.416	5.485	3.647	3.647
1	WAXMOA	3.91	3.874	4.696	4.641	4.634	5.051	5.056	4.583	6.223	4.662	4.301	6.197	3.874
1	WICCET	4.15	4.071	4.184	3.835	3.768	5.664	5.541	4.061	5.694	3.772	5.349	3.784	3.768
1	WISJEQ	4.262	4.157	4.143	4.18	4.034	5.779	3.827	5.68	3.818	5.659	5.689	3.906	3.818
1	WOCWUI	4.137	3.88	4.283	4.087	4.049	5.659	5.098	4.505	4.156	5.807	4.867	5.154	3.88
1	WOCYET	3.928	4.554	3.834	4.368	5.461	3.61	4.329	6.054	4.035	5.217	4.418	5.862	3.61
1	WOCYIX	4.015	4.095	4.204	4.306	5.52	3.834	5.388	4.679	4.17	5.699	5.726	4.644	3.834
1	WUDXAX	3.992	4.416	3.945	4.003	4.481	5.284	5.762	4.786	5.446	3.763	5.216	4.594	3.763
1	WUDXEB	4.322	4.373	4.164	3.989	4.754	5.657	5.707	4.746	5.317	4.912	4.885	5.048	3.989
1	WUDYAY	3.934	4.29	3.744	4.329	3.964	5.389	5.581	4.759	4.336	4.952	4.695	5.695	3.744
1	WUTBOF	4.591	3.991	4.51	3.681	4.275	6.114	3.681	5.5	4.74	5.919	4.771	4.457	3.681
1	WUTBOF	4.595	3.58	4.643	3.903	4.605	6.08	4.157	4.662	4.182	6.146	5.406	3.619	3.58
1	WUTBUL	4.187	3.96	4.506	4.198	4.023	5.697	4.86	4.994	4.016	6.02	5.191	5.192	3.96
1	WUTCAS	4.73	4.72	3.92	3.948	5.048	6.168	5.069	6.138	4.743	5.058	5.069	4.787	3.92
1	WUTCAS	4.153	4.339	4.268	4.375	4.873	5.329	4.96	5.607	4.892	5.556	5.675	4.915	4.153
1	WUTCAS	4.149	4.134	4.483	4.517	4.872	5.359	4.799	5.341	4.984	5.808	5.833	5.057	4.134
1	WUTCEW	4.353	4.072	4.302	3.887	5.464	5.174	5.594	3.723	4.568	5.674	5.107	4.438	3.723
1	WUTCIA	4.526	4.233	4.179	3.633	6.04	4.037	5.723	3.936	5.684	3.626	3.795	5.069	3.626
1	WUWPUB	4.992	4.001	4.191	3.556	5.571	6.308	5.495	3.924	4.249	5.696	3.956	4.822	3.556
1	WUWQAI	4.032	4.389	3.887	4.14	5.543	3.69	5.882	3.89	4.666	5.136	5.664	3.725	3.69
1	WUWQAI	4.002	4.046	4.201	4.229	5.49	3.87	3.664	5.56	5.672	3.615	4.092	5.766	3.615
1	WUWQEM	3.834	4.624	3.678	4.447	3.724	5.338	4.051	6.071	3.319	5.185	5.799	4.952	3.319
1	WUWQEM	3.951	4.452	3.835	4.429	3.957	5.427	3.827	5.918	5.317	3.518	5.935	4.055	3.518
1	XATTAQ	4.629	4.476	4.053	3.731	5.956	5.194	5.989	4.409	5.135	4.867	4.307	5	3.731
1	XAXQET	4.058	4.623	3.825	4.105	5.568	3.702	6.125	4.244	5.052	4.358	3.76	5.63	3.702
1	XAXQIX	4.252	4.169	4.104	4.049	3.959	5.748	5.722	4.044	4.215	5.637	5.586	3.862	3.862
1	XAXQOD	4.064	4.621	3.932	3.932	3.88	5.571	4.499	6.123	4.568	5.158	5.415	3.902	3.88
1	XEJZOE	4.55	3.92	4.414	3.816	6.049	4.508	5.188	4.511	5.807	4.845	4.758	4.728	3.816
1	XEJZOE	4.538	3.875	4.494	3.907	6.063	4.208	5.082	4.471	5.926	4.762	4.609	5.083	3.875
1	XEJZUK	4.373	4.279	4.119	4.261	4.995	5.65	5.752	4.47	5.499	4.515	4.322	5.73	4.119
1	XENNIO	4.028	4.347	3.965	4.324	4.019	5.516	4.391	5.836	4.052	5.439	5.841	3.863	3.863
1	XESVEY	4.656	4.508	3.881	3.975	6.106	4.861	6.009	4.067	5.011	4.653	4.958	4.91	3.881
1	XIJXUK	4.206	4.172	3.916	4.126	3.914	5.7	5.688	3.894	3.75	5.42	5.63	3.554	3.554
1	XIKZIC	4.093	4.164	4.088	4.116	5.281	4.708	5.67	4.027	4.443	5.415	5.176	4.889	4.027
1	XIQGEK	3.776	4.727	3.757	4.623	4.195	5.103	6.167	5.038	4.228	5.073	6.156	4.255	3.757
1	XIWFAN	3.714	4.684	3.625	4.666	5.117	4.013	6.199	4.26	4.876	4.137	6.18	4.287	3.625
1	XODQOZ	3.804	4.382	4.367	4.152	3.627	5.337	3.857	5.89	4.139	5.877	5.634	4.264	3.627
1	XODQOZ	4.216	4.56	3.678	4.023	5.732	3.969	6.061	4.09	5.179	3.561	3.797	5.546	3.561
1	XODQUF	3.697	4.216	4.007	4.58	5.192	3.627	5.731	4.027	5.54	3.8	4.068	6.074	3.627
1	XODQUF	3.792	4.301	4.478	4.184	5.326	3.572	5.814	4.057	5.99	3.982	4.235	5.678	3.572
1	XODQUF	4.005	3.692	4.594	4.223	3.811	5.538	3.514	5.195	4.086	6.093	5.747	3.973	3.514
1	XODQUF	4.419	3.729	4.263	4.368	3.851	5.921	3.586	5.258	4.444	5.742	5.889	4.145	3.586
1	XODRAM	3.864	4.324	4.409	4.064	3.686	5.397	3.799	5.835	4.178	5.922	5.542	4.153	3.686
1	XODRAM	4.231	4.544	3.674	4.037	5.748	3.96	6.053	4.1	5.184	3.561	3.794	5.563	3.561
1	XODREQ	4.108	4.398	4.318	3.85	5.586	4.219	5.913	4.169	5.833	3.817	3.684	5.383	3.684
1	XODREQ	4.23	4.542	3.669	4.06	3.943	5.746	4.086	6.051	3.575	5.169	5.581	3.826	3.575
1	XODRIU	4.251	3.844	4.269	4.26	3.994	5.773	3.351	5.354	4.277	5.792	5.779	4.039	3.351
1	XODRIU	4.111	4.339	3.877	4.6	3.808	5.627	3.87	5.802	3.987	5.384	6.106	4.001	3.808
1	XODROA	3.818	4.375	4.374	4.129	3.633	5.352	3.843	5.882	4.144	5.881	5.607	4.241	3.633
1	XODROA	4.217	4.555	3.679	4.022	5.737	3.966	6.056	4.097	5.184	3.551	3.791	5.551	3.551
1	XODRUG	3.768	4.446	4.336	4.226	3.595	5.296	3.93	5.956	4.097	5.851	5.712	4.331	3.595
1	XODRUG	4.227	4.59	3.696	4.007	5.737	4.004	6.079	4.08	5.195	3.577	3.813	5.542	3.577
1	XODSAN	3.802	4.403	4.353	4.165	3.613	5.331	3.871	5.907	4.124	5.866	5.646	4.277	3.613
1	XODSAN	4.22	4.565	3.683	4.012	5.741	3.994	4.09	6.062	3.549	5.19	3.788	5.539	3.549
1	XODSER	3.624	4.124	4.214	4.53	3.801	5.065	3.705	5.643	3.936	5.738	6.031	4.055	3.624
1	XODSIV	4.277	3.787	4.573	3.818	3.746	5.778	3.726	5.301	6.09	4.255	3.656	5.328	3.656
1	XODSOB	3.865	4.321	4.406	4.055	3.69	5.399	3.8	5.831	4.174	5.921	5.533	4.136	3.69
1	XODSOB	4.228	4.542	3.671	4.033	5.739	3.967	6.046	4.108	5.181	3.56	3.791	5.559	3.56
1	XODSUH	4.028	4.295	4.422	3.884	4.109	5.51	3.778	5.806	4.189	5.94	5.42	3.711	3.711
1	XODSUH	4.039	4.531	3.667	4.239	3.795	5.565	4.105	6.039	3.556	5.177	5.756	3.974	3.556
1	XODTAO	3.885	3.835	4.247	4.401	3.61	5.404	3.64	5.362	3.83	5.764	5.901	3.813	3.61
1	XODTES	3.796	4.238	4.062	4.326	3.62	5.315	5.762	3.89	3.821	5.584	5.837	3.846	3.62
1	XODTES	4.317	3.812	4.243	4.019	3.866	5.834	3.682	5.317	3.661	5.742	5.534	3.821	3.661
1	XODTIW	4.375	3.839	4.301	3.786	3.936	5.883	3.765	5.368	4.156	5.836	5.315	3.513	3.513
1	XODTUI	3.733	4.583	3.835	4.413	3.498	5.274	4.518	6.103	3.789	5.326	5.916	4.236	3.498
1	XODTUI	3.895	4.589	4.022	4.191	4.094	5.397	3.906	6.052	3.727	5.524	5.724	4.147	3.727
1	XODTUI	4.102	4.799	3.766	4.016	3.698	5.579	4.272	6.306	3.88	5.199	5.549	3.825	3.698
1	XODTUI	4.516	3.757	4.501	3.676	4.805	5.977	3.558	5.268	3.975	5.997	5.182	3.658	3.558
1	XODVAQ	3.74	4.005	4.461	4.249	3.528	5.276	3.919	5.459	3.917	5.993	5.75	4.227	3.528
1	XODVAQ	3.763	4.154	4.293	4.261	3.695	5.294	3.732	5.686	3.761	5.819	5.759	3.813	3.695
1	XODVEU	4.953	3.938	4.272	3.321	5.09	6.423	3.833	5.457	4.411	5.767	4.7	3.518	3.321
1	XODVEU	4.018	4.337	4.193	4.026	3.683	5.532	4.106	5.84	3.728	5.708	5.507	4.198	3.683
1	XODVIY	3.681	4.354	4.028	4.495	4.466	4.806	3.913	5.879	3.861	5.533	5.893	4.923	3.681
1	XODVIY	3.932	4.053	4.353	4.55	5.371	4.234	5.54	4.064	5.851	3.739	4.91	5.97	3.739
1	XODVOE	4.327	3.785	4.443	4.154	5.836	3.792	4.931	4.516	5.861	4.766	5.66	4.091	3.785
1	XODVUK	4.368	3.956	4.862	3.718	5.82	3.737	3.642	5.459	5.015	6.339	3.426	5.245	3.426
1	XODVUK	4.412	4.171	4.22	3.909	5.898	3.774	5.693	3.768	5.749	3.9	3.68	5.408	3.68
1	XOHFOQ	3.858	4.371	3.858	4.371	3.676	5.364	4.206	5.881	3.676	5.364	5.881	4.206	3.676
1	XUPVUA	4	4.856	3.759	3.93	3.874	5.523	6.364	4.716	4.712	4.664	3.726	5.461	3.726
1	YIZBUG	4.248	3.606	4.332	4.119	4.132	5.756	5.096	3.668	3.837	5.823	3.744	5.635	3.606
1	YIZBUG	3.961	3.86	4.472	3.998	3.88	5.484	3.579	5.368	5.986	4.116	5.525	3.806	3.579
1	YOQMID	3.853	4.658	3.642	4.475	3.483	5.371	4.408	6.181	3.74	5.103	5.997	4.282	3.483
1	YOQMID	3.863	3.68	4.529	4.679	5.348	3.738	3.848	5.158	4.427	6.046	5.118	6.057	3.68
1	YOQSAB	4.38	4.069	4.632	4.274	5.867	4.525	5.387	4.597	6.032	3.956	5.694	4.687	3.956
1	YOQTUW	3.708	4.582	3.987	4.541	3.922	5.17	5.968	4.95	5.047	4.81	6.06	4.41	3.708
1	YOQTUW	4.665	4.506	3.897	3.629	4.419	6.186	6.029	4.283	3.523	5.421	4.231	4.888	3.523
1	YOQWAF	4.147	4.079	4.147	4.079	3.86	5.672	5.61	3.785	3.86	5.672	3.785	5.61	3.785
1	YOQWOT	4.219	3.808	4.594	4.333	5.66	4.421	3.514	5.314	6.017	4.018	4.671	5.757	3.514
1	YOQWOT	4.351	3.852	4.585	4.17	3.892	5.872	5.354	3.795	4.023	6.009	5.609	4.349	3.795
1	YOQWUZ	4.236	4.448	3.735	4.072	5.734	3.67	5.953	3.922	3.719	5.18	5.579	3.974	3.67
1	YOQXAG	3.556	4.41	4.337	4.425	4.184	4.828	5.745	4.991	4.971	5.624	5.783	4.942	3.556
1	YOQXEK	4.309	3.93	4.473	4.179	3.942	5.84	3.869	5.444	3.977	5.964	3.847	5.708	3.847
1	YOZXAP	4.22	4.386	4.115	4.102	5.734	4.146	4.099	5.921	3.878	5.634	5.611	3.862	3.862
1	YOZXAP	4.61	4.029	4.269	3.824	6.123	4.224	5.551	3.747	4.038	5.81	3.577	5.328	3.577
1	YUCYON	4.314	4.126	4.333	3.898	3.914	5.838	4.042	5.633	5.828	4.352	5.327	4.077	3.898
1	YUDZEF	3.685	4.571	3.685	4.571	3.729	5.156	6.084	4.135	3.729	5.156	4.135	6.084	3.685
1	YUFBAF	3.792	4.614	3.75	4.415	3.744	5.265	4.31	6.121	5.274	3.67	4.712	5.815	3.67
1	YUFBEJ	3.943	4.337	4.451	4.076	5.461	3.865	4.117	5.854	5.981	4.003	5.599	3.75	3.75
1	YUFBIN	4.084	4.216	4.084	4.216	5.52	4.303	3.615	5.7	5.52	4.303	5.7	3.615	3.615
1	YUGHIU	4.13	3.93	4.191	4.506	4.97	5.264	5.45	3.65	4.016	5.706	6.027	4.215	3.65
1	APUBUL	4.402	4.273	4.051	4.026	4.955	5.881	5.793	3.989	5.584	3.771	5.525	4.029	3.771
1	ENEFEL	4.128	3.866	4.351	4.211	5.651	3.95	4.553	5.053	5.884	3.924	5.623	4.501	3.866
1	ENEFEL	3.911	3.944	4.303	4.285	4.241	5.287	4.26	5.334	5.782	4.425	4.605	5.686	3.911
1	IMOMUV	4.5	3.965	4.335	4.058	3.869	5.98	5.305	4.462	4.325	5.836	3.987	5.548	3.869
1	IMUXUM	3.78	4.039	4.279	4.326	5.213	3.823	5.564	3.863	5.783	3.973	4.177	5.827	3.78
1	IMUXUM	3.85	4.409	4.019	4.513	5.352	3.927	5.886	3.921	5.43	4.105	4.333	6.04	3.85
1	IMUXUM	4.122	4.085	4.122	4.085	5.628	4.07	5.606	3.788	5.628	4.07	3.788	5.606	3.788
1	IMUXUM	4.298	3.975	4.298	3.975	5.777	3.822	5.463	3.94	5.777	3.822	3.94	5.463	3.822
1	IMUXUM	4.349	3.929	4.408	3.979	5.895	4.172	5.281	4.279	5.858	3.986	4.021	5.457	3.929
1	IMUYAT	3.955	3.41	4.906	4.22	5.483	3.773	4.805	3.688	6.409	4.514	4.058	5.758	3.41
1	IRUQIY	4.667	4.598	3.865	3.96	4.267	6.193	5.159	5.913	5.244	4.245	3.957	5.433	3.865
1	OROXOL	3.76	3.697	4.403	4.749	4.924	4.432	5.196	3.591	5.887	4.034	4.605	6.257	3.591
1	OROXUR	4.202	4.509	4.141	4.044	4.248	5.632	4.025	6.014	3.733	5.673	5.573	3.797	3.733
1	ATANUH	4.605	4.428	3.972	3.854	4.505	6.119	4.395	5.945	3.913	5.487	5.374	3.629	3.629
1	ITOGOQ	3.959	4.304	4.109	4.296	5.462	3.907	5.841	4.02	4.337	5.537	4.216	5.77	3.907
1	ITOGOQ	4.346	4.117	4.073	3.959	5.856	3.76	3.783	5.661	3.998	5.588	5.399	3.987	3.76
1	IYOCIL	3.73	4.503	3.911	4.627	4.539	4.809	5.015	5.82	5.069	4.694	5.273	5.837	3.73
1	IYOCIL	4.676	3.752	4.561	3.869	5.334	5.91	4.613	4.831	5.942	4.929	5.007	4.62	3.752
1	IYOCIL	3.786	4.576	3.79	4.777	4.569	4.921	4.922	5.958	4.84	4.678	5.372	6.05	3.786
1	IYOCIL	4.657	4.534	3.93	3.754	5.854	5.345	5.107	5.82	5.041	4.793	4.592	4.854	3.754
1	IYOCOR	4.326	4.154	4.362	4.278	4.431	5.795	5.247	4.935	5.837	4.413	4.856	5.534	4.154
1	IYOCOR	4.253	4.46	4.297	4.205	5.391	4.839	4.65	5.835	5.495	4.864	5.309	4.984	4.205
1	IYOLAM	3.975	4.449	3.94	4.265	4.609	5.179	4.703	5.859	5.449	3.743	5.438	4.924	3.743
1	IYOLAM	4.142	4.277	4.099	4.048	5.335	4.838	5.808	3.914	4.411	5.463	5.241	4.689	3.914
1	IYOLEQ	4.067	4.244	4.056	4.177	5.373	4.502	4.84	5.441	4.58	5.298	4.098	5.671	4.056
1	IYOLOA	4.085	4.079	4.46	4.053	4.685	5.308	4.525	5.319	5.938	4.312	5.422	4.406	4.053
1	IYOLUG	4.351	4.03	4.431	3.825	5.579	5.031	4.553	5.293	4.683	5.807	4.985	4.587	3.825
1	IYOMAN	4.442	4.398	3.859	3.738	4.3	5.951	4.271	5.894	4.995	4.535	4.469	4.818	3.738
1	IYOMER	4.155	4.519	4.206	4.236	4.895	5.325	4.72	5.976	4.874	5.392	4.814	5.501	4.155
1	IYOMER	4.261	4.067	4.531	4.26	5.385	5.048	5.354	4.55	5.194	5.762	4.585	5.604	4.067
1	IYOMIV	3.796	4.454	3.947	4.409	4.344	5.054	5.832	4.778	5.269	4.344	5.788	4.811	3.796
1	IYOMIV	3.944	4.27	4.155	4.519	5.277	4.343	4.634	5.671	4.074	5.693	5.048	5.824	3.944
1	OVAQAG	4.187	3.988	4.164	4.321	3.557	5.671	5.495	3.925	4.183	5.666	3.687	5.812	3.557
1	OVAQAG	4.244	4.021	4.089	4.284	3.713	5.752	5.537	3.896	4.2	5.57	3.673	5.787	3.673
1	OXAWAO	4.281	4.397	4.192	4.22	4.212	5.791	5.704	4.957	4.684	5.488	5.426	4.963	4.192
1	OXAWAO	4.581	4.282	4.224	3.831	4.969	5.966	4.556	5.782	5.441	4.945	4.503	4.999	3.831

## Sheet: Cy_Ad
Query	Refcode	DIST13	DIST14	DIST15	DIST16	DIST17	DIST18	Min		Min
1	CISBUC	4.947	3.444	3.222	3.444	3.222	4.947	3.222
1	CISBUC	4.947	3.444	3.222	3.444	3.649	4.947	3.222		Mean	3.23146
1	CISBUC	4.947	3.444	3.222	3.444	3.649	3.222	3.222		Standard Error	0.01247
1	CISBUC	4.947	3.444	3.649	3.444	3.649	4.947	3.444		Median	3.2225
1	CISBUC	4.947	3.444	3.649	3.444	3.649	3.222	3.222		Mode	3.015
1	CISBUC	3.222	3.444	3.649	3.444	3.649	3.222	3.222		Standard Deviation	0.128386
1	CISCAJ	3.281	3.428	4.944	3.45	4.874	3.957	3.281		Sample Variance	0.0164831
1	CISCAJ	4.925	3.433	3.322	3.461	4.849	3.015	3.015		Kurtosis	2.20143
1	CISCAJ	3.281	3.428	4.944	3.45	3.041	3.957	3.041		Skewness	0.726957
1	CISCAJ	4.925	3.433	3.322	3.461	4.067	3.015	3.015		Range	0.697
1	CISCAJ	3.281	3.428	4.944	3.45	3.041	4.874	3.041		Minimum	3.015
1	CISCAJ	4.925	3.433	3.322	3.461	4.067	4.849	3.322		Maximum	3.712
1	CISCAJ	3.281	3.428	3.561	3.45	4.874	3.957	3.281		Sum	342.535
1	CISCAJ	4.925	3.433	3.505	3.461	4.849	3.015	3.015		Count	106
1	CISCAJ	3.281	3.428	3.561	3.45	3.041	3.957	3.041
1	CISCAJ	4.925	3.433	3.505	3.461	4.067	3.015	3.015
1	CISCAJ	3.281	3.428	3.561	3.45	3.041	4.874	3.041
1	CISCAJ	4.925	3.433	3.505	3.461	4.067	4.849	3.433
1	CISCAJ	3.322	3.433	3.505	3.461	4.849	3.015	3.015
1	CISCAJ	4.944	3.428	3.561	3.45	4.874	3.957	3.428
1	CISCAJ	3.322	3.433	3.505	3.461	4.067	3.015	3.015
1	CISCAJ	4.944	3.428	3.561	3.45	3.041	3.957	3.041
1	CISCAJ	3.322	3.433	3.505	3.461	4.067	4.849	3.322
1	CISCAJ	4.944	3.428	3.561	3.45	3.041	4.874	3.041
1	CISCAJ	3.485	3.429	3.332	3.434	3.162	3.654	3.162
1	CISCAJ	4.918	3.43	3.256	3.432	4.929	3.223	3.223
1	CISCAJ	3.485	3.429	3.332	3.434	4.926	3.654	3.332
1	CISCAJ	4.918	3.43	3.256	3.432	3.598	3.223	3.223
1	CISCAJ	3.485	3.429	3.332	3.434	4.926	3.162	3.162
1	CISCAJ	4.918	3.43	3.256	3.432	3.598	4.929	3.256
1	CISCAJ	3.485	3.429	4.924	3.434	3.162	3.654	3.162
1	CISCAJ	4.918	3.43	3.565	3.432	4.929	3.223	3.223
1	CISCAJ	3.485	3.429	4.924	3.434	4.926	3.654	3.429
1	CISCAJ	4.918	3.43	3.565	3.432	3.598	3.223	3.223
1	CISCAJ	3.485	3.429	4.924	3.434	4.926	3.162	3.162
1	CISCAJ	4.918	3.43	3.565	3.432	3.598	4.929	3.43
1	CISCAJ	3.256	3.43	3.565	3.432	4.929	3.223	3.223
1	CISCAJ	3.332	3.429	4.924	3.434	3.162	3.654	3.162
1	CISCAJ	3.256	3.43	3.565	3.432	3.598	3.223	3.223
1	CISCAJ	3.332	3.429	4.924	3.434	4.926	3.654	3.332
1	CISCAJ	3.256	3.43	3.565	3.432	3.598	4.929	3.256
1	CISCAJ	3.332	3.429	4.924	3.434	4.926	3.162	3.162
1	PAPDEQ	4.324	3.343	4.394	3.439	4.606	4.23	3.343
1	PAPDEQ	4.391	3.263	4.065	3.61	4.834	4.426	3.263
1	QIFZUC	4.385	3.35	4.385	3.35	4.385	4.385	3.35
1	RESGIH	4.555	3.36	4.199	3.317	3.973	4.649	3.317
1	TUKGUC	4.167	3.254	4.294	3.289	4.541	4.014	3.254
1	TUKGUC	4.482	3.279	4.097	3.252	4.226	4.398	3.252
1	TUKGUC	4.187	3.347	4.461	3.18	3.791	4.517	3.18
1	TUKGUC	4.517	3.307	4.238	3.208	4.527	3.8	3.208
1	VAFMEW	3.442	3.346	4.858	3.314	4.84	3.232	3.232
1	VAFMEW	3.515	3.356	3.176	3.387	4.902	3.305	3.176
1	VAFMEW	3.442	3.346	4.858	3.314	3.327	3.232	3.232
1	VAFMEW	3.515	3.356	3.176	3.387	3.442	3.305	3.176
1	VAFMEW	3.442	3.346	4.858	3.314	3.327	4.84	3.314
1	VAFMEW	3.515	3.356	3.176	3.387	3.442	4.902	3.176
1	VAFMEW	3.442	3.346	3.192	3.314	4.84	3.232	3.192
1	VAFMEW	3.515	3.356	4.867	3.387	4.902	3.305	3.305
1	VAFMEW	3.442	3.346	3.192	3.314	3.327	3.232	3.192
1	VAFMEW	3.515	3.356	4.867	3.387	3.442	3.305	3.305
1	VAFMEW	3.442	3.346	3.192	3.314	3.327	4.84	3.192
1	VAFMEW	3.515	3.356	4.867	3.387	3.442	4.902	3.356
1	VAFMEW	3.176	3.356	4.867	3.387	4.902	3.305	3.176
1	VAFMEW	4.858	3.346	3.192	3.314	4.84	3.232	3.192
1	VAFMEW	3.176	3.356	4.867	3.387	3.442	3.305	3.176
1	VAFMEW	4.858	3.346	3.192	3.314	3.327	3.232	3.192
1	VAFMEW	3.176	3.356	4.867	3.387	3.442	4.902	3.176
1	VAFMEW	4.858	3.346	3.192	3.314	3.327	4.84	3.192
1	VAFMIA	3.429	3.387	4.903	3.355	4.868	3.429	3.355
1	VAFMIA	3.429	3.387	4.903	3.355	3.283	3.429	3.283
1	VAFMIA	3.429	3.387	4.903	3.355	4.868	3.283	3.283
1	VAFMIA	3.429	3.387	3.35	3.355	4.868	3.429	3.35
1	VAFMIA	3.429	3.387	3.35	3.355	3.283	3.429	3.283
1	VAFMIA	3.429	3.387	3.35	3.355	4.868	3.283	3.283
1	VAFMIA	3.35	3.387	4.903	3.355	4.868	3.429	3.35
1	VAFMIA	3.35	3.387	4.903	3.355	3.283	3.429	3.283
1	VAFMIA	3.35	3.387	4.903	3.355	4.868	3.283	3.283
1	VAFMOG	4.897	3.445	3.063	3.412	3.121	4.897	3.063
1	VAFMOG	4.897	3.445	3.063	3.412	3.682	4.897	3.063
1	VAFMOG	4.897	3.445	3.063	3.412	3.682	3.121	3.063
1	VAFMOG	4.897	3.445	3.861	3.412	3.121	4.897	3.121
1	VAFMOG	4.897	3.445	3.861	3.412	3.682	4.897	3.412
1	VAFMOG	4.897	3.445	3.861	3.412	3.682	3.121	3.121
1	VAFMOG	3.063	3.445	3.861	3.412	3.121	4.897	3.063
1	VAFMOG	3.063	3.445	3.861	3.412	3.682	4.897	3.063
1	VAFMOG	3.063	3.445	3.861	3.412	3.682	3.121	3.063
1	VAFNEX	4.219	3.447	4.777	3.378	4.564	4.173	3.378
1	VAFNEX	4.088	3.249	4.464	3.239	4.587	4.256	3.239
1	VAFNIB	4.366	3.308	4.292	3.383	4.704	3.957	3.308
1	VAFNIB	4.806	3.38	3.717	3.348	4.499	4.206	3.348
1	VAFNIB	4.404	3.55	4.693	3.459	3.816	4.887	3.459
1	VAFNIB	4.043	3.293	4.533	3.403	3.981	4.756	3.293
1	XATTUK	4.186	3.277	4.398	3.468	4.311	4.617	3.277
1	YUHREB	4.413	3.306	4.256	3.177	3.865	4.454	3.177
1	YUHREB	4.366	3.197	4.074	3.366	4.237	4.543	3.197
1	YUHRIF	3.334	3.305	3.221	3.364	3.351	4.88	3.221
1	YUHRIF	3.334	3.305	3.221	3.364	3.356	4.88	3.221
1	YUHRIF	3.334	3.305	3.221	3.364	3.356	3.351	3.221
1	YUHRIF	4.832	3.305	3.221	3.364	3.351	4.88	3.221
1	YUHRIF	4.832	3.305	3.221	3.364	3.356	4.88	3.221
1	YUHRIF	4.832	3.305	3.221	3.364	3.356	3.351	3.221
1	YUHRIF	4.832	3.305	3.334	3.364	3.351	4.88	3.305
1	YUHRIF	4.832	3.305	3.334	3.364	3.356	4.88	3.305
1	YUHRIF	4.832	3.305	3.334	3.364	3.356	3.351	3.305
1	ZAKFEZ	4.146	3.717	3.784	3.712	3.814	4.079	3.712
1	ZAKFID	4.131	3.7	3.772	3.704	3.795	4.088	3.7

## Sheet: tBu
Query	Refcode	DIST3	DIST4	DIST5	DIST6	DIST7	DIST8	Min		Min
1	ZUZKOX	4.836	3.58	3.127	3.32	3.254	4.815	3.127
1	AMOGIU	3.301	4.846	3.323	3.411	3.32	4.889	3.301		Mean	3.13487
1	AMOGIU	3.343	3.408	4.893	3.173	3.491	4.839	3.173		Standard Error	0.0279656
1	AMOGIU01	3.57	4.888	3.22	3.213	3.455	4.853	3.213		Median	3.195
1	AMOGOA	3.257	4.852	3.385	4.871	3.579	3.159	3.159		Mode	3.297
1	AMOJOD	3.323	4.854	3.258	3.285	4.924	3.509	3.258		Standard Deviation	0.155706
1	AMOJOD	4.887	3.221	3.495	4.86	3.165	3.498	3.165		Sample Variance	0.0242444
1	AMOJUJ	4.854	3.231	3.382	3.568	3.225	4.929	3.225		Kurtosis	-1.17211
1	AMOKAQ	4.923	3.405	3.33	3.455	3.202	4.863	3.202		Skewness	-0.593004
1	BITPUS	4.889	3.418	3.235	3.329	3.447	4.949	3.235		Range	0.475
1	BITPUS	4.91	3.428	3.276	4.911	3.317	3.369	3.276		Minimum	2.832
1	BITYOV	4.213	4.706	2.868	4.949	3.432	3.4	2.868		Maximum	3.307
1	BITYUB	3.446	4.928	3.298	3.298	4.928	3.446	3.298		Sum	97.181
1	CISCEN	4.831	3.848	3.006	3.006	3.848	4.831	3.006		Count	31
1	GAQZOQ	4.651	4.597	2.93	3.723	3.139	4.946	2.93
1	GAQZOQ	4.728	4.22	2.832	2.942	4.623	4.661	2.832
1	GAQZOQ	4.761	4.369	2.922	3.496	3.291	4.955	2.922
1	GAQZOQ	4.792	4.254	2.928	2.919	4.772	4.331	2.919
1	GAQZOQ	2.936	3.945	4.83	4.672	2.959	4.581	2.936
1	GAQZOQ	4.903	4.01	3.063	3.978	3.018	4.901	3.018
1	HEPSOL	4.888	3.369	3.4	3.453	3.307	4.894	3.307
1	QIGBAL	4.854	3.364	3.243	4.924	4.047	3.09	3.09
1	QIGBAL	4.923	3.195	3.661	3.346	3.282	4.841	3.195
1	RIPWAR	3.297	4.844	3.328	3.328	4.844	3.297	3.297
1	SAYYOJ	3.215	3.393	4.828	4.846	3.36	3.291	3.215
1	SAZCUU	4.881	3.394	3.297	4.896	3.303	3.416	3.297
1	WOZREK	4.892	3.268	3.385	4.905	3.356	3.36	3.268
1	WOZSAH	3.334	3.339	4.899	4.914	3.27	3.4	3.27
1	XATTOE	2.963	4.783	4.267	4.869	3.519	3.172	2.963
1	XATTOE	4.691	4.359	2.91	4.828	3.006	3.943	2.91
1	YUDZUV	3.306	3.451	4.903	4.903	3.451	3.306	3.306

## Sheet: 2,6-Me2
Query	Refcode	DIST1	DIST2	DIST3	DIST4	Min		Min
1	NUYVIQ	4.09	4.272	4.094	4.003	4.003
1	NUYVOW	4.185	4.128	4.143	3.911	3.911		Mean	3.78509
1	NUZCOE	3.84	4.353	4.041	4.175	3.84		Standard Error
1	RUZKEG	3.986	4.309	4.091	4.321	3.986		Median	3.773
1	AGUXIM	3.943	4.438	3.976	4.377	3.943		Mode	3.766
1	AGUXIM	3.623	4.566	3.506	4.904	3.506		Standard Deviation	0.18672
1	AGUXOS	4.389	3.979	4.472	3.931	3.931		Sample Variance	0.0348645
1	AGUXOS	3.622	4.58	3.449	4.943	3.449		Kurtosis	-0.226751
1	AKOROK	4.345	3.844	4.463	3.988	3.844		Skewness	-0.0174784
1	AMOJET	3.83	4.676	3.83	4.676	3.83		Range	0.906
1	AMOJIX	3.819	3.78	4.486	4.643	3.78		Minimum	3.253
1	BABNOL	4.126	4.392	3.878	4.217	3.878		Maximum	4.159
1	BAGDIA	4.295	4.03	4.371	3.797	3.797		Sum	560.193
1	BOLHES	4.37	3.893	4.37	3.893	3.893		Count	148
1	BOLJEU	3.72	4.35	3.824	4.693	3.72
1	CADNII	3.677	4.28	4.082	4.701	3.677
1	CILJAJ	4.633	3.73	4.528	3.703	3.703
1	CILJEN	3.73	4.484	3.837	4.54	3.73
1	CIMBOS	3.892	4.558	3.578	4.354	3.578
1	CIMBOS	3.98	4.681	3.425	4.301	3.425
1	CISBAI	4.256	4.483	3.641	3.873	3.641
1	CISBAI	3.953	3.909	4.126	4.318	3.909
1	CISBEM	3.766	4.106	4.089	4.529	3.766
1	CISBEM	4.375	4.096	4.13	3.904	3.904
1	CISBIQ	3.756	4.365	3.756	4.365	3.756
1	CISBOW	4.297	3.827	4.297	3.827	3.827
1	DOZWOH	3.927	3.99	4.495	4.015	3.927
1	EVUGUA	4.087	3.848	4.299	4.168	3.848
1	EVUGUA	4.325	4.248	3.899	3.709	3.709
1	EVUGUA	3.787	4.187	3.915	4.212	3.787
1	EVUGUA	4.069	3.708	4.367	4.173	3.708
1	EWEGUK	4.697	4.693	3.585	3.527	3.527
1	EWEHIZ	4.21	4.135	4.21	4.135	4.135
1	EWOQEO	4.338	4.243	4.062	4.099	4.062
1	EWOQIS	4.109	3.714	4.474	4.341	3.714
1	FIJFIQ	4.458	3.866	4.291	3.609	3.609
1	FOCTUQ	4.198	3.751	3.979	4.173	3.751
1	FOCVAY	3.808	3.919	4.599	4.474	3.808
1	FOCVAY	4.478	3.466	4.885	3.735	3.466
1	FOCVAY	4.264	4.011	4.39	3.956	3.956
1	FUTKUB	3.895	4.057	4.193	4.236	3.895
1	GEFBUS	4.252	4.087	4.252	4.087	4.087
1	GOQSUC	4.202	4.001	4.381	4.184	4.001
1	GUKBIB	3.545	3.59	4.687	4.63	3.545
1	HEPSUR	3.529	3.584	4.644	4.739	3.529
1	HEPSUR	3.6	4.703	3.549	4.651	3.549
1	HOBNOD	4.739	4.319	3.942	3.769	3.769
1	HOBNUJ	4.309	4.467	3.738	4.126	3.738
1	HOBPEV	4.435	3.663	4.729	3.683	3.663
1	HOBPEV	4.563	3.809	4.357	3.857	3.809
1	HOBPEV01	4.403	3.887	4.229	4.021	3.887
1	JUVMOF	4.097	4.127	4.097	4.127	4.097
1	JUVMOF	4.116	4.136	4.116	4.136	4.116
1	KAQVOQ	4.194	4.303	4.145	4.373	4.145
1	KAQVOQ	4.28	4.094	4.36	4.288	4.094
1	KEHQAQ	4.344	4.489	4.133	4.241	4.133
1	KIQYOA	4.117	4.292	4.133	4.276	4.117
1	KUFGUO	4.513	3.881	4.208	4.082	3.881
1	KUMJOU	3.927	4.652	3.8	4.399	3.8
1	KUMJUA	4.111	3.923	4.742	4.418	3.923
1	KUMJUA	3.964	4.772	3.766	4.565	3.766
1	MAGYOK	4.092	4.503	3.864	3.924	3.864
1	MOXSEA	3.822	3.665	4.589	4.149	3.665
1	MOXSEA	4.299	4.262	3.922	3.998	3.922
1	NIHZIP	4.439	4.621	3.928	3.856	3.856
1	NIHZIP	3.955	3.924	4.249	4.467	3.924
1	NIHZUB	4.366	3.755	3.967	4.279	3.755
1	NIJBAL	4.727	4.014	4.132	3.737	3.737
1	NIXLIQ	4.155	4.134	4.155	4.134	4.134
1	NONVIW	4.298	4.642	3.944	4.009	3.944
1	OJOFID	4.301	4.052	4.301	4.052	4.052
1	ORUMIZ	4.731	4.654	3.54	3.52	3.52
1	ORUMOF	4.657	4.936	3.479	3.527	3.479
1	PAPDOA	4.113	4.541	3.621	4.186	3.621
1	PEMXUB	3.989	4.593	3.694	4.39	3.694
1	QEGDOX	3.598	4.488	3.873	4.574	3.598
1	QICWOP	4.605	4.441	3.955	3.701	3.701
1	QIFZIQ	3.94	4.489	3.94	4.489	3.94
1	QIFZOW	4.704	3.712	4.378	3.704	3.704
1	QIRNAK	4.169	4.255	3.689	3.952	3.689
1	QIRNAK	4.401	3.605	4.203	4.002	3.605
1	QIRNAK	4.013	3.493	4.399	4.16	3.493
1	QIRNAK	4.213	4.238	3.632	4.052	3.632
1	QIRNIS	3.981	3.595	4.545	4.229	3.595
1	QOMDED	3.69	3.906	4.327	4.513	3.69
1	QOMDON	4.257	4.031	4.29	4.115	4.031
1	QOMDON	3.767	4.206	3.962	4.86	3.767
1	QOMDUT	3.83	4.022	4.091	4.387	3.83
1	REBLUH	4.293	4.188	4.052	3.976	3.976
1	RENYER	3.824	3.775	4.422	4.61	3.775
1	RENYER	4.477	4.325	3.908	3.949	3.908
1	RESFEC	4.172	4.127	4.164	4.418	4.127
1	REVHIK	4.515	3.769	4.328	3.67	3.67
1	RIYQID	3.925	5.041	3.253	4.216	3.253
1	RIYSOL	4.08	3.425	4.841	4.116	3.425
1	RONWIE	3.903	4.024	4.198	4.285	3.903
1	RUJWEB	4.281	4.684	3.771	3.906	3.771
1	RUMJEQ	4.278	4.201	4.077	3.901	3.901
1	RUMJEQ	3.784	4.268	4.008	4.334	3.784
1	RUMJIU	3.996	3.699	4.855	4.046	3.699
1	RUMJOA	4.159	4.159	4.159	4.159	4.159
1	RUMJUG	4.048	4.758	3.745	4.017	3.745
1	RUMWON	3.968	4.073	4.071	4.202	3.968
1	RUMWON	4.16	4.521	3.598	4.07	3.598
1	RUMWON01	3.909	4.265	3.893	4.372	3.893
1	RUMWUT	4.129	3.91	4.256	4.124	3.91
1	RUMWUT	4.394	4.005	4.273	3.71	3.71
1	RUMXAA	4.477	3.898	4.572	3.811	3.811
1	RUMXAA	3.599	4.529	3.955	4.687	3.599
1	SARFAU	3.885	3.578	4.562	4.395	3.578
1	SARFAU	3.981	3.797	4.301	4.414	3.797
1	SEQRIQ	4.344	3.92	4.466	3.866	3.866
1	SILZUK	3.908	3.995	3.981	4.674	3.908
1	TAQQEK	4.245	4.717	3.957	3.726	3.726
1	TAQQEK	4.405	4.523	3.656	4.066	3.656
1	TATTEP	3.902	3.931	4.376	4.291	3.902
1	TATTEP	3.816	4.021	4.137	4.392	3.816
1	TOCKOO	4.676	4.494	3.711	3.792	3.711
1	TOCKOO	4.649	4.82	3.599	3.622	3.599
1	TOCLAB	4.616	3.839	4.129	3.827	3.827
1	TOCLAB	3.959	4.33	4.164	3.953	3.953
1	UBECOX	4.059	4.615	3.667	4.349	3.667
1	UBECOX	4.663	4.446	3.799	3.541	3.541
1	UTOCIQ	3.988	4.324	3.701	4.423	3.701
1	VAFNAT	4.753	4.104	4.045	3.528	3.528
1	VUGFEL	3.884	4.197	3.846	4.246	3.846
1	VUGFEL	4.332	3.771	4.342	3.719	3.719
1	VUGFIP	4.354	4.03	4.209	3.679	3.679
1	VUGFIP	3.789	4.069	4.008	4.249	3.789
1	VUGFOV	4.142	4.118	3.808	4.08	3.808
1	VUGFOV	4.033	3.755	4.263	4.09	3.755
1	WOBSIT	4.067	4.131	3.986	3.979	3.979
1	WOBSIT	3.906	3.777	4.58	4.285	3.777
1	WOBSOZ	4.227	4.677	3.709	3.999	3.709
1	XABPUN	4.157	4.144	4.157	4.144	4.144
1	XABPUN01	4.15	4.152	4.15	4.152	4.15
1	XATTEU	3.77	3.607	4.648	4.73	3.607
1	XATTEU	4.327	4.416	3.944	3.989	3.944
1	XATTIY	3.408	4.801	3.635	4.822	3.408
1	XIJXEU	4.604	3.401	4.605	4.09	3.401
1	YUDZIJ	4.138	4.212	4.138	4.212	4.138
1	YUDZOP	3.63	3.785	4.683	4.474	3.63
1	YUDZOP	4.435	3.941	4.385	3.701	3.701
1	YUDZOP01	4.57	3.761	4.57	3.761	3.761
1	YUFBOT	3.459	3.597	4.913	4.684	3.459
1	YUTTAL	3.766	3.874	4.521	4.537	3.766
1	ZETYIK	4.637	4.111	4.118	3.747	3.747
1	ZETYUW	3.695	4.098	4.238	4.421	3.695

## Sheet: combined
BABNUR	3.94		Min
BAGDAS	3.712
CADNOO	3.553		Mean	3.65419
EJUXEP	3.67		Standard Error
IJOHAT	3.943		Median	3.702
IJOHEX	3.906		Mode	3.27
IKUKIL	3.726		Standard Deviation	0.250359
IKULEI	3.596		Sample Variance	0.0626795
OJOHIH	3.594		Kurtosis	0.331446
OJOHIH01	3.608		Skewness	-0.767742
OJOHIH02	3.616		Range	1.373
OJOHIH03	3.624		Minimum	2.832
OJOHIH04	3.633		Maximum	4.205
OJOHIH05	3.64		Sum	3263.19
QACVAV	3.994		Count	893
RADJAL	3.966
RADJAL	3.811
RADJAL	3.837
ULEWAM	3.865
ULEWAM	3.907
ULEWEQ	3.678
ULEWIU	4.178
ULEWUG	3.925
AFOCEE	3.637
AFUPEZ	3.819
AFUPID	3.78
AFUPID	3.892
AFUPOJ	3.811
AFUPUP	3.782
AFUPUP	3.832
AFUQAW	3.714
AGUVIK	3.855
AGUVIK	3.617
AGUVOQ	3.74
AGUVOQ	3.674
AGUYAF	3.84
AKONAQ	3.607
AKONEU	3.818
AKONIY	3.718
AKONUK	3.854
AMOHIV	3.826
AMOHIV	3.722
AMOHOB	3.818
AMOHOB	3.838
AMOHOB	3.829
AMOHUH	3.588
AMOHUH	3.582
AMOJAP	3.612
AMOJAP	3.656
AVIDEQ	3.891
AVIDIU	3.54
AVIDOA	3.705
AVIDUG	3.939
AVIFAO	3.631
AVIFES	3.742
AVIFIW	3.694
AVIFOC	3.569
BAJQAG	3.688
BAJQAG	3.764
BAJQAG	3.678
BAJQAG	3.783
BAJQEK	3.854
BAJQEK	3.683
BAJQIO	3.71
BAJQIO	3.649
BAJQOU	3.739
BAJQUA	3.716
BIBPIM	3.766
BIBPOS	3.768
BIBPOS	3.8
BIBPOS	3.781
BIBPOS	3.85
BIBPOS	3.794
BIBPOS	3.939
BIBPOS	3.909
BIBPOS	3.97
BIBPUY	3.791
BISZIO	3.763
BISZIO	3.543
BISZIO	3.671
BISZIO	3.575
BISZOU	3.735
BISZOU	3.785
BODKAJ	3.573
BODKEN	3.718
BODKIR	3.707
BODPES	3.908
BODPIW	3.626
BODPOC	3.828
BOLHIW	3.803
BOLHOC	3.935
BOLHUI	3.588
BOLJAQ	3.738
BOLJAQ	3.577
BUJWEL	3.653
BUJWEL	3.816
BUJWIP	3.684
BUJWIP	3.677
BUJWIP	3.838
BUJWIP	3.735
BUJWIP	3.799
BUJWIP	3.711
BUJWIP	3.585
BUJWIP	3.785
CEDHOJ	3.721
CEDHUP	3.578
CERKES	3.701
CEZDUH	3.73
CEZDUH	3.709
CIDGIG	3.838
CIRZUZ	3.534
CIRZUZ	3.511
CIRZUZ01	3.523
CODGUZ	3.652
CODGUZ	3.68
CODHAG	3.738
COXSIT	3.843
CUNVEO	3.522
CUNVEO	3.529
CUNVIS	3.543
CUNVIS	3.555
CUNVOY	3.699
CUNVOY	3.564
CUNVUE	3.635
CUNWAL	3.625
CUNWAL	3.627
DEGVOB	3.836
DEGVUH	3.764
DELFIM	3.578
DIMHAL	3.798
DOFVUR	3.808
DOFWAY	3.765
DOFWEC	3.539
DOFWEC	3.948
DOWQIS	3.843
DOWQIS	3.868
DOWRAL	3.951
DOWREP	3.649
DOWRIT	3.912
DOZVUM	3.651
DOZWIB	3.71
DOZWIB	3.648
DUMDOG	3.742
EDEKAB	3.802
EDEKEF	3.606
EGEJIM	3.705
EGEJIM	3.681
EHEBOK	3.967
EHEBOK	3.945
EHEBUQ	3.564
EHEBUQ	3.812
ENUWER	3.447
EVAHEO	3.813
EVAHEO01	3.845
EVICER	3.669
EVICIV	3.821
EVICIV	3.746
EVICOB	3.666
EWEJAT	3.671
FAFYAO	3.924
FAFYES	3.722
FAGBAS	3.654
FENDEJ	3.562
FENDIN	4.015
FENDIN	3.884
FIQVUZ	3.581
FOBHUC	3.643
FOBJAK	3.625
FOBJAK	3.856
FOBJEO	3.633
FOBJEO	3.614
FOBJIS	3.586
FORDAU	3.675
FORDEY	3.59
FORDEY	3.874
FORDIC	3.719
FORDIC	3.621
FORDOI	3.784
FORDUO	3.676
FORFAW	3.614
FORFEA	3.758
FORFEA	3.81
FORFIE	3.793
GADZET	3.582
GADZET	3.548
GERLIB	3.862
GEVDOD	3.868
GEVDUJ	3.643
GOQSUC	3.82
GOQTAJ	3.832
GOQTAJ	3.751
GOTGIH	3.79
GOTGIH	3.544
GOTGIH	3.587
GOTGIH	3.622
GUFJIC	3.736
GUFVAG	3.762
GUFVEK	3.854
GUFVIO	3.645
GUJNOR	3.731
GUJNOR	3.826
HEPTAY	3.9
HEPTAY	3.934
HEPTAY	3.844
HETWUB	3.77
HETWUB	3.798
HEWGIC	3.302
HEWPIL	3.904
HEWPOR	3.854
HOBPAR	3.742
HOBPAR	3.607
HOKSEI	3.769
HUTVIE	3.708
ICADEY	3.826
INUSOA	3.784
INUSOA	3.45
INUSUG	3.855
INUTAN	3.619
ITAYUZ	3.882
ITAZAG	3.76
ITAZIO	3.79
IYAWIP	3.74
IYAWOV	3.768
IYAWOV	3.757
JANYIJ	3.794
JEZSUF	3.665
JEZTAM	4.028
JEZWOD	3.614
JOVNOZ	3.804
JOVNOZ	3.794
KAMCOT	3.935
KAQSON	3.715
KAQSUT	3.95
KAVBAN	3.466
KAYSOV	3.745
KAYSUB	3.668
KECVAS	3.73
KECVAS	3.91
KECVAS	3.924
KEHHOX	3.891
KEKKUJ	3.66
KEKKUJ	3.933
KEKLAQ	3.676
KEKLAQ	3.941
KEMVOP	3.626
KIKKAS	3.806
KIQYAM	3.766
KIQYAM	3.648
KIQYEQ	3.597
KIQYIU	3.695
KIWNUB	3.715
KIWPAJ	3.717
KIWPEN	3.734
KIWPIR	3.794
KIWPOX	3.797
KIWPOX	3.824
KIWPUD	3.733
KUWLUK	3.73
KUWMAR	3.575
LAJMUG	3.652
LAJNAN	3.818
LUJVUI	3.809
LUJWAP	3.615
LUJWAP	3.685
LUJWET	3.387
LUJWET	3.581
LUKKUA	3.78
LUKLAH	3.703
LUKLAH	3.821
LUVZIO	3.663
LUVZOU	3.722
LUVZUA	3.705
LUWBAJ	3.7
LUWBEN	3.857
LUWBEN	3.982
MALYOP	3.748
MALYUV	3.866
MEQZAM	3.476
MOHXEO	3.645
MOHXOY	3.65
MOHXOY	3.606
MUSWAA	3.972
NAMWUW	3.796
NAMXAD	3.868
NAZPAI	3.529
NAZPAI	3.801
NETLOQ	3.806
NETLUW	3.849
NETMAD	3.882
NETMEH	3.766
NETMIL	3.761
NETMOR	3.772
NETMUX	3.672
NETMUX	3.603
NIHXAG	3.702
NIHYEL	4.066
NIHYEL	4.048
NIHZOV	3.738
NIJBIT	3.688
NIWROD	3.748
NIWSAQ	3.708
NOSNEQ	3.558
NOSNIU	3.913
NOSNOA	3.662
NOSNOA	3.482
NOSNOA	3.618
NOSNOA	3.7
NOSNUG	3.71
NOSNUG	3.778
NURYUX	3.586
NURYUX	3.769
NURYUX	3.676
NURYUX	3.629
NURZAE	3.497
NURZAE	3.746
NUSCAI	3.775
OSEJUS	3.989
OSEKAZ	3.776
OXUFAP	3.249
OXUFAP	3.249
OXUFAP	3.249
OXUFAP	3.249
OXUFAP	3.249
OXUFAP	3.249
OXUFAP	3.249
OXUFAP	3.249
OXUFAP	3.249
OXUFAP	3.27
OXUFAP	3.27
OXUFAP	3.27
OXUFAP	3.27
OXUFAP	3.27
OXUFAP	3.27
OXUFAP	3.27
OXUFAP	3.27
OXUFAP	3.27
PEMXIP	3.828
PEMXIP01	3.665
PEMXOV	3.815
PEPKOM	3.861
PEPKUS	3.838
PEPKUS	3.816
PIPKIL	3.683
PITCED	3.586
PITCED	3.675
PITCIH	3.837
PITCUT	3.636
PITCUT	3.661
PITDAA	3.673
PITDAA	3.646
PITDEE	3.603
PITDEE	3.576
PITDEE	3.706
PITDEE	3.896
POFXAL	3.704
POFXAL	3.695
POGCEV	3.971
POGYIV	3.825
POKNEK	3.512
POKNIO	3.837
POKNOU	3.827
POKNUA	3.486
POKPAI	3.713
POKPEM	3.631
PUBRAI	3.55
PUBRAI	3.651
PUBREM	3.578
PUQWEF	3.759
PUQWEF	3.747
PUQWEF	3.846
PUQWEF	3.718
PUQWIJ	3.595
PUQWIJ	3.797
PUTZEM	3.6
QAXKAC	4.004
QEGTII	3.818
QENLON	4.069
QENMOO	3.773
QENMOO	3.766
QENMOO	3.716
QENMOO	4.035
QENMUU	3.66
QICVUU	3.824
QICVUU	3.893
QICWAB	3.818
QICWEF	3.855
QICWIJ	3.917
QIFXOU	3.701
QIFXOU	3.771
QIFZIQ	3.609
QIFZOW	3.552
QIFZUC	4.007
QIGBAL	3.781
QIGBAL	4
QIGBEP	3.763
QIGBIT	3.672
QIGBIT	3.655
QIGBOZ	3.605
QIGBOZ	3.551
QIGBUF	3.786
QIGCAM	3.752
QOMDIH	3.584
QUBZIX	3.827
RAKDUE	3.774
RENYOB	3.887
RENYOB	3.942
RESGAZ	3.78
RESZEW	3.587
ROQPOE	3.82
RUMKAN	3.901
RUMKER	3.959
RUMKIV	3.767
RUMKOB	3.843
RUMKUH	3.766
RUMKUH	3.79
SEQRAI	3.761
SEQREM	3.823
SEQREM	3.558
SESNOV	3.924
SESNUB	3.552
SESPAJ	3.645
SETJEJ	3.665
SETKOS	3.669
SIJJIH	3.984
SILZOE	3.772
SINQAK	3.726
SOQZUV	3.689
SORNOE	3.694
SORNUK	3.608
SORPAS	3.819
SORPEW	3.791
SORPIA	3.72
SORPOG	3.761
SORPUM	3.847
SUGPES	3.604
TAJQIH	3.732
TATTIT	3.689
TAVRUF	3.734
TAXGUX	3.78
TOQRUO	3.73
TOQSAV	3.657
TOQSEZ	3.654
TOQSOJ	3.64
TOQSOJ	3.762
TOQSUP	3.626
TOVPIG	3.661
TOVPOM	3.89
UFAVUV	3.718
UFOROX	3.65
UFOROX	3.777
UFORUD	3.708
UFORUD	3.608
UJOVEV	3.586
UJOVEV	3.6
UJOVIZ	3.68
UJOVIZ	3.445
UJOVOF	3.909
UWIMUK	3.624
UYUSIS	3.707
VAFLOF	3.836
VAFLUL	3.885
VAFMAS	3.87
VEVSAS	3.941
VUCKIP	3.688
VUCKIP	3.459
VUPYOW	3.828
VUPYOW	3.823
VUPYUC	3.986
VUQBIU	3.816
WAPKAC	3.733
WAPKAC	3.816
WAPKEG	3.726
WAPKEG	3.647
WAXMOA	3.874
WICCET	3.768
WISJEQ	3.818
WOCWUI	3.88
WOCYET	3.61
WOCYIX	3.834
WUDXAX	3.763
WUDXEB	3.989
WUDYAY	3.744
WUTBOF	3.681
WUTBOF	3.58
WUTBUL	3.96
WUTCAS	3.92
WUTCAS	4.153
WUTCAS	4.134
WUTCEW	3.723
WUTCIA	3.626
WUWPUB	3.556
WUWQAI	3.69
WUWQAI	3.615
WUWQEM	3.319
WUWQEM	3.518
XATTAQ	3.731
XAXQET	3.702
XAXQIX	3.862
XAXQOD	3.88
XEJZOE	3.816
XEJZOE	3.875
XEJZUK	4.119
XENNIO	3.863
XESVEY	3.881
XIJXUK	3.554
XIKZIC	4.027
XIQGEK	3.757
XIWFAN	3.625
XODQOZ	3.627
XODQOZ	3.561
XODQUF	3.627
XODQUF	3.572
XODQUF	3.514
XODQUF	3.586
XODRAM	3.686
XODRAM	3.561
XODREQ	3.684
XODREQ	3.575
XODRIU	3.351
XODRIU	3.808
XODROA	3.633
XODROA	3.551
XODRUG	3.595
XODRUG	3.577
XODSAN	3.613
XODSAN	3.549
XODSER	3.624
XODSIV	3.656
XODSOB	3.69
XODSOB	3.56
XODSUH	3.711
XODSUH	3.556
XODTAO	3.61
XODTES	3.62
XODTES	3.661
XODTIW	3.513
XODTUI	3.498
XODTUI	3.727
XODTUI	3.698
XODTUI	3.558
XODVAQ	3.528
XODVAQ	3.695
XODVEU	3.321
XODVEU	3.683
XODVIY	3.681
XODVIY	3.739
XODVOE	3.785
XODVUK	3.426
XODVUK	3.68
XOHFOQ	3.676
XUPVUA	3.726
YIZBUG	3.606
YIZBUG	3.579
YOQMID	3.483
YOQMID	3.68
YOQSAB	3.956
YOQTUW	3.708
YOQTUW	3.523
YOQWAF	3.785
YOQWOT	3.514
YOQWOT	3.795
YOQWUZ	3.67
YOQXAG	3.556
YOQXEK	3.847
YOZXAP	3.862
YOZXAP	3.577
YUCYON	3.898
YUDZEF	3.685
YUFBAF	3.67
YUFBEJ	3.75
YUFBIN	3.615
YUGHIU	3.65
APUBUL	3.771
ENEFEL	3.866
ENEFEL	3.911
IMOMUV	3.869
IMUXUM	3.78
IMUXUM	3.85
IMUXUM	3.788
IMUXUM	3.822
IMUXUM	3.929
IMUYAT	3.41
IRUQIY	3.865
OROXOL	3.591
OROXUR	3.733
ATANUH	3.629
ITOGOQ	3.907
ITOGOQ	3.76
IYOCIL	3.73
IYOCIL	3.752
IYOCIL	3.786
IYOCIL	3.754
IYOCOR	4.154
IYOCOR	4.205
IYOLAM	3.743
IYOLAM	3.914
IYOLEQ	4.056
IYOLOA	4.053
IYOLUG	3.825
IYOMAN	3.738
IYOMER	4.155
IYOMER	4.067
IYOMIV	3.796
IYOMIV	3.944
OVAQAG	3.557
OVAQAG	3.673
OXAWAO	4.192
OXAWAO	3.831
NUYVIQ	4.003
NUYVOW	3.911
NUZCOE	3.84
RUZKEG	3.986
AGUXIM	3.943
AGUXIM	3.506
AGUXOS	3.931
AGUXOS	3.449
AKOROK	3.844
AMOJET	3.83
AMOJIX	3.78
BABNOL	3.878
BAGDIA	3.797
BOLHES	3.893
BOLJEU	3.72
CADNII	3.677
CILJAJ	3.703
CILJEN	3.73
CIMBOS	3.578
CIMBOS	3.425
CISBAI	3.641
CISBAI	3.909
CISBEM	3.766
CISBEM	3.904
CISBIQ	3.756
CISBOW	3.827
DOZWOH	3.927
EVUGUA	3.848
EVUGUA	3.709
EVUGUA	3.787
EVUGUA	3.708
EWEGUK	3.527
EWEHIZ	4.135
EWOQEO	4.062
EWOQIS	3.714
FIJFIQ	3.609
FOCTUQ	3.751
FOCVAY	3.808
FOCVAY	3.466
FOCVAY	3.956
FUTKUB	3.895
GEFBUS	4.087
GOQSUC	4.001
GUKBIB	3.545
HEPSUR	3.529
HEPSUR	3.549
HOBNOD	3.769
HOBNUJ	3.738
HOBPEV	3.663
HOBPEV	3.809
HOBPEV01	3.887
JUVMOF	4.097
JUVMOF	4.116
KAQVOQ	4.145
KAQVOQ	4.094
KEHQAQ	4.133
KIQYOA	4.117
KUFGUO	3.881
KUMJOU	3.8
KUMJUA	3.923
KUMJUA	3.766
MAGYOK	3.864
MOXSEA	3.665
MOXSEA	3.922
NIHZIP	3.856
NIHZIP	3.924
NIHZUB	3.755
NIJBAL	3.737
NIXLIQ	4.134
NONVIW	3.944
OJOFID	4.052
ORUMIZ	3.52
ORUMOF	3.479
PAPDOA	3.621
PEMXUB	3.694
QEGDOX	3.598
QICWOP	3.701
QIFZIQ	3.94
QIFZOW	3.704
QIRNAK	3.689
QIRNAK	3.605
QIRNAK	3.493
QIRNAK	3.632
QIRNIS	3.595
QOMDED	3.69
QOMDON	4.031
QOMDON	3.767
QOMDUT	3.83
REBLUH	3.976
RENYER	3.775
RENYER	3.908
RESFEC	4.127
REVHIK	3.67
RIYQID	3.253
RIYSOL	3.425
RONWIE	3.903
RUJWEB	3.771
RUMJEQ	3.901
RUMJEQ	3.784
RUMJIU	3.699
RUMJOA	4.159
RUMJUG	3.745
RUMWON	3.968
RUMWON	3.598
RUMWON01	3.893
RUMWUT	3.91
RUMWUT	3.71
RUMXAA	3.811
RUMXAA	3.599
SARFAU	3.578
SARFAU	3.797
SEQRIQ	3.866
SILZUK	3.908
TAQQEK	3.726
TAQQEK	3.656
TATTEP	3.902
TATTEP	3.816
TOCKOO	3.711
TOCKOO	3.599
TOCLAB	3.827
TOCLAB	3.953
UBECOX	3.667
UBECOX	3.541
UTOCIQ	3.701
VAFNAT	3.528
VUGFEL	3.846
VUGFEL	3.719
VUGFIP	3.679
VUGFIP	3.789
VUGFOV	3.808
VUGFOV	3.755
WOBSIT	3.979
WOBSIT	3.777
WOBSOZ	3.709
XABPUN	4.144
XABPUN01	4.15
XATTEU	3.607
XATTEU	3.944
XATTIY	3.408
XIJXEU	3.401
YUDZIJ	4.138
YUDZOP	3.63
YUDZOP	3.701
YUDZOP01	3.761
YUFBOT	3.459
YUTTAL	3.766
ZETYIK	3.747
ZETYUW	3.695
CISBUC	3.222
CISBUC	3.222
CISBUC	3.222
CISBUC	3.444
CISBUC	3.222
CISBUC	3.222
CISCAJ	3.281
CISCAJ	3.015
CISCAJ	3.041
CISCAJ	3.015
CISCAJ	3.041
CISCAJ	3.322
CISCAJ	3.281
CISCAJ	3.015
CISCAJ	3.041
CISCAJ	3.015
CISCAJ	3.041
CISCAJ	3.433
CISCAJ	3.015
CISCAJ	3.428
CISCAJ	3.015
CISCAJ	3.041
CISCAJ	3.322
CISCAJ	3.041
CISCAJ	3.162
CISCAJ	3.223
CISCAJ	3.332
CISCAJ	3.223
CISCAJ	3.162
CISCAJ	3.256
CISCAJ	3.162
CISCAJ	3.223
CISCAJ	3.429
CISCAJ	3.223
CISCAJ	3.162
CISCAJ	3.43
CISCAJ	3.223
CISCAJ	3.162
CISCAJ	3.223
CISCAJ	3.332
CISCAJ	3.256
CISCAJ	3.162
PAPDEQ	3.343
PAPDEQ	3.263
QIFZUC	3.35
RESGIH	3.317
TUKGUC	3.254
TUKGUC	3.252
TUKGUC	3.18
TUKGUC	3.208
VAFMEW	3.232
VAFMEW	3.176
VAFMEW	3.232
VAFMEW	3.176
VAFMEW	3.314
VAFMEW	3.176
VAFMEW	3.192
VAFMEW	3.305
VAFMEW	3.192
VAFMEW	3.305
VAFMEW	3.192
VAFMEW	3.356
VAFMEW	3.176
VAFMEW	3.192
VAFMEW	3.176
VAFMEW	3.192
VAFMEW	3.176
VAFMEW	3.192
VAFMIA	3.355
VAFMIA	3.283
VAFMIA	3.283
VAFMIA	3.35
VAFMIA	3.283
VAFMIA	3.283
VAFMIA	3.35
VAFMIA	3.283
VAFMIA	3.283
VAFMOG	3.063
VAFMOG	3.063
VAFMOG	3.063
VAFMOG	3.121
VAFMOG	3.412
VAFMOG	3.121
VAFMOG	3.063
VAFMOG	3.063
VAFMOG	3.063
VAFNEX	3.378
VAFNEX	3.239
VAFNIB	3.308
VAFNIB	3.348
VAFNIB	3.459
VAFNIB	3.293
XATTUK	3.277
YUHREB	3.177
YUHREB	3.197
YUHRIF	3.221
YUHRIF	3.221
YUHRIF	3.221
YUHRIF	3.221
YUHRIF	3.221
YUHRIF	3.221
YUHRIF	3.305
YUHRIF	3.305
YUHRIF	3.305
ZAKFEZ	3.712
ZAKFID	3.7
ZUZKOX	3.127
AMOGIU	3.301
AMOGIU	3.173
AMOGIU01	3.213
AMOGOA	3.159
AMOJOD	3.258
AMOJOD	3.165
AMOJUJ	3.225
AMOKAQ	3.202
BITPUS	3.235
BITPUS	3.276
BITYOV	2.868
BITYUB	3.298
CISCEN	3.006
GAQZOQ	2.93
GAQZOQ	2.832
GAQZOQ	2.922
GAQZOQ	2.919
GAQZOQ	2.936
GAQZOQ	3.018
HEPSOL	3.307
QIGBAL	3.09
QIGBAL	3.195
RIPWAR	3.297
SAYYOJ	3.215
SAZCUU	3.297
WOZREK	3.268
WOZSAH	3.27
XATTOE	2.963
XATTOE	2.91
YUDZUV	3.306

## Sheet: 2,6-iPr2_net
Refcode	DIST1	DIST2	DIST9	DIST10	DIST3	DIST4	DIST5	DIST6	DIST7	DIST8	DIST11	DIST12	min		Min
AFOCEE	3.972	3.898	4.415	4.268	3.708	5.486	3.87	5.407	5.933	3.923	5.768	3.637	3.637
AFUPEZ	3.819	4.501	3.848	4.321	5.251	3.86	5.781	5.09	4.923	4.56	3.985	5.822	3.819		Mean	3.72183
AFUPID	3.78	3.997	4.082	3.892	4.963	4.192	4.717	4.279	4.387	5.454	4.499	4.45	3.78		Standard Error
AFUPOJ	4.15	4.299	4.07	4.123	5.602	4.131	5.664	4.634	4.871	5.177	3.811	5.699	3.811		Median	3.7215
AFUPUP	3.782	4.18	3.995	4.329	4.642	4.853	4.976	3.832	4.068	5.481	3.821	4.701	3.782		Mode	3.818
AFUQAW	4.183	4.266	4.045	4.221	3.803	5.707	3.714	5.768	4.067	5.514	5.731	4.02	3.714		Standard Deviation	0.143697
AGUVIK	3.879	3.855	3.617	4.289	4.523	4.198	4.596	4.099	4.15	4.819	4.234	3.859	3.617		Sample Variance	0.0206488
AGUVOQ	4.157	3.674	4.068	4.181	4.03	3.822	3.754	4.991	3.851	5.504	3.879	3.74	3.674		Kurtosis	0.336795
AGUYAF	4.044	4.073	4.118	4.328	4.601	5.576	4.469	5.426	3.84	5.65	5.849	3.936	3.84		Skewness	0.0673854
AKONAQ	4.038	4.48	3.683	4.377	5.544	3.8	5.99	4.051	5.147	3.607	3.94	5.901	3.607		Range	0.929
AKONEU	4.452	3.818	4.452	3.818	5.912	4.65	4.764	4.044	5.912	4.65	4.044	4.764	3.818		Minimum	3.249
AKONIY	4.295	4.336	3.89	4.091	3.914	5.832	5.871	3.918	3.821	5.387	5.616	3.718	3.718		Maximum	4.178
AKONUK	4.115	3.854	4.296	4.329	5.545	4.21	5.083	4.513	5.813	3.919	4.912	5.604	3.854		Sum	1533.39
AMOHIV	3.919	4.197	4.032	4.056	5.326	3.978	5.726	3.976	5.463	3.722	3.826	5.563	3.722		Count	412
AMOHOB	4.171	3.91	3.938	4.244	5.672	3.818	5.364	4.205	5.332	4.152	3.829	5.771	3.818
AMOHUH	3.588	4.097	3.693	4.142	4.839	3.863	5.608	3.87	5.197	3.582	4.061	5.528	3.582
AMOJAP	4.214	3.914	4.069	4.012	3.612	5.708	3.656	5.427	3.746	5.583	5.522	3.712	3.612
APUBUL	4.402	4.273	4.051	4.026	4.955	5.881	5.793	3.989	5.584	3.771	5.525	4.029	3.771
ATANUH	4.605	4.428	3.972	3.854	4.505	6.119	4.395	5.945	3.913	5.487	5.374	3.629	3.629
AVIDEQ	4.486	4.069	4.486	4.069	6.012	4.313	3.891	5.587	6.012	4.313	5.587	3.891	3.891
AVIDIU	4.038	4.014	4.308	4.42	5.551	3.54	3.688	5.504	4.659	5.705	4.003	5.948	3.54
AVIDOA	4.314	3.923	4.432	4.115	5.839	4.062	3.705	5.443	4.183	5.958	5.628	3.933	3.705
AVIDUG	4.537	3.939	4.537	3.939	6.053	4.103	5.372	4.172	6.053	4.103	4.172	5.372	3.939
AVIFAO	4.321	4.608	3.676	4.051	5.839	3.855	6.122	4.325	3.833	5.142	3.631	5.565	3.631
AVIFES	4.409	4.251	4.204	4.138	5.872	4.589	4.029	5.766	3.742	5.704	4.083	5.617	3.742
AVIFIW	4.169	4.367	4.185	4.265	5.685	3.694	4.579	5.796	4.071	5.684	4.053	5.779	3.694
AVIFOC	4.261	4.244	4.157	4.103	5.796	3.994	5.759	4.014	5.673	3.994	3.569	5.605	3.569
BABNUR	3.94	4.589	3.945	4.509	5.085	4.586	5.066	5.963	4.722	5.033	4.894	5.899	3.94
BAGDAS	3.916	4.426	3.845	4.403	5.303	4.235	5.939	3.949	3.712	5.336	3.929	5.917	3.712
BAJQAG	3.688	3.941	4.053	3.678	4.936	4.299	5.423	3.803	5.565	3.723	4.454	4.734	3.678
BAJQEK	3.9	4.295	3.777	4.37	4.052	5.367	3.854	5.826	3.683	5.089	5.886	4.001	3.683
BAJQIO	4.335	3.966	4.138	3.816	5.868	4.062	5.515	3.712	5.659	3.976	3.649	5.332	3.649
BAJQOU	4.289	4.186	4.002	3.927	5.815	3.927	5.702	3.784	5.524	3.739	3.871	5.428	3.739
BAJQUA	4.095	4.223	4.166	4.134	3.716	5.616	3.847	5.743	4.255	5.634	5.656	3.753	3.716
BIBPIM	4.406	4.263	4.138	3.822	3.833	5.881	4.43	5.683	3.766	5.653	5.332	3.783	3.766
BIBPOS	3.768	3.909	3.781	3.85	3.939	4.092	4.002	5.372	4.047	4.353	5.277	4.016	3.768
BIBPUY	4.073	4.239	3.985	4.316	3.824	5.591	5.681	4.33	4.012	5.429	5.83	3.791	3.791
BISZIO	3.575	3.543	4.06	3.813	3.602	4.046	3.691	4.876	3.899	3.763	3.773	3.671	3.543
BISZOU	3.86	3.845	4.234	4.265	3.785	3.753	3.802	5.313	3.735	5.737	4.326	5.744	3.735
BODKAJ	4.673	3.8	4.235	3.903	6.182	4.204	3.683	5.318	5.747	4.148	5.394	3.573	3.573
BODKEN	3.725	4.132	4.123	4.414	3.718	5.234	5.658	3.984	3.757	5.651	5.874	3.858	3.718
BODKIR	4.168	3.99	4.397	3.917	5.653	4.275	5.514	3.792	4.495	5.887	3.707	5.44	3.707
BODPES	4.159	3.989	4.474	4.387	5.653	4.239	4.666	5.229	5.955	3.908	5.761	4.886	3.908
BODPIW	3.724	4.306	4.017	4.625	3.844	5.183	4.275	5.82	3.626	5.541	4.046	6.071	3.626
BODPOC	3.828	4.241	4.285	4.542	5.003	4.556	4.471	5.692	5.609	4.822	5.917	5.013	3.828
BOLHIW	4.133	4.309	3.885	4.256	3.803	5.657	4.245	5.812	4.11	5.334	5.785	3.818	3.803
BOLHOC	4.118	4.122	4.118	4.122	5.648	3.935	3.977	5.634	5.648	3.935	5.634	3.977	3.935
BOLHUI	3.885	4.271	3.92	4.582	5.399	3.588	5.787	4.217	4.534	5.178	6.088	3.997	3.588
BOLJAQ	4.02	3.749	3.979	4.01	3.577	3.912	5.211	3.738	3.837	5.5	3.783	5.544	3.577
BUJWEL	3.845	3.931	4.133	4.331	5.36	3.653	5.409	3.816	5.653	3.962	4.287	5.84	3.653
BUJWIP	3.881	3.785	3.735	3.916	3.926	3.646	3.684	3.677	3.856	3.585	4.08	3.92	3.585
CADNOO	4.863	3.677	4.897	3.553	5.344	6.217	4.364	4.858	5.316	6.306	4.689	4.166	3.553
CEDHOJ	4.364	4.102	4.144	3.821	4.164	5.875	5.614	3.831	5.671	3.955	5.312	3.721	3.721
CEDHUP	3.8	4.225	4.103	4.588	4.382	4.904	3.816	5.754	3.578	5.616	6	4.923	3.578
CERKES	4.312	4.629	4.033	3.701	5.777	3.818	4.262	6.156	5.535	4.025	5.186	3.864	3.701
CEZDUH	3.867	3.895	3.953	4.18	3.85	5.338	3.709	3.894	3.73	4.025	4.091	4.012	3.709
CIDGIG	4.026	4.01	4.149	4.211	5.525	3.968	3.838	5.535	5.659	4.073	3.972	5.74	3.838
CIRZUZ	4.265	3.991	4.409	4.293	3.511	3.534	4.883	4.209	4.555	5.87	4.455	4.515	3.511
CODGUZ	4.175	3.953	4.202	3.998	3.652	5.682	4.234	4.147	3.68	5.712	5.514	3.911	3.652
CODHAG	4.428	3.963	4.352	3.755	3.878	5.909	3.738	5.48	3.906	5.881	5.091	4.166	3.738
COXSIT	4.064	4.463	3.843	4.262	5.284	4.691	4.53	5.931	4.645	4.869	4.132	5.83	3.843
CUNVEO	3.591	4.227	3.683	3.824	5.072	3.522	4.275	3.59	3.546	3.529	3.671	5.326	3.522
CUNVIS	3.766	3.892	3.914	3.731	3.543	5.274	3.745	3.923	3.569	5.434	3.555	5.204	3.543
CUNVOY	3.652	3.877	4.281	3.918	3.699	3.564	3.921	3.785	5.819	3.77	3.874	5.427	3.564
CUNVUE	3.935	4.588	3.713	4.398	3.656	5.454	6.099	4.21	5.235	3.635	5.906	3.834	3.635
CUNWAL	3.627	3.926	4.023	3.93	3.661	3.911	5.46	3.665	3.685	5.495	5.174	3.625	3.625
DEGVOB	4.276	4.267	4.108	3.915	5.8	4.109	3.915	5.785	3.836	5.636	5.273	4.489	3.836
DEGVUH	4.205	4.401	4.111	3.889	3.782	5.724	4.001	5.919	4.276	5.566	5.403	3.764	3.764
DELFIM	3.578	4.355	3.918	4.743	4.967	3.77	4.583	5.819	3.799	5.453	4.496	6.277	3.578
DIMHAL	4.299	4.336	4.038	3.889	4.119	5.817	3.906	5.823	3.798	5.49	5.438	3.919	3.798
DOFVUR	4.32	3.867	4.432	3.847	5.749	4.629	5.132	4.299	3.995	5.959	3.808	5.323	3.808
DOFWAY	3.765	4.016	4.253	4.404	4.231	5.063	5.219	4.684	5.778	3.917	3.788	5.889	3.765
DOFWEC	4.162	4.117	3.949	4.208	3.948	5.626	4.573	4.283	3.539	5.268	5.448	3.642	3.539
DOWQIS	4.245	3.847	4.338	3.92	5.768	3.987	4.524	5.066	3.843	4.207	4.036	3.868	3.843
DOWRAL	4.091	3.951	4.371	4.282	5.617	3.984	4.305	5.358	5.823	4.304	4.007	5.806	3.951
DOWREP	3.949	3.656	4.846	4.513	3.649	5.46	4.721	4.493	5.329	6.203	4.814	5.939	3.649
DOWRIT	4.082	4.261	4.082	4.261	3.912	5.602	4.029	5.785	3.912	5.602	5.785	4.029	3.912
DOZVUM	4.062	4.384	4.07	4.085	5.57	3.876	5.895	3.919	3.651	5.594	3.987	5.603	3.651
DOZWIB	3.876	4.107	3.961	3.999	3.71	5.39	5.637	3.841	3.729	5.471	3.648	5.506	3.648
DUMDOG	3.783	3.938	4.335	4.451	5.223	3.961	3.742	5.409	4.04	5.86	4.417	5.975	3.742
EDEKAB	4.345	4.324	4.357	3.802	3.832	5.846	5.833	3.869	5.85	3.989	4.373	5.077	3.802
EDEKEF	4.245	4.074	4.195	4.055	3.967	5.75	5.571	3.606	5.704	3.925	5.557	4.016	3.606
EGEJIM	3.935	4.182	3.798	4.228	3.681	5.453	3.902	3.982	3.747	3.868	5.735	3.84	3.681
EHEBOK	4.05	4.025	4.499	4.067	4.14	5.314	3.945	3.967	5.083	5.08	5.415	4.563	3.945
EHEBUQ	4.308	3.695	3.822	3.911	4.185	5.833	3.564	4.299	3.87	5.207	3.812	3.974	3.564
EJUXEP	4.162	4.223	4.022	4.164	5.684	4.035	4.084	5.747	3.821	5.54	5.669	3.67	3.67
ENEFEL	3.911	3.866	4.303	4.211	4.241	3.95	4.26	5.053	5.782	3.924	4.605	4.501	3.866
ENUWER	3.894	4.34	3.929	4.439	5.324	4.161	4.083	5.866	3.447	5.433	5.946	4.071	3.447
EVAHEO	4.099	4.182	4.099	4.182	5.661	3.813	3.899	3.867	5.661	3.813	3.867	3.899	3.813
EVICER	4.451	3.842	4.451	3.842	5.965	4.332	3.669	5.36	5.965	4.332	3.669	5.36	3.669
EVICIV	4.262	4.017	4.07	3.8	3.958	5.817	5.531	3.821	4.127	3.876	5.235	3.746	3.746
EVICOB	3.831	4.477	3.831	4.477	3.666	5.332	6.013	4.216	3.666	5.332	4.216	6.013	3.666
EWEJAT	3.99	4.323	3.728	4.535	5.474	3.968	5.799	3.764	5.236	3.671	6.004	4.605	3.671
FAFYAO	4.285	4.28	3.965	4.17	4.032	5.788	4.085	5.794	3.924	5.446	4.247	5.633	3.924
FAFYES	3.948	4.215	4.213	4.427	3.722	5.464	5.729	3.746	5.708	4.299	4.732	5.824	3.722
FAGBAS	3.654	4.386	3.845	4.583	4.385	4.729	5.904	4.259	5.356	3.775	4.128	6.095	3.654
FENDEJ	3.934	4.315	4.309	4.574	4.962	4.781	3.562	5.765	5.765	4.376	5.012	5.961	3.562
FENDIN	4.206	4.221	4.186	4.401	4.698	4.015	5.632	4.107	4.211	5.678	3.884	5.817	3.884
FIQVUZ	4.167	4.108	4.15	4.404	5.663	4.158	3.581	5.611	5.674	3.78	4.754	5.79	3.581
FOBHUC	4.669	3.995	4.319	3.643	6.175	4.171	5.542	3.663	4.239	5.836	3.983	5.014	3.643
FOBJAK	4.19	3.979	4.05	4.184	4.545	3.856	4.363	5.326	3.625	4.82	5.407	3.779	3.625
FOBJEO	3.967	3.959	3.966	3.967	3.614	4.379	3.633	4.396	3.76	4.228	5.44	4.123	3.614
FOBJIS	3.586	4.086	4.105	4.67	4.299	4.711	5.554	4.238	3.758	5.644	6.186	4.257	3.586
FORDAU	3.89	4.208	3.886	4.531	5.4	3.706	5.722	4.08	5.416	3.675	4.088	6.047	3.675
FORDEY	3.59	3.998	4.117	4.251	4.873	3.884	5.259	4.64	5.601	4.132	3.934	5.743	3.59
FORDIC	3.9	3.817	4.054	3.767	5.427	3.719	5.354	3.72	5.555	3.89	3.621	5.276	3.621
FORDOI	3.784	3.84	4.499	4.55	4.91	4.485	4.961	4.581	5.962	4.689	4.824	5.977	3.784
FORDUO	4.084	4.237	4.083	4.276	5.594	3.783	5.731	3.676	5.496	4.272	4.377	5.771	3.676
FORFAW	4.163	3.898	4.553	4.005	5.671	3.675	5.43	3.614	5.888	5.091	3.772	5.529	3.614
FORFEA	3.84	4.097	4.027	4.244	5.176	3.84	5.604	3.93	5.556	3.758	3.836	5.748	3.758
FORFIE	4.163	3.906	4.415	4.1	5.683	4.06	5.431	3.793	5.921	3.938	4.111	5.577	3.793
GADZET	4.186	3.666	4.335	3.952	5.691	3.582	3.814	3.843	5.844	3.736	5.485	3.548	3.548
GERLIB	3.912	4.525	3.978	4.244	3.969	5.391	5.932	4.875	3.862	5.474	3.927	5.774	3.862
GEVDOD	4.256	4.147	4.317	4.153	5.761	4.085	5.505	4.554	3.868	5.821	4.373	5.577	3.868
GEVDUJ	3.978	4.441	3.943	4.336	5.5	3.643	3.899	5.913	5.441	3.985	5.822	4.338	3.643
GOQSUC	4.616	4.28	4.235	3.82	3.925	6.038	3.994	5.8	3.942	5.74	5.02	4.499	3.82
GOQTAJ	4.233	3.945	4.343	3.99	4.082	3.832	3.751	4.232	4.088	4.299	4.027	4.116	3.751
GOTGIH	3.745	3.824	3.829	3.799	3.587	3.79	3.772	3.913	4.383	3.622	5.309	3.544	3.544
GUFJIC	3.752	3.971	4.455	4.359	3.984	5.186	5.492	3.736	5.972	4.315	4.187	5.883	3.736
GUFVAG	3.776	4.407	3.975	4.401	5.22	3.911	4.278	5.908	3.762	5.5	5.921	4.261	3.762
GUFVEK	4.084	3.854	4.525	4.139	5.583	3.906	5.026	4.633	6.018	4.6	3.928	5.66	3.854
GUFVIO	4.034	4.256	4.086	4.246	5.545	3.645	4.481	5.694	5.612	3.831	4.454	5.645	3.645
GUJNOR	3.731	3.83	4.271	4.294	4.802	4.23	5.278	3.826	5.809	3.965	4.065	5.83	3.731
HEPTAY	4.248	4.021	4.161	3.844	4.199	4.14	5.542	3.9	3.918	5.688	5.107	4.256	3.844
HETWUB	3.923	4.085	3.77	4.054	4.486	5.212	3.798	4.022	4.376	5.028	4.901	4.419	3.77
HEWGIC	3.977	3.82	4.363	4.291	3.748	5.5	3.302	5.336	3.677	5.81	5.719	4.572	3.302
HEWPIL	4.025	4.333	4.124	4.378	5.533	3.904	5.726	4.572	5.547	4.4	5.885	4.083	3.904
HEWPOR	4.412	4.385	3.854	3.912	5.893	4.463	5.905	4.271	5.099	4.495	5.172	4.564	3.854
HOBPAR	3.985	3.827	4.042	4.15	5.504	3.607	5.286	3.742	5.567	3.85	3.799	5.672	3.607
HOKSEI	4.024	4.341	4.001	4.233	4.061	5.494	3.993	5.888	3.769	5.61	5.799	3.979	3.769
HUTVIE	3.966	3.708	4.496	4.592	5.438	3.865	4.963	4.316	3.923	5.987	5.963	4.924	3.708
ICADEY	4.2	4.228	4.175	4.31	4.449	5.639	5.762	3.974	5.701	3.826	5.802	4.368	3.826
IJOHAT	4.473	3.989	4.587	3.956	5.86	3.943	5.155	4.649	6.092	4.247	4.317	5.344	3.943
IJOHEX	4.271	4.216	4.303	4.42	5.755	4.392	4.462	5.652	3.906	5.827	4.993	5.737	3.906
IKUKIL	4.209	4.268	3.99	3.922	3.934	5.737	3.726	5.76	3.902	5.517	5.432	3.915	3.726
IKULEI	4.001	4.448	3.848	4.273	3.596	5.506	4.575	5.901	3.695	5.341	5.772	4.193	3.596
IMOMUV	4.5	3.965	4.335	4.058	3.869	5.98	5.305	4.462	4.325	5.836	3.987	5.548	3.869
IMUXUM	3.78	3.929	4.019	3.975	5.213	3.822	5.281	3.788	5.43	3.822	3.788	5.457	3.78
IMUYAT	3.955	3.41	4.906	4.22	5.483	3.773	4.805	3.688	6.409	4.514	4.058	5.758	3.41
INUSOA	3.833	4.087	4.045	4.224	3.45	3.794	5.567	3.784	3.929	4.275	3.673	5.689	3.45
INUSUG	4.45	4.353	3.94	3.999	5.902	4.659	3.855	5.855	3.858	5.457	5.475	4.034	3.855
INUTAN	3.856	3.884	4.188	4.517	3.694	5.411	5.416	3.619	3.647	5.661	4.924	5.89	3.619
IRUQIY	4.667	4.598	3.865	3.96	4.267	6.193	5.159	5.913	5.244	4.245	3.957	5.433	3.865
ITAYUZ	4.199	3.97	4.199	3.97	5.763	3.961	5.486	3.882	5.763	3.961	3.882	5.486	3.882
ITAZAG	4.005	4.11	4.29	4.205	3.76	5.53	5.619	3.908	3.911	5.793	3.979	5.707	3.76
ITAZIO	4.282	3.896	4.258	3.98	3.977	5.8	5.437	3.79	3.969	5.753	5.479	3.79	3.79
ITOGOQ	3.959	4.117	4.073	3.959	5.462	3.76	3.783	4.02	3.998	5.537	4.216	3.987	3.76
IYAWIP	3.997	4.199	4.087	4.372	3.74	5.522	4.011	5.728	5.532	4.114	5.938	4.165	3.74
IYAWOV	4.255	3.906	4.26	3.766	5.707	4.397	3.757	4.001	5.765	3.834	4.243	3.768	3.757
IYOCIL	3.73	3.752	3.79	3.754	4.539	4.809	4.613	4.831	4.84	4.678	4.592	4.62	3.73
IYOCOR	4.253	4.154	4.297	4.205	4.431	4.839	4.65	4.935	5.495	4.413	4.856	4.984	4.154
IYOLAM	3.975	4.277	3.94	4.048	4.609	4.838	4.703	3.914	4.411	3.743	5.241	4.689	3.743
IYOLEQ	4.067	4.244	4.056	4.177	5.373	4.502	4.84	5.441	4.58	5.298	4.098	5.671	4.056
IYOLOA	4.085	4.079	4.46	4.053	4.685	5.308	4.525	5.319	5.938	4.312	5.422	4.406	4.053
IYOLUG	4.351	4.03	4.431	3.825	5.579	5.031	4.553	5.293	4.683	5.807	4.985	4.587	3.825
IYOMAN	4.442	4.398	3.859	3.738	4.3	5.951	4.271	5.894	4.995	4.535	4.469	4.818	3.738
IYOMER	4.155	4.067	4.206	4.236	4.895	5.048	4.72	4.55	4.874	5.392	4.585	5.501	4.067
IYOMIV	3.796	4.27	3.947	4.409	4.344	4.343	4.634	4.778	4.074	4.344	5.048	4.811	3.796
JANYIJ	4.242	4.081	4.124	3.998	4.344	5.72	4.031	5.606	5.605	4.213	3.794	5.517	3.794
JEZSUF	3.755	3.842	4.342	4.745	5.251	3.665	3.8	5.352	5.859	4.029	4.235	6.236	3.665
JEZTAM	4.028	4.322	4.028	4.322	4.081	5.485	5.832	4.189	4.081	5.485	4.189	5.832	4.028
JEZWOD	3.806	4.198	3.897	4.647	5.251	3.99	3.807	5.725	5.421	3.614	6.036	4	3.614
JOVNOZ	4.066	4.086	4.1	3.899	3.804	5.603	3.927	4.049	4.819	3.794	4.031	3.94	3.794
KAMCOT	4.423	3.953	4.424	3.935	5.256	5.556	4.489	5.061	4.65	5.694	4.893	4.914	3.935
KAQSON	4.196	3.801	4.572	4.067	5.502	4.788	3.963	5.237	4.18	6.08	3.715	5.598	3.715
KAQSUT	4.06	3.95	4.369	4.211	5.581	3.96	4.72	5.111	4.04	5.906	4.539	5.651	3.95
KAVBAN	3.637	3.466	4.716	4.978	4.4	4.703	4.404	4.372	6.051	5.14	5.467	6.303	3.466
KAYSOV	4.233	4.078	4.516	3.776	3.804	5.747	4.884	5.145	3.963	6.027	5.286	3.745	3.745
KAYSUB	4.389	3.853	4.339	3.951	4.062	5.914	3.668	5.374	5.863	3.948	3.963	5.454	3.668
KECVAS	3.782	3.73	4.104	4.14	4.468	4.377	4.358	4.368	4.146	4.414	4.91	4.36	3.73
KEHHOX	4.402	4.108	4.401	3.99	3.891	5.909	5.578	4.116	5.913	4.066	5.242	4.495	3.891
KEKKUJ	3.974	3.66	4.462	4.238	4.613	4.591	4.711	4.473	5.805	4.748	4.464	5.516	3.66
KEKLAQ	3.984	3.676	4.501	4.264	4.623	4.621	4.718	4.499	5.858	4.83	4.481	5.54	3.676
KEMVOP	4.392	3.756	4.509	4.027	5.832	4.542	5.082	3.891	4.02	6.019	3.626	5.55	3.626
KIKKAS	4.13	3.932	4.355	4.225	3.946	5.653	5.424	3.806	5.892	4.075	5.732	4.058	3.806
KIQYAM	3.971	4.168	4.306	4.091	3.766	5.496	3.861	5.678	4.023	5.816	5.609	3.648	3.648
KIQYEQ	4.226	4.624	3.919	3.882	4.289	5.684	4.702	6.108	3.597	5.424	5.324	4.043	3.597
KIQYIU	3.695	4.058	4.681	4.216	3.839	5.174	4.051	5.55	4.657	6.161	3.928	5.744	3.695
KIWNUB	4.057	4.183	4.057	4.183	4.263	5.524	3.715	5.687	4.263	5.524	5.687	3.715	3.715
KIWPAJ	4.046	3.822	4.31	4.475	4.176	5.519	3.717	5.358	4.002	5.811	5.983	4.379	3.717
KIWPEN	4.207	4.347	3.872	4.247	5.706	3.734	4.097	5.873	5.336	4.069	4.393	5.727	3.734
KIWPIR	4.2	4.087	4.246	3.99	5.633	4.676	5.607	3.811	4.313	5.747	3.794	5.49	3.794
KIWPOX	4.113	3.797	4.61	3.981	5.415	4.578	4.922	4.49	5.067	5.075	4.241	5.233	3.797
KIWPUD	4.713	3.864	4.985	3.733	6.02	5.349	4.899	4.657	6.304	5.565	4.573	4.748	3.733
KUWLUK	3.828	3.952	4.143	4.658	3.73	5.321	4.464	5.3	5.661	3.899	4.319	6.179	3.73
KUWMAR	4.682	3.991	4.275	3.672	4.395	6.208	3.662	5.51	5.774	4.271	3.575	5.163	3.575
LAJMUG	4.138	4.347	3.859	4.262	4.019	5.577	4.031	5.963	3.652	5.387	5.727	4.178	3.652
LAJNAN	3.818	3.906	4.457	4.303	4.383	5.132	5.067	4.496	3.945	5.957	4.017	5.82	3.818
LUJVUI	4.195	4.26	3.947	4.198	3.809	5.72	4.221	5.774	4.05	5.394	5.685	4.264	3.809
LUJWAP	3.672	3.889	4.07	3.985	4.006	3.935	3.685	3.976	3.615	4.965	4.878	4.114	3.615
LUJWET	3.936	3.778	3.857	4.031	3.779	5.452	3.927	3.387	4.024	3.581	5.518	4.048	3.387
LUKKUA	3.994	4.874	3.78	4.522	4.405	5.285	5.401	6.185	4.164	5.092	5.715	5.244	3.78
LUKLAH	4.73	4.56	3.81	3.703	4.446	6.239	6.081	4.14	4.296	5.114	4.874	4.443	3.703
LUVZIO	4.421	4.55	3.663	3.953	5.927	4.267	6.083	4.353	4.846	4.439	3.714	5.463	3.663
LUVZOU	4.416	4.533	3.722	3.931	5.924	4.325	6.05	4.322	4.934	4.449	3.75	5.436	3.722
LUVZUA	4.114	3.705	4.558	4.048	3.773	5.639	3.722	5.156	4.258	6.08	5.578	3.78	3.705
LUWBAJ	4.117	4.522	3.7	4.061	5.65	3.81	6.037	4.262	5.095	3.8	3.801	5.601	3.7
LUWBEN	3.982	4.47	3.875	4.352	4.823	3.857	4.822	3.857	4.452	4.987	4.549	4.797	3.857
MALYOP	3.925	4.625	3.839	4.37	5.476	3.774	4.306	6.161	3.748	5.316	4.422	5.821	3.748
MALYUV	3.901	4.408	3.901	4.408	3.866	5.402	4.103	5.904	3.866	5.402	5.904	4.103	3.866
MEQZAM	3.762	4.255	4.002	4.577	3.533	5.281	5.728	4.567	3.476	5.5	4.281	6.062	3.476
MOHXEO	3.836	4.065	4.007	4.513	3.688	5.326	5.592	3.764	3.645	5.534	6.03	4.333	3.645
MOHXOY	3.89	4.182	4.245	3.767	5.399	3.781	3.76	3.867	3.735	3.65	3.606	5.305	3.606
MUSWAA	4.216	4.225	4.356	4.095	5.733	3.972	5.173	5.176	5.786	4.486	4.95	5.082	3.972
NAMWUW	3.947	4.518	3.796	4.258	3.847	5.448	4.222	6.045	3.845	5.261	5.777	4.056	3.796
NAMXAD	4.22	3.868	4.446	3.984	4.12	5.728	4.119	5.23	4.294	5.958	5.469	3.955	3.868
NAZPAI	4.515	3.565	3.966	3.801	4.347	4.276	4.275	4.739	4.981	4.47	3.529	5.261	3.529
NETLOQ	4.377	4.492	3.894	3.878	5.879	3.849	5.95	4.673	5.383	3.806	3.942	5.337	3.806
NETLUW	3.849	4.474	4.017	4.621	5.041	4.575	5.893	4.814	5.245	4.686	5.126	5.993	3.849
NETMAD	4.308	4.42	4.13	3.882	5.598	4.898	5.667	5.054	5.424	4.619	4.348	5.191	3.882
NETMEH	3.766	4.327	4.138	4.655	4.832	4.496	5.772	4.442	5.325	4.826	5.125	6.004	3.766
NETMIL	3.761	4.448	3.761	4.448	5.207	3.79	5.9	4.543	5.207	3.79	4.543	5.9	3.761
NETMOR	4.478	3.772	4.478	3.772	5.935	4.614	5.242	3.799	5.935	4.614	3.799	5.242	3.772
NETMUX	3.983	4.025	3.926	3.965	5.303	4.211	5.505	3.672	5.445	3.603	3.722	5.451	3.603
NIHXAG	4.168	4.191	4.191	4.168	4.517	5.564	3.702	5.692	3.702	5.692	5.564	4.517	3.702
NIHYEL	4.349	4.194	4.113	4.048	4.872	4.809	4.732	4.879	4.409	4.243	4.109	4.311	4.048
NIHZOV	4.157	4.077	4.263	4.129	3.769	5.68	3.826	5.583	3.738	5.778	5.6	4.168	3.738
NIJBIT	4.356	3.873	4.315	3.962	4.326	5.858	5.398	3.688	5.834	3.909	5.469	3.748	3.688
NIWROD	4.238	3.748	4.555	3.925	3.823	5.74	3.825	5.182	4.039	6.056	3.838	5.461	3.748
NIWSAQ	3.94	4.645	3.787	4.313	3.735	5.473	6.109	4.122	5.273	3.708	4.13	5.808	3.708
NOSNEQ	4.231	4.563	3.558	4.256	5.762	3.87	4.614	6.041	4.729	4.249	4.052	5.772	3.558
NOSNIU	4.251	4.431	3.913	4.128	3.949	5.775	5.953	4.117	5.066	4.683	4.078	5.637	3.913
NOSNOA	3.761	3.83	3.671	3.869	4.967	3.662	5.337	3.618	5.195	3.482	4.044	5.269	3.482
NOSNUG	3.991	4.014	4.107	4	5.485	3.992	5.53	3.803	5.634	3.71	3.778	5.522	3.71
NURYUX	3.698	3.781	3.769	3.74	5.062	3.875	5.295	3.629	5.242	3.586	3.761	5.004	3.586
NURZAE	4.086	3.888	4.224	4.333	3.497	3.759	3.746	3.672	4.229	5.617	4.005	5.861	3.497
NUSCAI	4.447	4.576	3.775	3.802	5.844	4.874	6.104	4.19	4.965	4.258	4.076	5.254	3.775
OJOHIH	4.485	3.594	3.633	3.608	3.823	4.791	3.841	3.655	3.738	4.875	3.808	3.685	3.594
OROXOL	3.76	3.697	4.403	4.749	4.924	4.432	5.196	3.591	5.887	4.034	4.605	6.257	3.591
OROXUR	4.202	4.509	4.141	4.044	4.248	5.632	4.025	6.014	3.733	5.673	5.573	3.797	3.733
OSEJUS	4.44	4.481	3.989	4.042	4.566	5.923	5.1	5.777	4.5	5.321	5.515	4.138	3.989
OSEKAZ	4.29	3.776	4.533	4.194	4.05	5.812	4.567	4.885	4.35	6.049	5.306	5.013	3.776
OVAQAG	4.187	3.988	4.089	4.284	3.557	5.671	5.495	3.896	4.183	5.57	3.673	5.787	3.557
OXAWAO	4.281	4.282	4.192	3.831	4.212	5.791	4.556	4.957	4.684	4.945	4.503	4.963	3.831
OXUFAP	3.27	3.298	3.294	3.249	3.74	4.513	4.628	3.823	4.427	3.888	4.499	3.776	3.249
PEMXIP	4.02	3.958	4.048	3.926	3.775	5.541	3.665	3.828	4.502	4.075	4.065	3.846	3.665
PEMXOV	4.205	4.254	4.016	3.995	4.216	5.733	4.043	5.794	3.908	5.486	5.499	3.815	3.815
PEPKOM	4.25	4.398	4.136	3.922	3.997	5.794	3.861	5.927	4.12	5.634	3.96	5.424	3.861
PEPKUS	4.082	3.816	4.239	4.271	5.599	3.838	3.881	5.108	3.951	5.766	5.763	4.16	3.816
PIPKIL	4.598	4.48	3.785	3.888	4.154	6.109	5.996	4.038	5.298	3.683	4.425	5.194	3.683
PITCED	4.01	4.366	3.686	4.114	3.586	5.355	3.986	5.883	3.784	3.92	3.675	5.597	3.586
PITCIH	4.215	4.245	4.049	4.102	4.27	5.663	4.525	5.685	5.513	4.21	3.837	5.622	3.837
PITCUT	3.895	3.991	4.109	4.027	3.661	4.552	5.501	3.636	5.623	3.83	3.726	4.229	3.636
PITDAA	4.254	4.103	3.889	3.915	3.673	5.741	3.675	4.759	5.128	3.815	3.646	4.144	3.646
PITDEE	4.046	4.014	4.037	3.896	3.706	3.603	3.576	4.408	4.23	3.845	3.723	3.94	3.576
POFXAL	4.181	4.157	3.898	3.981	3.695	3.704	4.349	3.773	3.79	3.819	3.816	4.394	3.695
POGCEV	4.381	3.971	4.381	3.971	4.243	5.889	4.543	5.24	4.243	5.889	5.24	4.543	3.971
POGYIV	4.101	4.417	3.825	4.215	4.676	5.391	4.108	5.949	4.474	5.09	5.36	5.038	3.825
POKNEK	3.512	4.71	4.185	5.05	3.887	4.849	5.17	6.084	4.876	5.433	6.391	5.583	3.512
POKNIO	4.048	3.895	4.842	4.398	5.566	3.837	5.148	4.486	4.28	6.318	5.911	3.908	3.837
POKNOU	4.008	3.899	4.849	4.434	3.827	5.519	5.171	4.465	4.308	6.33	3.927	5.943	3.827
POKNUA	3.486	4.884	3.671	4.864	4.739	4.048	6.413	4.435	5.057	4.071	6.18	5.506	3.486
POKPAI	4.137	3.713	4.561	4.081	5.668	3.871	4.983	4.297	4.021	6.042	5.574	3.806	3.713
POKPEM	4.421	4.214	4.03	3.838	4.879	5.784	3.788	5.697	5.541	3.631	5.284	3.934	3.631
PUBRAI	4.077	3.762	3.85	4.142	5.571	3.55	3.693	5.289	3.679	5.377	4.155	4.227	3.55
PUBREM	4.285	4.157	4.23	3.758	4.287	5.799	3.578	5.67	4.135	5.746	5.265	3.759	3.578
PUQWEF	3.781	3.823	3.973	4.093	4.442	3.718	4.372	3.747	3.846	4.825	3.759	3.897	3.718
PUQWIJ	3.595	4.025	4.228	4.175	5.037	3.665	3.797	5.457	5.743	3.681	4.519	5.584	3.595
PUTZEM	4.134	4.312	3.98	3.905	5.629	3.6	3.82	5.826	3.822	5.484	5.395	4.006	3.6
QACVAV	4.135	4.144	4.135	4.144	5.638	3.994	5.642	4.028	5.638	3.994	4.028	5.642	3.994
QAXKAC	4.374	4.004	4.374	4.004	4.82	5.737	4.521	5.275	4.82	5.737	5.275	4.521	4.004
QEGTII	3.818	4.166	4.409	4.467	4.576	4.988	5.606	4.421	5.175	5.627	5.911	3.834	3.818
QENLON	4.185	4.069	4.198	4.129	5.343	4.808	5.384	4.474	5.689	4.146	4.668	5.362	4.069
QENMOO	3.944	3.939	3.971	4.035	5.159	3.716	5.227	3.773	5.295	4.084	3.766	5.442	3.716
QENMUU	3.899	3.66	4.578	4.322	5.122	4.414	4.673	4.504	5.894	4.983	5.794	4.256	3.66
QICVUU	4.121	4.181	4.12	4.13	3.824	4.16	4.124	3.893	4.013	4.038	4.046	5.646	3.824
QICWAB	4.195	4.466	3.928	4.05	3.905	5.716	4.451	5.966	3.818	5.448	5.566	3.857	3.818
QICWEF	4.284	4.467	3.855	3.905	3.908	5.802	3.927	5.966	3.884	5.32	5.384	3.865	3.855
QICWIJ	3.94	4.385	3.917	4.245	5.41	3.92	5.912	3.984	5.391	3.933	4.021	5.767	3.917
QIFXOU	3.956	3.913	3.927	4.007	4.089	5.45	4.282	3.925	3.701	5.412	3.771	5.556	3.701
QIFZIQ	3.934	4.432	3.934	4.432	3.609	5.465	3.972	5.935	3.609	5.465	5.935	3.972	3.609
QIFZOW	4.282	3.778	4.693	4.049	5.795	3.898	5.292	3.552	5.887	4.05	3.832	5.568	3.552
QIFZUC	4.122	4.122	4.122	4.122	5.631	4.007	5.631	4.007	5.631	4.007	4.007	5.631	4.007
QIGBAL	4.175	4.372	4	4.174	3.781	5.328	4.401	4.196	4.967	4.829	5.37	3.88	3.781
QIGBEP	4.006	4.355	4.006	4.355	3.763	5.509	4.019	5.878	3.763	5.509	5.878	4.019	3.763
QIGBIT	4.09	4.016	4.132	3.655	5.611	3.672	5.192	4.806	5.672	3.865	4.412	4.829	3.655
QIGBOZ	3.605	3.918	3.551	4.635	3.762	3.889	5.322	3.668	4.7	4.334	5.188	5.291	3.551
QIGBUF	4.316	3.943	4.324	4.176	4.505	5.783	4.751	5.108	3.786	5.811	5.702	4.063	3.786
QIGCAM	4.266	4.154	4.377	3.972	3.752	5.772	5.679	3.979	5.89	4.39	4.754	5.168	3.752
QOMDIH	4.769	3.997	4.207	3.584	4.298	6.273	5.519	3.657	5.731	3.971	4.742	4.322	3.584
QUBZIX	4.18	4.228	4.174	3.961	3.847	5.74	5.755	3.857	4.116	5.665	3.827	5.495	3.827
RADJAL	4.037	4.32	3.837	3.904	4.33	4.995	3.811	4.087	5.016	3.966	4.853	3.879	3.811
RAKDUE	4.234	4.168	3.931	4.357	5.75	4.13	5.673	3.967	5.454	3.774	4.008	5.893	3.774
RENYOB	3.887	4.049	4.373	4.344	5.09	4.579	4.376	4.431	5.847	4.205	4.673	5.792	3.887
RESGAZ	4.684	4.735	3.802	3.78	4.091	6.069	4.955	6.189	4.646	4.89	5.05	4.227	3.78
RESZEW	4.503	4.214	4.118	3.713	4.35	6.007	5.731	4.049	5.585	4.079	5.162	3.587	3.587
ROQPOE	4.436	4.105	4.383	4.022	3.82	5.892	4.983	5.181	3.823	5.881	5.099	4.932	3.82
RUMKAN	4.211	4.383	3.931	4.134	3.977	5.741	4.138	5.907	5.377	4.009	5.671	3.901	3.901
RUMKER	4.173	4.288	4.22	4.062	5.69	3.959	5.71	4.265	5.502	4.856	4.154	5.486	3.959
RUMKIV	4.169	4.192	4.198	4.204	5.729	3.776	5.718	4.255	5.678	3.767	4.155	5.699	3.767
RUMKOB	4.211	4.363	4.109	3.992	4.247	5.703	4.531	5.833	3.948	5.623	5.502	3.843	3.843
RUMKUH	3.766	4.3	3.897	4.126	4.99	4.373	5.803	4.219	5.186	3.79	4.151	5.357	3.766
SEQRAI	4.446	4.251	4.004	3.761	4.185	5.955	3.961	5.786	3.825	5.509	5.193	3.825	3.761
SEQREM	4.021	4.06	3.997	3.948	3.952	5.523	3.99	5.572	3.695	5.502	5.492	3.558	3.558
SESNOV	3.95	4.537	3.97	4.474	5.455	3.924	6.047	4.403	5.432	4.105	4.66	5.945	3.924
SESNUB	3.978	3.936	4.474	4.438	3.724	5.514	5.457	3.552	5.676	5.136	5.501	5.369	3.552
SESPAJ	3.925	4.161	4.072	4.585	3.702	5.439	3.645	5.668	4.835	5.216	5.764	5.291	3.645
SETJEJ	3.856	4.375	3.856	4.375	3.665	5.372	4.078	5.898	3.665	5.372	5.898	4.078	3.665
SETKOS	4.074	3.764	4.637	3.996	5.601	3.767	5.136	3.938	6.15	4.392	3.669	5.517	3.669
SIJJIH	4.368	3.984	4.305	4.356	4.525	5.839	4.077	5.469	5.815	4.309	4.086	5.879	3.984
SILZOE	4.204	4.401	4.119	3.992	5.706	4.199	5.872	4.597	5.631	3.91	3.772	5.505	3.772
SINQAK	4.447	3.886	4.241	4.124	3.954	5.954	3.726	5.401	4.094	5.766	5.648	3.939	3.726
SOQZUV	3.781	4.335	4.023	4.49	3.689	5.289	3.884	5.862	3.936	5.525	4.085	6.006	3.689
SORNOE	4.403	4.195	4.181	3.924	5.658	5.1	5.714	3.694	5.693	3.891	5.398	3.981	3.694
SORNUK	4.211	3.83	4.543	4.128	4.406	5.67	5.342	3.608	5.975	4.87	3.808	5.653	3.608
SORPAS	3.979	4.288	3.967	4.487	5.508	3.819	3.931	5.803	4.606	5.22	4.585	5.969	3.819
SORPEW	4.136	4.464	3.969	4.424	3.791	5.657	5.965	4.286	3.924	5.45	4.314	5.937	3.791
SORPIA	3.72	4.197	4.243	4.658	5.071	4.122	3.734	5.716	3.799	5.776	4.549	6.148	3.72
SORPOG	4.148	4.295	4.151	4.37	5.665	3.761	5.602	4.695	3.85	5.67	4.508	5.843	3.761
SORPUM	3.986	4.241	3.986	4.241	5.491	3.908	5.764	3.847	5.491	3.908	3.847	5.764	3.847
SUGPES	4.601	3.875	4.379	3.698	6.087	4.677	3.673	5.39	3.98	5.892	5.193	3.604	3.604
TAJQIH	4.309	4.242	3.835	3.886	5.815	4.118	5.762	4.037	5.354	3.732	4.35	5.226	3.732
TATTIT	3.689	4.32	4.111	4.48	5.129	3.842	5.854	3.963	3.957	5.601	5.978	4.092	3.689
TAVRUF	4.556	3.734	4.556	3.734	6.001	4.675	3.748	5.194	6.001	4.675	5.194	3.748	3.734
TAXGUX	4.12	4.556	3.924	4.116	3.78	5.639	4.689	6.033	5.2	4.561	3.854	5.642	3.78
TOQRUO	4.061	3.853	4.541	4.088	3.747	5.583	3.745	5.363	4.531	6.052	5.631	3.73	3.73
TOQSAV	4.199	4.371	3.891	4.026	5.727	3.878	5.881	3.879	5.26	4.229	3.657	5.557	3.657
TOQSEZ	4.171	3.882	4.314	4.148	5.686	4.066	5.404	3.654	5.839	3.892	3.904	5.677	3.654
TOQSOJ	3.762	3.64	4.095	4.159	3.878	5.239	4.017	4.807	4.005	5.613	5.661	3.746	3.64
TOQSUP	4.372	4.222	3.966	4.021	4.602	5.833	3.998	5.728	3.626	5.498	5.546	4.038	3.626
TOVPIG	4.066	3.942	4.473	4.65	5.609	3.78	5.48	3.661	4	5.91	4.832	6.129	3.661
TOVPOM	4.206	4.465	3.89	4.182	5.718	4.048	4.186	5.965	4.558	5.099	5.452	4.785	3.89
UFAVUV	4.193	4.07	4.233	3.943	5.727	3.975	5.588	4.023	4.029	5.769	5.5	3.718	3.718
UFOROX	3.95	4.022	3.966	3.964	5.467	3.709	3.777	4.125	5.496	3.65	3.945	4.203	3.65
UFORUD	3.91	4.165	3.905	4.081	3.808	5.434	3.708	4.075	3.608	3.889	5.589	3.827	3.608
UJOVEV	3.586	3.694	4.103	4.139	4.849	3.847	5.186	3.6	5.612	3.894	4.122	5.508	3.586
UJOVIZ	3.68	4.225	3.988	4.299	3.445	4.991	3.753	4.808	5.197	3.946	4.711	4.295	3.445
UJOVOF	4.132	4.007	4.307	4.241	5.647	3.909	3.958	5.511	4.089	5.817	3.913	5.774	3.909
ULEWAM	4.06	3.907	4.198	4.433	4.162	4.652	4.763	4.954	3.865	5.714	4.834	4.068	3.865
ULEWEQ	4.148	4.225	3.941	4.14	3.678	5.663	5.694	4.388	5.465	3.757	5.658	3.704	3.678
ULEWIU	4.272	4.286	4.248	4.178	5.609	4.818	5.671	4.73	4.829	5.553	5.51	4.749	4.178
ULEWUG	4.45	4.314	4.346	3.925	5.845	4.862	4.713	5.688	4.314	5.848	4.722	5.1	3.925
UWIMUK	4.216	4.265	4.425	4.335	5.502	3.624	5.713	4.402	4.556	5.862	5.8	3.8	3.624
UYUSIS	3.707	4.498	3.707	4.498	4.819	4.401	5.996	4.401	4.819	4.401	4.401	5.996	3.707
VAFLOF	4.179	4.115	4.179	4.115	3.836	5.711	5.649	3.85	3.836	5.711	3.85	5.649	3.836
VAFLUL	4.136	4.149	4.136	4.149	5.655	3.896	5.669	3.885	5.655	3.896	3.885	5.669	3.885
VAFMAS	4.077	4.091	4.077	4.091	3.88	5.6	3.87	5.616	3.88	5.6	5.616	3.87	3.87
VEVSAS	4.224	4.108	4.224	4.108	3.941	5.727	5.633	3.971	3.941	5.727	3.971	5.633	3.941
VUCKIP	4.045	3.781	4.108	4.14	5.392	4.355	5.295	3.459	5.619	3.91	3.67	5.651	3.459
VUPYOW	3.828	4.049	3.99	3.823	4.582	4.408	4.827	4.531	4.452	4.769	4.984	4.515	3.823
VUPYUC	4.04	4.047	4.02	4.111	5.363	4.393	4.8	5.089	5.193	4.644	3.986	5.601	3.986
VUQBIU	4.19	4.113	4.19	4.113	3.816	5.718	5.646	3.865	3.816	5.718	3.865	5.646	3.816
WAPKAC	3.938	3.961	4.175	4.131	3.816	3.791	5.489	3.733	3.95	5.694	5.665	3.946	3.733
WAPKEG	4.339	4.016	3.891	3.955	5.861	4.012	5.541	3.726	3.742	4.021	5.485	3.647	3.647
WAXMOA	3.91	3.874	4.696	4.641	4.634	5.051	5.056	4.583	6.223	4.662	4.301	6.197	3.874
WICCET	4.15	4.071	4.184	3.835	3.768	5.664	5.541	4.061	5.694	3.772	5.349	3.784	3.768
WISJEQ	4.262	4.157	4.143	4.18	4.034	5.779	3.827	5.68	3.818	5.659	5.689	3.906	3.818
WOCWUI	4.137	3.88	4.283	4.087	4.049	5.659	5.098	4.505	4.156	5.807	4.867	5.154	3.88
WOCYET	3.928	4.554	3.834	4.368	5.461	3.61	4.329	6.054	4.035	5.217	4.418	5.862	3.61
WOCYIX	4.015	4.095	4.204	4.306	5.52	3.834	5.388	4.679	4.17	5.699	5.726	4.644	3.834
WUDXAX	3.992	4.416	3.945	4.003	4.481	5.284	5.762	4.786	5.446	3.763	5.216	4.594	3.763
WUDXEB	4.322	4.373	4.164	3.989	4.754	5.657	5.707	4.746	5.317	4.912	4.885	5.048	3.989
WUDYAY	3.934	4.29	3.744	4.329	3.964	5.389	5.581	4.759	4.336	4.952	4.695	5.695	3.744
WUTBOF	4.591	3.58	4.51	3.681	4.275	6.08	3.681	4.662	4.182	5.919	4.771	3.619	3.58
WUTBUL	4.187	3.96	4.506	4.198	4.023	5.697	4.86	4.994	4.016	6.02	5.191	5.192	3.96
WUTCAS	4.149	4.134	3.92	3.948	4.872	5.329	4.799	5.341	4.743	5.058	5.069	4.787	3.92
WUTCEW	4.353	4.072	4.302	3.887	5.464	5.174	5.594	3.723	4.568	5.674	5.107	4.438	3.723
WUTCIA	4.526	4.233	4.179	3.633	6.04	4.037	5.723	3.936	5.684	3.626	3.795	5.069	3.626
WUWPUB	4.992	4.001	4.191	3.556	5.571	6.308	5.495	3.924	4.249	5.696	3.956	4.822	3.556
WUWQAI	4.002	4.046	3.887	4.14	5.49	3.69	3.664	3.89	4.666	3.615	4.092	3.725	3.615
WUWQEM	3.834	4.452	3.678	4.429	3.724	5.338	3.827	5.918	3.319	3.518	5.799	4.055	3.319
XATTAQ	4.629	4.476	4.053	3.731	5.956	5.194	5.989	4.409	5.135	4.867	4.307	5	3.731
XAXQET	4.058	4.623	3.825	4.105	5.568	3.702	6.125	4.244	5.052	4.358	3.76	5.63	3.702
XAXQIX	4.252	4.169	4.104	4.049	3.959	5.748	5.722	4.044	4.215	5.637	5.586	3.862	3.862
XAXQOD	4.064	4.621	3.932	3.932	3.88	5.571	4.499	6.123	4.568	5.158	5.415	3.902	3.88
XEJZOE	4.538	3.875	4.414	3.816	6.049	4.208	5.082	4.471	5.807	4.762	4.609	4.728	3.816
XEJZUK	4.373	4.279	4.119	4.261	4.995	5.65	5.752	4.47	5.499	4.515	4.322	5.73	4.119
XENNIO	4.028	4.347	3.965	4.324	4.019	5.516	4.391	5.836	4.052	5.439	5.841	3.863	3.863
XESVEY	4.656	4.508	3.881	3.975	6.106	4.861	6.009	4.067	5.011	4.653	4.958	4.91	3.881
XIJXUK	4.206	4.172	3.916	4.126	3.914	5.7	5.688	3.894	3.75	5.42	5.63	3.554	3.554
XIKZIC	4.093	4.164	4.088	4.116	5.281	4.708	5.67	4.027	4.443	5.415	5.176	4.889	4.027
XIQGEK	3.776	4.727	3.757	4.623	4.195	5.103	6.167	5.038	4.228	5.073	6.156	4.255	3.757
XIWFAN	3.714	4.684	3.625	4.666	5.117	4.013	6.199	4.26	4.876	4.137	6.18	4.287	3.625
XODQOZ	3.804	4.382	3.678	4.023	3.627	3.969	3.857	4.09	4.139	3.561	3.797	4.264	3.561
XODQUF	3.697	3.692	4.007	4.184	3.811	3.572	3.514	4.027	4.086	3.8	4.068	3.973	3.514
XODRAM	3.864	4.324	3.674	4.037	3.686	3.96	3.799	4.1	4.178	3.561	3.794	4.153	3.561
XODREQ	4.108	4.398	3.669	3.85	3.943	4.219	4.086	4.169	3.575	3.817	3.684	3.826	3.575
XODRIU	4.111	3.844	3.877	4.26	3.808	5.627	3.351	5.354	3.987	5.384	5.779	4.001	3.351
XODROA	3.818	4.375	3.679	4.022	3.633	3.966	3.843	4.097	4.144	3.551	3.791	4.241	3.551
XODRUG	3.768	4.446	3.696	4.007	3.595	4.004	3.93	4.08	4.097	3.577	3.813	4.331	3.577
XODSAN	3.802	4.403	3.683	4.012	3.613	3.994	3.871	5.907	3.549	5.19	3.788	4.277	3.549
XODSER	3.624	4.124	4.214	4.53	3.801	5.065	3.705	5.643	3.936	5.738	6.031	4.055	3.624
XODSIV	4.277	3.787	4.573	3.818	3.746	5.778	3.726	5.301	6.09	4.255	3.656	5.328	3.656
XODSOB	3.865	4.321	3.671	4.033	3.69	3.967	3.8	4.108	4.174	3.56	3.791	4.136	3.56
XODSUH	4.028	4.295	3.667	3.884	3.795	5.51	3.778	5.806	3.556	5.177	5.42	3.711	3.556
XODTAO	3.885	3.835	4.247	4.401	3.61	5.404	3.64	5.362	3.83	5.764	5.901	3.813	3.61
XODTES	3.796	3.812	4.062	4.019	3.62	5.315	3.682	3.89	3.661	5.584	5.534	3.821	3.62
XODTIW	4.375	3.839	4.301	3.786	3.936	5.883	3.765	5.368	4.156	5.836	5.315	3.513	3.513
XODTUI	3.733	3.757	3.766	3.676	3.498	5.274	3.558	5.268	3.727	5.199	5.182	3.658	3.498
XODVAQ	3.74	4.005	4.293	4.249	3.528	5.276	3.732	5.459	3.761	5.819	5.75	3.813	3.528
XODVEU	4.018	3.938	4.193	3.321	3.683	5.532	3.833	5.457	3.728	5.708	4.7	3.518	3.321
XODVIY	3.681	4.053	4.028	4.495	4.466	4.234	3.913	4.064	3.861	3.739	4.91	4.923	3.681
XODVOE	4.327	3.785	4.443	4.154	5.836	3.792	4.931	4.516	5.861	4.766	5.66	4.091	3.785
XODVUK	4.368	3.956	4.22	3.718	5.82	3.737	3.642	3.768	5.015	3.9	3.426	5.245	3.426
XOHFOQ	3.858	4.371	3.858	4.371	3.676	5.364	4.206	5.881	3.676	5.364	5.881	4.206	3.676
XUPVUA	4	4.856	3.759	3.93	3.874	5.523	6.364	4.716	4.712	4.664	3.726	5.461	3.726
YIZBUG	3.961	3.606	4.332	3.998	3.88	5.484	3.579	3.668	3.837	4.116	3.744	3.806	3.579
YOQMID	3.853	3.68	3.642	4.475	3.483	3.738	3.848	5.158	3.74	5.103	5.118	4.282	3.483
YOQSAB	4.38	4.069	4.632	4.274	5.867	4.525	5.387	4.597	6.032	3.956	5.694	4.687	3.956
YOQTUW	3.708	4.506	3.897	3.629	3.922	5.17	5.968	4.283	3.523	4.81	4.231	4.41	3.523
YOQWAF	4.147	4.079	4.147	4.079	3.86	5.672	5.61	3.785	3.86	5.672	3.785	5.61	3.785
YOQWOT	4.219	3.808	4.585	4.17	3.892	4.421	3.514	3.795	4.023	4.018	4.671	4.349	3.514
YOQWUZ	4.236	4.448	3.735	4.072	5.734	3.67	5.953	3.922	3.719	5.18	5.579	3.974	3.67
YOQXAG	3.556	4.41	4.337	4.425	4.184	4.828	5.745	4.991	4.971	5.624	5.783	4.942	3.556
YOQXEK	4.309	3.93	4.473	4.179	3.942	5.84	3.869	5.444	3.977	5.964	3.847	5.708	3.847
YOZXAP	4.22	4.029	4.115	3.824	5.734	4.146	4.099	3.747	3.878	5.634	3.577	3.862	3.577
YUCYON	4.314	4.126	4.333	3.898	3.914	5.838	4.042	5.633	5.828	4.352	5.327	4.077	3.898
YUDZEF	3.685	4.571	3.685	4.571	3.729	5.156	6.084	4.135	3.729	5.156	4.135	6.084	3.685
YUFBAF	3.792	4.614	3.75	4.415	3.744	5.265	4.31	6.121	5.274	3.67	4.712	5.815	3.67
YUFBEJ	3.943	4.337	4.451	4.076	5.461	3.865	4.117	5.854	5.981	4.003	5.599	3.75	3.75
YUFBIN	4.084	4.216	4.084	4.216	5.52	4.303	3.615	5.7	5.52	4.303	5.7	3.615	3.615
YUGHIU	4.13	3.93	4.191	4.506	4.97	5.264	5.45	3.65	4.016	5.706	6.027	4.215	3.65

## Sheet: 2,6-Me2_net
Entry	DIST1	DIST2	DIST3	DIST4	min		Min
AGUXIM	3.623	4.438	3.506	4.377	3.506
AGUXOS	3.622	3.979	3.449	3.931	3.449		Mean	3.76504
AKOROK	4.345	3.844	4.463	3.988	3.844		Standard Error
AMOJET	3.83	4.676	3.83	4.676	3.83		Median	3.755
AMOJIX	3.819	3.78	4.486	4.643	3.78		Mode	3.766
BABNOL	4.126	4.392	3.878	4.217	3.878		Standard Deviation	0.196935
BAGDIA	4.295	4.03	4.371	3.797	3.797		Sample Variance	0.0387835
BOLHES	4.37	3.893	4.37	3.893	3.893		Kurtosis	-0.259065
BOLJEU	3.72	4.35	3.824	4.693	3.72		Skewness	0.151046
CADNII	3.677	4.28	4.082	4.701	3.677		Range	0.906
CILJAJ	4.633	3.73	4.528	3.703	3.703		Minimum	3.253
CILJEN	3.73	4.484	3.837	4.54	3.73		Maximum	4.159
CIMBOS	3.892	4.558	3.425	4.301	3.425		Sum	414.154
CISBAI	3.953	3.909	3.641	3.873	3.641		Count	110
CISBEM	3.766	4.096	4.089	3.904	3.766
CISBIQ	3.756	4.365	3.756	4.365	3.756
CISBOW	4.297	3.827	4.297	3.827	3.827
DOZWOH	3.927	3.99	4.495	4.015	3.927
EVUGUA	3.787	3.708	3.899	3.709	3.708
EWEGUK	4.697	4.693	3.585	3.527	3.527
EWEHIZ	4.21	4.135	4.21	4.135	4.135
EWOQEO	4.338	4.243	4.062	4.099	4.062
EWOQIS	4.109	3.714	4.474	4.341	3.714
FIJFIQ	4.458	3.866	4.291	3.609	3.609
FOCTUQ	4.198	3.751	3.979	4.173	3.751
FOCVAY	3.808	3.466	4.39	3.735	3.466
FUTKUB	3.895	4.057	4.193	4.236	3.895
GEFBUS	4.252	4.087	4.252	4.087	4.087
GOQSUC	4.202	4.001	4.381	4.184	4.001
GUKBIB	3.545	3.59	4.687	4.63	3.545
HEPSUR	3.529	3.584	3.549	4.651	3.529
HOBNOD	4.739	4.319	3.942	3.769	3.769
HOBNUJ	4.309	4.467	3.738	4.126	3.738
HOBPEV	4.435	3.663	4.357	3.683	3.663
HOBPEV01	4.403	3.887	4.229	4.021	3.887
JUVMOF	4.097	4.127	4.097	4.127	4.097
KAQVOQ	4.194	4.094	4.145	4.288	4.094
KEHQAQ	4.344	4.489	4.133	4.241	4.133
KIQYOA	4.117	4.292	4.133	4.276	4.117
KUFGUO	4.513	3.881	4.208	4.082	3.881
KUMJOU	3.927	4.652	3.8	4.399	3.8
KUMJUA	3.964	3.923	3.766	4.418	3.766
MAGYOK	4.092	4.503	3.864	3.924	3.864
MOXSEA	3.822	3.665	3.922	3.998	3.665
NIHZIP	3.955	3.924	3.928	3.856	3.856
NIHZUB	4.366	3.755	3.967	4.279	3.755
NIJBAL	4.727	4.014	4.132	3.737	3.737
NIXLIQ	4.155	4.134	4.155	4.134	4.134
NONVIW	4.298	4.642	3.944	4.009	3.944
NUYVIQ	4.09	4.272	4.094	4.003	4.003
NUYVOW	4.185	4.128	4.143	3.911	3.911
NUZCOE	3.84	4.353	4.041	4.175	3.84
OJOFID	4.301	4.052	4.301	4.052	4.052
ORUMIZ	4.731	4.654	3.54	3.52	3.52
ORUMOF	4.657	4.936	3.479	3.527	3.479
PAPDOA	4.113	4.541	3.621	4.186	3.621
PEMXUB	3.989	4.593	3.694	4.39	3.694
QEGDOX	3.598	4.488	3.873	4.574	3.598
QICWOP	4.605	4.441	3.955	3.701	3.701
QIFZIQ	3.94	4.489	3.94	4.489	3.94
QIFZOW	4.704	3.712	4.378	3.704	3.704
QIRNAK	4.013	3.493	3.632	3.952	3.493
QIRNIS	3.981	3.595	4.545	4.229	3.595
QOMDED	3.69	3.906	4.327	4.513	3.69
QOMDON	3.767	4.031	3.962	4.115	3.767
QOMDUT	3.83	4.022	4.091	4.387	3.83
REBLUH	4.293	4.188	4.052	3.976	3.976
RENYER	3.824	3.775	3.908	3.949	3.775
RESFEC	4.172	4.127	4.164	4.418	4.127
REVHIK	4.515	3.769	4.328	3.67	3.67
RIYQID	3.925	5.041	3.253	4.216	3.253
RIYSOL	4.08	3.425	4.841	4.116	3.425
RONWIE	3.903	4.024	4.198	4.285	3.903
RUJWEB	4.281	4.684	3.771	3.906	3.771
RUMJEQ	3.784	4.201	4.008	3.901	3.784
RUMJIU	3.996	3.699	4.855	4.046	3.699
RUMJOA	4.159	4.159	4.159	4.159	4.159
RUMJUG	4.048	4.758	3.745	4.017	3.745
RUMWON	3.968	4.073	3.598	4.07	3.598
RUMWON01	3.909	4.265	3.893	4.372	3.893
RUMWUT	4.129	3.91	4.256	3.71	3.71
RUMXAA	3.599	3.898	3.955	3.811	3.599
RUZKEG	3.986	4.309	4.091	4.321	3.986
SARFAU	3.885	3.578	4.301	4.395	3.578
SEQRIQ	4.344	3.92	4.466	3.866	3.866
SILZUK	3.908	3.995	3.981	4.674	3.908
TAQQEK	4.245	4.523	3.656	3.726	3.656
TATTEP	3.816	3.931	4.137	4.291	3.816
TOCKOO	4.649	4.494	3.599	3.622	3.599
TOCLAB	3.959	3.839	4.129	3.827	3.827
UBECOX	4.059	4.446	3.667	3.541	3.541
UTOCIQ	3.988	4.324	3.701	4.423	3.701
VAFNAT	4.753	4.104	4.045	3.528	3.528
VUGFEL	3.884	3.771	3.846	3.719	3.719
VUGFIP	3.789	4.03	4.008	3.679	3.679
VUGFOV	4.033	3.755	3.808	4.08	3.755
WOBSIT	3.906	3.777	3.986	3.979	3.777
WOBSOZ	4.227	4.677	3.709	3.999	3.709
XABPUN	4.157	4.144	4.157	4.144	4.144
XABPUN01	4.15	4.152	4.15	4.152	4.15
XATTEU	3.77	3.607	3.944	3.989	3.607
XATTIY	3.408	4.801	3.635	4.822	3.408
XIJXEU	4.604	3.401	4.605	4.09	3.401
YUDZIJ	4.138	4.212	4.138	4.212	4.138
YUDZOP	3.63	3.785	4.385	3.701	3.63
YUDZOP01	4.57	3.761	4.57	3.761	3.761
YUFBOT	3.459	3.597	4.913	4.684	3.459
YUTTAL	3.766	3.874	4.521	4.537	3.766
ZETYIK	4.637	4.111	4.118	3.747	3.747
ZETYUW	3.695	4.098	4.238	4.421	3.695

## Sheet: Cy_Ad_net
Refcode	DIST13	DIST14	DIST15	DIST16	DIST17	DIST18	min		Min
CISBUC	3.222	3.444	3.222	3.444	3.222	3.222	3.222
CISCAJ	3.256	3.428	3.256	3.432	3.041	3.015	3.015		Mean	3.2805
PAPDEQ	4.324	3.263	4.065	3.439	4.606	4.23	3.263		Standard Error
QIFZUC	4.385	3.35	4.385	3.35	4.385	4.385	3.35		Median	3.251
RESGIH	4.555	3.36	4.199	3.317	3.973	4.649	3.317		Mode	N/A
TUKGUC	4.167	3.254	4.097	3.18	3.791	3.8	3.18		Standard Deviation	0.187444
VAFMEW	3.176	3.346	3.176	3.314	3.327	3.232	3.176		Sample Variance	0.0351353
VAFMIA	3.35	3.387	3.35	3.355	3.283	3.283	3.283		Kurtosis	2.20162
VAFMOG	3.063	3.445	3.063	3.412	3.121	3.121	3.063		Skewness	1.40901
VAFNEX	4.088	3.249	4.464	3.239	4.564	4.173	3.239		Range	0.697
VAFNIB	4.043	3.293	3.717	3.348	3.816	3.957	3.293		Minimum	3.015
XATTUK	4.186	3.277	4.398	3.468	4.311	4.617	3.277		Maximum	3.712
YUHREB	4.366	3.197	4.074	3.177	3.865	4.454	3.177		Sum	52.488
YUHRIF	3.334	3.305	3.221	3.364	3.351	3.351	3.221		Count	16
ZAKFEZ	4.146	3.717	3.784	3.712	3.814	4.079	3.712
ZAKFID	4.131	3.7	3.772	3.704	3.795	4.088	3.7

## Sheet: tBu_net
Refcode	DIST3	DIST4	DIST5	DIST6	DIST7	DIST8	min		Min
AMOGIU	3.301	3.408	3.22	3.173	3.32	4.839	3.173
AMOGOA	3.257	4.852	3.385	4.871	3.579	3.159	3.159		Mean	3.1625
AMOJOD	3.323	3.221	3.258	3.285	3.165	3.498	3.165		Standard Error
AMOJUJ	4.854	3.231	3.382	3.568	3.225	4.929	3.225		Median	3.2085
AMOKAQ	4.923	3.405	3.33	3.455	3.202	4.863	3.202		Mode	3.297
BITPUS	4.889	3.418	3.235	3.329	3.317	3.369	3.235		Standard Deviation	3.297
BITYOV	4.213	4.706	2.868	4.949	3.432	3.4	2.868		Sample Variance	0.0222649
BITYUB	3.446	4.928	3.298	3.298	4.928	3.446	3.298		Kurtosis	0.294702
CISCEN	4.831	3.848	3.006	3.006	3.848	4.831	3.006		Skewness	-1.15163
GAQZOQ	2.936	3.945	2.832	2.919	2.959	4.331	2.832		Range	0.475
HEPSOL	4.888	3.369	3.4	3.453	3.307	4.894	3.307		Minimum	2.832
QIGBAL	4.854	3.195	3.243	3.346	3.282	3.09	3.09		Maximum	3.307
RIPWAR	3.297	4.844	3.328	3.328	4.844	3.297	3.297		Sum	63.25
SAYYOJ	3.215	3.393	4.828	4.846	3.36	3.291	3.215		Count	20
SAZCUU	4.881	3.394	3.297	4.896	3.303	3.416	3.297
WOZREK	4.892	3.268	3.385	4.905	3.356	3.36	3.268
WOZSAH	3.334	3.339	4.899	4.914	3.27	3.4	3.27
XATTOE	2.963	4.359	2.91	4.828	3.006	3.172	2.91
YUDZUV	3.306	3.451	4.903	4.903	3.451	3.306	3.306
ZUZKOX	4.836	3.58	3.127	3.32	3.254	4.815	3.127

## Sheet: combined_net
AFOCEE	3.637		Min
AFUPEZ	3.819
AFUPID	3.78		Mean	3.69764
AFUPOJ	3.811		Standard Error
AFUPUP	3.782		Median	3.7155
AFUQAW	3.714		Mode	3.78
AGUVIK	3.617		Standard Deviation	0.202836
AGUVOQ	3.674		Sample Variance	0.0411425
AGUYAF	3.84		Kurtosis	1.96401
AKONAQ	3.607		Skewness	-0.819058
AKONEU	3.818		Range	1.346
AKONIY	3.718		Minimum	2.832
AKONUK	3.854		Maximum	4.178
AMOHIV	3.722		Sum	2063.28
AMOHOB	3.818		Count	558
AMOHUH	3.582
AMOJAP	3.612
APUBUL	3.771
ATANUH	3.629
AVIDEQ	3.891
AVIDIU	3.54
AVIDOA	3.705
AVIDUG	3.939
AVIFAO	3.631
AVIFES	3.742
AVIFIW	3.694
AVIFOC	3.569
BABNUR	3.94
BAGDAS	3.712
BAJQAG	3.678
BAJQEK	3.683
BAJQIO	3.649
BAJQOU	3.739
BAJQUA	3.716
BIBPIM	3.766
BIBPOS	3.768
BIBPUY	3.791
BISZIO	3.543
BISZOU	3.735
BODKAJ	3.573
BODKEN	3.718
BODKIR	3.707
BODPES	3.908
BODPIW	3.626
BODPOC	3.828
BOLHIW	3.803
BOLHOC	3.935
BOLHUI	3.588
BOLJAQ	3.577
BUJWEL	3.653
BUJWIP	3.585
CADNOO	3.553
CEDHOJ	3.721
CEDHUP	3.578
CERKES	3.701
CEZDUH	3.709
CIDGIG	3.838
CIRZUZ	3.511
CODGUZ	3.652
CODHAG	3.738
COXSIT	3.843
CUNVEO	3.522
CUNVIS	3.543
CUNVOY	3.564
CUNVUE	3.635
CUNWAL	3.625
DEGVOB	3.836
DEGVUH	3.764
DELFIM	3.578
DIMHAL	3.798
DOFVUR	3.808
DOFWAY	3.765
DOFWEC	3.539
DOWQIS	3.843
DOWRAL	3.951
DOWREP	3.649
DOWRIT	3.912
DOZVUM	3.651
DOZWIB	3.648
DUMDOG	3.742
EDEKAB	3.802
EDEKEF	3.606
EGEJIM	3.681
EHEBOK	3.945
EHEBUQ	3.564
EJUXEP	3.67
ENEFEL	3.866
ENUWER	3.447
EVAHEO	3.813
EVICER	3.669
EVICIV	3.746
EVICOB	3.666
EWEJAT	3.671
FAFYAO	3.924
FAFYES	3.722
FAGBAS	3.654
FENDEJ	3.562
FENDIN	3.884
FIQVUZ	3.581
FOBHUC	3.643
FOBJAK	3.625
FOBJEO	3.614
FOBJIS	3.586
FORDAU	3.675
FORDEY	3.59
FORDIC	3.621
FORDOI	3.784
FORDUO	3.676
FORFAW	3.614
FORFEA	3.758
FORFIE	3.793
GADZET	3.548
GERLIB	3.862
GEVDOD	3.868
GEVDUJ	3.643
GOQSUC	3.82
GOQTAJ	3.751
GOTGIH	3.544
GUFJIC	3.736
GUFVAG	3.762
GUFVEK	3.854
GUFVIO	3.645
GUJNOR	3.731
HEPTAY	3.844
HETWUB	3.77
HEWGIC	3.302
HEWPIL	3.904
HEWPOR	3.854
HOBPAR	3.607
HOKSEI	3.769
HUTVIE	3.708
ICADEY	3.826
IJOHAT	3.943
IJOHEX	3.906
IKUKIL	3.726
IKULEI	3.596
IMOMUV	3.869
IMUXUM	3.78
IMUYAT	3.41
INUSOA	3.45
INUSUG	3.855
INUTAN	3.619
IRUQIY	3.865
ITAYUZ	3.882
ITAZAG	3.76
ITAZIO	3.79
ITOGOQ	3.76
IYAWIP	3.74
IYAWOV	3.757
IYOCIL	3.73
IYOCOR	4.154
IYOLAM	3.743
IYOLEQ	4.056
IYOLOA	4.053
IYOLUG	3.825
IYOMAN	3.738
IYOMER	4.067
IYOMIV	3.796
JANYIJ	3.794
JEZSUF	3.665
JEZTAM	4.028
JEZWOD	3.614
JOVNOZ	3.794
KAMCOT	3.935
KAQSON	3.715
KAQSUT	3.95
KAVBAN	3.466
KAYSOV	3.745
KAYSUB	3.668
KECVAS	3.73
KEHHOX	3.891
KEKKUJ	3.66
KEKLAQ	3.676
KEMVOP	3.626
KIKKAS	3.806
KIQYAM	3.648
KIQYEQ	3.597
KIQYIU	3.695
KIWNUB	3.715
KIWPAJ	3.717
KIWPEN	3.734
KIWPIR	3.794
KIWPOX	3.797
KIWPUD	3.733
KUWLUK	3.73
KUWMAR	3.575
LAJMUG	3.652
LAJNAN	3.818
LUJVUI	3.809
LUJWAP	3.615
LUJWET	3.387
LUKKUA	3.78
LUKLAH	3.703
LUVZIO	3.663
LUVZOU	3.722
LUVZUA	3.705
LUWBAJ	3.7
LUWBEN	3.857
MALYOP	3.748
MALYUV	3.866
MEQZAM	3.476
MOHXEO	3.645
MOHXOY	3.606
MUSWAA	3.972
NAMWUW	3.796
NAMXAD	3.868
NAZPAI	3.529
NETLOQ	3.806
NETLUW	3.849
NETMAD	3.882
NETMEH	3.766
NETMIL	3.761
NETMOR	3.772
NETMUX	3.603
NIHXAG	3.702
NIHYEL	4.048
NIHZOV	3.738
NIJBIT	3.688
NIWROD	3.748
NIWSAQ	3.708
NOSNEQ	3.558
NOSNIU	3.913
NOSNOA	3.482
NOSNUG	3.71
NURYUX	3.586
NURZAE	3.497
NUSCAI	3.775
OJOHIH	3.594
OROXOL	3.591
OROXUR	3.733
OSEJUS	3.989
OSEKAZ	3.776
OVAQAG	3.557
OXAWAO	3.831
OXUFAP	3.249
PEMXIP	3.665
PEMXOV	3.815
PEPKOM	3.861
PEPKUS	3.816
PIPKIL	3.683
PITCED	3.586
PITCIH	3.837
PITCUT	3.636
PITDAA	3.646
PITDEE	3.576
POFXAL	3.695
POGCEV	3.971
POGYIV	3.825
POKNEK	3.512
POKNIO	3.837
POKNOU	3.827
POKNUA	3.486
POKPAI	3.713
POKPEM	3.631
PUBRAI	3.55
PUBREM	3.578
PUQWEF	3.718
PUQWIJ	3.595
PUTZEM	3.6
QACVAV	3.994
QAXKAC	4.004
QEGTII	3.818
QENLON	4.069
QENMOO	3.716
QENMUU	3.66
QICVUU	3.824
QICWAB	3.818
QICWEF	3.855
QICWIJ	3.917
QIFXOU	3.701
QIFZIQ	3.609
QIFZOW	3.552
QIFZUC	4.007
QIGBAL	3.781
QIGBEP	3.763
QIGBIT	3.655
QIGBOZ	3.551
QIGBUF	3.786
QIGCAM	3.752
QOMDIH	3.584
QUBZIX	3.827
RADJAL	3.811
RAKDUE	3.774
RENYOB	3.887
RESGAZ	3.78
RESZEW	3.587
ROQPOE	3.82
RUMKAN	3.901
RUMKER	3.959
RUMKIV	3.767
RUMKOB	3.843
RUMKUH	3.766
SEQRAI	3.761
SEQREM	3.558
SESNOV	3.924
SESNUB	3.552
SESPAJ	3.645
SETJEJ	3.665
SETKOS	3.669
SIJJIH	3.984
SILZOE	3.772
SINQAK	3.726
SOQZUV	3.689
SORNOE	3.694
SORNUK	3.608
SORPAS	3.819
SORPEW	3.791
SORPIA	3.72
SORPOG	3.761
SORPUM	3.847
SUGPES	3.604
TAJQIH	3.732
TATTIT	3.689
TAVRUF	3.734
TAXGUX	3.78
TOQRUO	3.73
TOQSAV	3.657
TOQSEZ	3.654
TOQSOJ	3.64
TOQSUP	3.626
TOVPIG	3.661
TOVPOM	3.89
UFAVUV	3.718
UFOROX	3.65
UFORUD	3.608
UJOVEV	3.586
UJOVIZ	3.445
UJOVOF	3.909
ULEWAM	3.865
ULEWEQ	3.678
ULEWIU	4.178
ULEWUG	3.925
UWIMUK	3.624
UYUSIS	3.707
VAFLOF	3.836
VAFLUL	3.885
VAFMAS	3.87
VEVSAS	3.941
VUCKIP	3.459
VUPYOW	3.823
VUPYUC	3.986
VUQBIU	3.816
WAPKAC	3.733
WAPKEG	3.647
WAXMOA	3.874
WICCET	3.768
WISJEQ	3.818
WOCWUI	3.88
WOCYET	3.61
WOCYIX	3.834
WUDXAX	3.763
WUDXEB	3.989
WUDYAY	3.744
WUTBOF	3.58
WUTBUL	3.96
WUTCAS	3.92
WUTCEW	3.723
WUTCIA	3.626
WUWPUB	3.556
WUWQAI	3.615
WUWQEM	3.319
XATTAQ	3.731
XAXQET	3.702
XAXQIX	3.862
XAXQOD	3.88
XEJZOE	3.816
XEJZUK	4.119
XENNIO	3.863
XESVEY	3.881
XIJXUK	3.554
XIKZIC	4.027
XIQGEK	3.757
XIWFAN	3.625
XODQOZ	3.561
XODQUF	3.514
XODRAM	3.561
XODREQ	3.575
XODRIU	3.351
XODROA	3.551
XODRUG	3.577
XODSAN	3.549
XODSER	3.624
XODSIV	3.656
XODSOB	3.56
XODSUH	3.556
XODTAO	3.61
XODTES	3.62
XODTIW	3.513
XODTUI	3.498
XODVAQ	3.528
XODVEU	3.321
XODVIY	3.681
XODVOE	3.785
XODVUK	3.426
XOHFOQ	3.676
XUPVUA	3.726
YIZBUG	3.579
YOQMID	3.483
YOQSAB	3.956
YOQTUW	3.523
YOQWAF	3.785
YOQWOT	3.514
YOQWUZ	3.67
YOQXAG	3.556
YOQXEK	3.847
YOZXAP	3.577
YUCYON	3.898
YUDZEF	3.685
YUFBAF	3.67
YUFBEJ	3.75
YUFBIN	3.615
YUGHIU	3.65
AGUXIM	3.506
AGUXOS	3.449
AKOROK	3.844
AMOJET	3.83
AMOJIX	3.78
BABNOL	3.878
BAGDIA	3.797
BOLHES	3.893
BOLJEU	3.72
CADNII	3.677
CILJAJ	3.703
CILJEN	3.73
CIMBOS	3.425
CISBAI	3.641
CISBEM	3.766
CISBIQ	3.756
CISBOW	3.827
DOZWOH	3.927
EVUGUA	3.708
EWEGUK	3.527
EWEHIZ	4.135
EWOQEO	4.062
EWOQIS	3.714
FIJFIQ	3.609
FOCTUQ	3.751
FOCVAY	3.466
FUTKUB	3.895
GEFBUS	4.087
GOQSUC	4.001
GUKBIB	3.545
HEPSUR	3.529
HOBNOD	3.769
HOBNUJ	3.738
HOBPEV	3.663
HOBPEV01	3.887
JUVMOF	4.097
KAQVOQ	4.094
KEHQAQ	4.133
KIQYOA	4.117
KUFGUO	3.881
KUMJOU	3.8
KUMJUA	3.766
MAGYOK	3.864
MOXSEA	3.665
NIHZIP	3.856
NIHZUB	3.755
NIJBAL	3.737
NIXLIQ	4.134
NONVIW	3.944
NUYVIQ	4.003
NUYVOW	3.911
NUZCOE	3.84
OJOFID	4.052
ORUMIZ	3.52
ORUMOF	3.479
PAPDOA	3.621
PEMXUB	3.694
QEGDOX	3.598
QICWOP	3.701
QIFZIQ	3.94
QIFZOW	3.704
QIRNAK	3.493
QIRNIS	3.595
QOMDED	3.69
QOMDON	3.767
QOMDUT	3.83
REBLUH	3.976
RENYER	3.775
RESFEC	4.127
REVHIK	3.67
RIYQID	3.253
RIYSOL	3.425
RONWIE	3.903
RUJWEB	3.771
RUMJEQ	3.784
RUMJIU	3.699
RUMJOA	4.159
RUMJUG	3.745
RUMWON	3.598
RUMWON01	3.893
RUMWUT	3.71
RUMXAA	3.599
RUZKEG	3.986
SARFAU	3.578
SEQRIQ	3.866
SILZUK	3.908
TAQQEK	3.656
TATTEP	3.816
TOCKOO	3.599
TOCLAB	3.827
UBECOX	3.541
UTOCIQ	3.701
VAFNAT	3.528
VUGFEL	3.719
VUGFIP	3.679
VUGFOV	3.755
WOBSIT	3.777
WOBSOZ	3.709
XABPUN	4.144
XABPUN01	4.15
XATTEU	3.607
XATTIY	3.408
XIJXEU	3.401
YUDZIJ	4.138
YUDZOP	3.63
YUDZOP01	3.761
YUFBOT	3.459
YUTTAL	3.766
ZETYIK	3.747
ZETYUW	3.695
CISBUC	3.222
CISCAJ	3.015
PAPDEQ	3.263
QIFZUC	3.35
RESGIH	3.317
TUKGUC	3.18
VAFMEW	3.176
VAFMIA	3.283
VAFMOG	3.063
VAFNEX	3.239
VAFNIB	3.293
XATTUK	3.277
YUHREB	3.177
YUHRIF	3.221
ZAKFEZ	3.712
ZAKFID	3.7
AMOGIU	3.173
AMOGOA	3.159
AMOJOD	3.165
AMOJUJ	3.225
AMOKAQ	3.202
BITPUS	3.235
BITYOV	2.868
BITYUB	3.298
CISCEN	3.006
GAQZOQ	2.832
HEPSOL	3.307
QIGBAL	3.09
RIPWAR	3.297
SAYYOJ	3.215
SAZCUU	3.297
WOZREK	3.268
WOZSAH	3.27
XATTOE	2.91
YUDZUV	3.306
ZUZKOX	3.127
